# Supplementary material for: The C. elegans 3′ UTRome v2 resource for studying mRNA cleavage and polyadenylation, 3′-UTR biology, and miRNA targeting
Source: HighWire-hosted journal article supplement (doi:10.1101/gr.254839.119), 2019-11-19
Supplement: Supplemental_Table_S1.xlsx [file Supplemental_Table_S1.xlsx]

## Sheet: Datasets used in this study
Name	Submitter	Sequencing Method	Size	Title
ERR1521849	University of Fribourg Biology department Zoology institute (University of Fribourg Biology department Zoology )	Illumina HiSeq 2000	44.9M spots, 4.5G bases, 2.6Gb	RNA-Seq of Caenorhabditis elegans Mi2-depleted embryos at 24- and 100-cell stages
ERR1521850	University of Fribourg Biology department Zoology institute (University of Fribourg Biology department Zoology )	Illumina HiSeq 2000	44.7M spots, 4.5G bases, 2.7Gb	RNA-Seq of Caenorhabditis elegans Mi2-depleted embryos at 24- and 100-cell stages
ERR1521851	University of Fribourg Biology department Zoology institute (University of Fribourg Biology department Zoology )	Illumina HiSeq 2000	40.4M spots, 4.1G bases, 2.3Gb	RNA-Seq of Caenorhabditis elegans Mi2-depleted embryos at 24- and 100-cell stages
ERR1521852	University of Fribourg Biology department Zoology institute (University of Fribourg Biology department Zoology )	Illumina HiSeq 2000	40M spots, 4G bases, 2.3Gb	RNA-Seq of Caenorhabditis elegans Mi2-depleted embryos at 24- and 100-cell stages
ERR1521854	University of Fribourg Biology department Zoology institute (University of Fribourg Biology department Zoology )	Illumina HiSeq 2000	45.8M spots, 4.6G bases, 2.7Gb	RNA-Seq of Caenorhabditis elegans Mi2-depleted embryos at 24- and 100-cell stages
ERR1521855	University of Fribourg Biology department Zoology institute (University of Fribourg Biology department Zoology )	Illumina HiSeq 2000	54.3M spots, 5.5G bases, 3.2Gb	RNA-Seq of Caenorhabditis elegans Mi2-depleted embryos at 24- and 100-cell stages
ERR1521856	University of Fribourg Biology department Zoology institute (University of Fribourg Biology department Zoology )	Illumina HiSeq 2000	48.4M spots, 4.9G bases, 2.8Gb	RNA-Seq of Caenorhabditis elegans Mi2-depleted embryos at 24- and 100-cell stages
ERR1521857	University of Fribourg Biology department Zoology institute (University of Fribourg Biology department Zoology )	Illumina HiSeq 2000	51.3M spots, 5.2G bases, 3.2Gb	RNA-Seq of Caenorhabditis elegans Mi2-depleted embryos at 24- and 100-cell stages
ERR1521858	University of Fribourg Biology department Zoology institute (University of Fribourg Biology department Zoology )	Illumina HiSeq 2000	49.5M spots, 5G bases, 3Gb	RNA-Seq of Caenorhabditis elegans Mi2-depleted embryos at 24- and 100-cell stages
ERR1521859	University of Fribourg Biology department Zoology institute (University of Fribourg Biology department Zoology )	Illumina HiSeq 2000	52.4M spots, 5.3G bases, 3.1Gb	RNA-Seq of Caenorhabditis elegans Mi2-depleted embryos at 24- and 100-cell stages
ERR1521860	University of Fribourg Biology department Zoology institute (University of Fribourg Biology department Zoology )	Illumina HiSeq 2000	46.7M spots, 4.7G bases, 2.9Gb	RNA-Seq of Caenorhabditis elegans Mi2-depleted embryos at 24- and 100-cell stages
ERR1521861	University of Fribourg Biology department Zoology institute (University of Fribourg Biology department Zoology )	Illumina HiSeq 2000	44.4M spots, 4.5G bases, 2.7Gb	RNA-Seq of Caenorhabditis elegans Mi2-depleted embryos at 24- and 100-cell stages
ERR1530695	GURDON INSTITUTE	Illumina HiSeq 1500	58.9M spots, 5.9G bases, 2.5Gb	Small RNA and total RNA sequencing of C. elegans with mutations in the hrde-1 and emb-4 genes
ERR1530697	GURDON INSTITUTE	Illumina HiSeq 1500	57.8M spots, 5.8G bases, 2.4Gb	Small RNA and total RNA sequencing of C. elegans with mutations in the hrde-1 and emb-4 genes
ERR1530704	GURDON INSTITUTE	Illumina HiSeq 1500	59.8M spots, 6G bases, 2.5Gb	Small RNA and total RNA sequencing of C. elegans with mutations in the hrde-1 and emb-4 genes
ERR1530709	GURDON INSTITUTE	Illumina HiSeq 1500	70.4M spots, 7.1G bases, 2.9Gb	Small RNA and total RNA sequencing of C. elegans with mutations in the hrde-1 and emb-4 genes
ERR1530711	GURDON INSTITUTE	Illumina HiSeq 1500	64.8M spots, 6.5G bases, 2.6Gb	Small RNA and total RNA sequencing of C. elegans with mutations in the hrde-1 and emb-4 genes
ERR305390	European Molecular Biology Laboratory	Illumina Genome Analyzer IIx	26M spots, 3.9G bases, 2.6Gb	RNA-seq transcript assembly evaluation
ERR305394	European Molecular Biology Laboratory	Illumina Genome Analyzer IIx	24.1M spots, 3.6G bases, 2.4Gb	RNA-seq transcript assembly evaluation
ERR305400	European Molecular Biology Laboratory	Illumina Genome Analyzer IIx	23.2M spots, 3.5G bases, 2.3Gb	RNA-seq transcript assembly evaluation
SRR1006135	Indiana University	Illumina HiSeq 2000	n/a	Caenorhabditis elegans Transcriptome or Gene expression
SRR1006136	Indiana University	Illumina HiSeq 2000	n/a	Caenorhabditis elegans Transcriptome or Gene expression
SRR1006196	Indiana University	Illumina HiSeq 2000	111M spots, 22.4G bases, 13.2Gb	Caenorhabditis elegans Transcriptome or Gene expression
SRR1006197	Indiana University	Illumina HiSeq 2000	92.9M spots, 18.8G bases, 12.2Gb	Caenorhabditis elegans Transcriptome or Gene expression
SRR1006198	Indiana University	Illumina HiSeq 2000	21.7M spots, 4.4G bases, 2.9Gb	Caenorhabditis elegans Transcriptome or Gene expression
SRR1006413	Indiana University	Illumina HiSeq 2000	22.2M spots, 4.5G bases, 3Gb	Caenorhabditis elegans Transcriptome or Gene expression
SRR1006417	Indiana University	Illumina HiSeq 2000	72.6M spots, 14.7G bases, 9Gb	Caenorhabditis elegans Transcriptome or Gene expression
SRR1010357	Indiana University	Illumina HiSeq 2000	127.9M spots, 25.8G bases, 17.1Gb	Caenorhabditis elegans Transcriptome or Gene expression
SRR1015363	Gene Expression Omnibus (GEO)	Illumina HiSeq 2000	209.8M spots, 23.1G bases, 12.4Gb	The dsRBP and inactive editor, ADR-1, utilizes dsRNA binding to regulate A-to-I RNA editing across the C. elegans transcriptome
SRR1050769	Gene Expression Omnibus (GEO)	Illumina Genome Analyzer IIx	46.3M spots, 6.8G bases, 4.2Gb	Conservation of mRNA and protein expression during development of C. elegans
SRR1050770	Gene Expression Omnibus (GEO)	Illumina Genome Analyzer IIx	51.2M spots, 7.5G bases, 4.8Gb	Conservation of mRNA and protein expression during development of C. elegans
SRR1050772	Gene Expression Omnibus (GEO)	Illumina Genome Analyzer IIx	46.2M spots, 6.7G bases, 4.2Gb	Conservation of mRNA and protein expression during development of C. elegans
SRR1050773	Gene Expression Omnibus (GEO)	Illumina Genome Analyzer IIx	48.1M spots, 7G bases, 4.4Gb	Conservation of mRNA and protein expression during development of C. elegans
SRR1050778	Gene Expression Omnibus (GEO)	Illumina Genome Analyzer IIx	13.8M spots, 2.1G bases, 1.5Gb	Conservation of mRNA and protein expression during development of C. elegans
SRR1050780	Gene Expression Omnibus (GEO)	Illumina Genome Analyzer IIx	15.3M spots, 2.3G bases, 1.7Gb	Conservation of mRNA and protein expression during development of C. elegans
SRR1125001	The Genome Center at Washington University School of Medicine in St. Louis (WUGSC)	Illumina Genome Analyzer II	32.8M spots, 6.6G bases, 3.9Gb	Caenorhabditis elegans Transcriptome or Gene expression
SRR1146673	Gene Expression Omnibus (GEO)	Illumina HiSeq 2000	98.3M spots, 9.8G bases, 6.4Gb	mRNAs that co-purify with OMA-1 in the C. elegans germline (sequencing)
SRR1176664	Gene Expression Omnibus (GEO)	Illumina HiSeq 2000	16.3M spots, 3.3G bases, 2Gb	Transcriptome wide identification of Dicer binding in human and C. elegans reveals a variety of substrates (CEL RNA-Seq)
SRR1176665	Gene Expression Omnibus (GEO)	Illumina HiSeq 2000	10.3M spots, 2.1G bases, 1.3Gb	Transcriptome wide identification of Dicer binding in human and C. elegans reveals a variety of substrates (CEL RNA-Seq)
SRR1176666	Gene Expression Omnibus (GEO)	Illumina HiSeq 2000	17.3M spots, 3.5G bases, 2.1Gb	Transcriptome wide identification of Dicer binding in human and C. elegans reveals a variety of substrates (CEL RNA-Seq)
SRR1198063	Gene Expression Omnibus (GEO)	Illumina HiSeq 2500	44.5M spots, 4.5G bases, 3.1Gb	mRNA profile in DR-related mutants
SRR1198064	Gene Expression Omnibus (GEO)	Illumina HiSeq 2500	42.9M spots, 4.3G bases, 2.9Gb	mRNA profile in DR-related mutants
SRR1198065	Gene Expression Omnibus (GEO)	Illumina HiSeq 2500	42.7M spots, 4.3G bases, 2.9Gb	mRNA profile in DR-related mutants
SRR1198066	Gene Expression Omnibus (GEO)	Illumina HiSeq 2500	68.3M spots, 6.9G bases, 4.8Gb	mRNA profile in DR-related mutants
SRR1198067	Gene Expression Omnibus (GEO)	Illumina HiSeq 2500	45.6M spots, 4.6G bases, 3.1Gb	mRNA profile in DR-related mutants
SRR1198068	Gene Expression Omnibus (GEO)	Illumina HiSeq 2500	56.6M spots, 5.7G bases, 3.9Gb	mRNA profile in DR-related mutants
SRR1198069	Gene Expression Omnibus (GEO)	Illumina HiSeq 2500	38.1M spots, 3.8G bases, 2.6Gb	mRNA profile in DR-related mutants
SRR1198070	Gene Expression Omnibus (GEO)	Illumina HiSeq 2500	38.8M spots, 3.9G bases, 2.6Gb	mRNA profile in DR-related mutants
SRR1198071	Gene Expression Omnibus (GEO)	Illumina HiSeq 2500	31.5M spots, 3.2G bases, 2.2Gb	mRNA profile in DR-related mutants
SRR1198072	Gene Expression Omnibus (GEO)	Illumina HiSeq 2500	27.1M spots, 2.7G bases, 1.9Gb	mRNA profile in DR-related mutants
SRR1198073	Gene Expression Omnibus (GEO)	Illumina HiSeq 2500	45.6M spots, 4.6G bases, 3.1Gb	mRNA profile in DR-related mutants
SRR1198074	Gene Expression Omnibus (GEO)	Illumina HiSeq 2500	42M spots, 4.2G bases, 2.9Gb	mRNA profile in DR-related mutants
SRR1233915	Harvard University	Illumina HiSeq 2000	n/a	Caenorhabditis elegans Transcriptome or Gene expression
SRR1237952	Harvard University	Illumina HiSeq 2000	n/a	Caenorhabditis elegans Transcriptome or Gene expression
SRR1259266	Harvard University	Illumina HiSeq 2000	n/a	Caenorhabditis elegans Transcriptome or Gene expression
SRR1259307	Harvard University	Illumina HiSeq 2000	n/a	Caenorhabditis elegans Transcriptome or Gene expression
SRR1263137	Gene Expression Omnibus (GEO)	Illumina HiSeq 2000	n/a	A new dataset of spermatogenic vs oogenic transcriptomes in the nematode C. elegans
SRR1263138	Gene Expression Omnibus (GEO)	Illumina HiSeq 2000	n/a	A new dataset of spermatogenic vs oogenic transcriptomes in the nematode C. elegans
SRR1263139	Gene Expression Omnibus (GEO)	Illumina HiSeq 2000	n/a	A new dataset of spermatogenic vs oogenic transcriptomes in the nematode C. elegans
SRR1263140	Gene Expression Omnibus (GEO)	Illumina HiSeq 2000	n/a	A new dataset of spermatogenic vs oogenic transcriptomes in the nematode C. elegans
SRR1263141	Gene Expression Omnibus (GEO)	Illumina HiSeq 2000	n/a	A new dataset of spermatogenic vs oogenic transcriptomes in the nematode C. elegans
SRR1263142	Gene Expression Omnibus (GEO)	Illumina HiSeq 2000	n/a	A new dataset of spermatogenic vs oogenic transcriptomes in the nematode C. elegans
SRR1263143	Gene Expression Omnibus (GEO)	Illumina HiSeq 2000	n/a	A new dataset of spermatogenic vs oogenic transcriptomes in the nematode C. elegans
SRR1263144	Gene Expression Omnibus (GEO)	Illumina HiSeq 2000	n/a	A new dataset of spermatogenic vs oogenic transcriptomes in the nematode C. elegans
SRR1263145	Gene Expression Omnibus (GEO)	Illumina HiSeq 2000	n/a	A new dataset of spermatogenic vs oogenic transcriptomes in the nematode C. elegans
SRR1263146	Gene Expression Omnibus (GEO)	Illumina HiSeq 2000	n/a	A new dataset of spermatogenic vs oogenic transcriptomes in the nematode C. elegans
SRR1263147	Gene Expression Omnibus (GEO)	Illumina HiSeq 2000	n/a	A new dataset of spermatogenic vs oogenic transcriptomes in the nematode C. elegans
SRR1263159	Gene Expression Omnibus (GEO)	Illumina HiSeq 2000	n/a	A new dataset of spermatogenic vs oogenic transcriptomes in the nematode C. elegans
SRR1263160	Gene Expression Omnibus (GEO)	Illumina HiSeq 2000	n/a	A new dataset of spermatogenic vs oogenic transcriptomes in the nematode C. elegans
SRR1263161	Gene Expression Omnibus (GEO)	Illumina HiSeq 2000	n/a	A new dataset of spermatogenic vs oogenic transcriptomes in the nematode C. elegans
SRR1263162	Gene Expression Omnibus (GEO)	Illumina HiSeq 2000	n/a	A new dataset of spermatogenic vs oogenic transcriptomes in the nematode C. elegans
SRR1263163	Gene Expression Omnibus (GEO)	Illumina HiSeq 2000	n/a	A new dataset of spermatogenic vs oogenic transcriptomes in the nematode C. elegans
SRR1263164	Gene Expression Omnibus (GEO)	Illumina HiSeq 2000	n/a	A new dataset of spermatogenic vs oogenic transcriptomes in the nematode C. elegans
SRR1263165	Gene Expression Omnibus (GEO)	Illumina HiSeq 2000	n/a	A new dataset of spermatogenic vs oogenic transcriptomes in the nematode C. elegans
SRR1263166	Gene Expression Omnibus (GEO)	Illumina HiSeq 2000	n/a	A new dataset of spermatogenic vs oogenic transcriptomes in the nematode C. elegans
SRR1263167	Gene Expression Omnibus (GEO)	Illumina HiSeq 2000	n/a	A new dataset of spermatogenic vs oogenic transcriptomes in the nematode C. elegans
SRR1263168	Gene Expression Omnibus (GEO)	Illumina HiSeq 2000	n/a	A new dataset of spermatogenic vs oogenic transcriptomes in the nematode C. elegans
SRR1263169	Gene Expression Omnibus (GEO)	Illumina HiSeq 2000	n/a	A new dataset of spermatogenic vs oogenic transcriptomes in the nematode C. elegans
SRR1263170	Gene Expression Omnibus (GEO)	Illumina HiSeq 2000	n/a	A new dataset of spermatogenic vs oogenic transcriptomes in the nematode C. elegans
SRR1263171	Gene Expression Omnibus (GEO)	Illumina HiSeq 2000	n/a	A new dataset of spermatogenic vs oogenic transcriptomes in the nematode C. elegans
SRR1263172	Gene Expression Omnibus (GEO)	Illumina HiSeq 2000	n/a	A new dataset of spermatogenic vs oogenic transcriptomes in the nematode C. elegans
SRR1263173	Gene Expression Omnibus (GEO)	Illumina HiSeq 2000	n/a	A new dataset of spermatogenic vs oogenic transcriptomes in the nematode C. elegans
SRR1263174	Gene Expression Omnibus (GEO)	Illumina HiSeq 2000	n/a	A new dataset of spermatogenic vs oogenic transcriptomes in the nematode C. elegans
SRR1263175	Gene Expression Omnibus (GEO)	Illumina HiSeq 2000	n/a	A new dataset of spermatogenic vs oogenic transcriptomes in the nematode C. elegans
SRR1263176	Gene Expression Omnibus (GEO)	Illumina HiSeq 2000	n/a	A new dataset of spermatogenic vs oogenic transcriptomes in the nematode C. elegans
SRR1263177	Gene Expression Omnibus (GEO)	Illumina HiSeq 2000	n/a	A new dataset of spermatogenic vs oogenic transcriptomes in the nematode C. elegans
SRR1263178	Gene Expression Omnibus (GEO)	Illumina HiSeq 2000	n/a	A new dataset of spermatogenic vs oogenic transcriptomes in the nematode C. elegans
SRR1263179	Gene Expression Omnibus (GEO)	Illumina HiSeq 2000	n/a	A new dataset of spermatogenic vs oogenic transcriptomes in the nematode C. elegans
SRR1313054	Gene Expression Omnibus (GEO)	Illumina Genome Analyzer IIx	42.1M spots, 8.5G bases, 4.9Gb	Global characterization of the oocyte-to-embryo transition in C. elegans uncovers a novel mRNA turnover mechanism
SRR1313055	Gene Expression Omnibus (GEO)	Illumina Genome Analyzer IIx	42.1M spots, 8.5G bases, 4.9Gb	Global characterization of the oocyte-to-embryo transition in C. elegans uncovers a novel mRNA turnover mechanism
SRR1313056	Gene Expression Omnibus (GEO)	Illumina Genome Analyzer IIx	35.4M spots, 7.1G bases, 4.1Gb	Global characterization of the oocyte-to-embryo transition in C. elegans uncovers a novel mRNA turnover mechanism
SRR1313057	Gene Expression Omnibus (GEO)	Illumina Genome Analyzer IIx	35.4M spots, 7.1G bases, 4.1Gb	Global characterization of the oocyte-to-embryo transition in C. elegans uncovers a novel mRNA turnover mechanism
SRR1313058	Gene Expression Omnibus (GEO)	Illumina HiSeq 2000	162.4M spots, 32.8G bases, 20.3Gb	Global characterization of the oocyte-to-embryo transition in C. elegans uncovers a novel mRNA turnover mechanism
SRR1313059	Gene Expression Omnibus (GEO)	Illumina HiSeq 2000	164.3M spots, 33.2G bases, 18.9Gb	Global characterization of the oocyte-to-embryo transition in C. elegans uncovers a novel mRNA turnover mechanism
SRR1313060	Gene Expression Omnibus (GEO)	Illumina Genome Analyzer IIx	41.3M spots, 6.3G bases, 3.5Gb	Global characterization of the oocyte-to-embryo transition in C. elegans uncovers a novel mRNA turnover mechanism
SRR1313061	Gene Expression Omnibus (GEO)	Illumina Genome Analyzer IIx	41.3M spots, 6.3G bases, 3.5Gb	Global characterization of the oocyte-to-embryo transition in C. elegans uncovers a novel mRNA turnover mechanism
SRR1474664	Broad Institute (BI)	Illumina HiSeq 2000	45.6M spots, 6.9G bases, 3Gb	Genotype-Tissue Expression (GTEx) Common Fund Project
SRR1474665	Broad Institute (BI)	Illumina HiSeq 2000	45.6M spots, 6.9G bases, 3Gb	Genotype-Tissue Expression (GTEx) Common Fund Project
SRR1474666	Broad Institute (BI)	Illumina HiSeq 2000	45.6M spots, 6.9G bases, 3Gb	Genotype-Tissue Expression (GTEx) Common Fund Project
SRR1474667	Broad Institute (BI)	Illumina HiSeq 2000	45.6M spots, 6.9G bases, 3Gb	Genotype-Tissue Expression (GTEx) Common Fund Project
SRR1474668	Broad Institute (BI)	Illumina HiSeq 2000	45.6M spots, 6.9G bases, 3Gb	Genotype-Tissue Expression (GTEx) Common Fund Project
SRR1474669	Broad Institute (BI)	Illumina HiSeq 2000	45.6M spots, 6.9G bases, 3Gb	Genotype-Tissue Expression (GTEx) Common Fund Project
SRR1474670	Broad Institute (BI)	Illumina HiSeq 2000	45.6M spots, 6.9G bases, 3Gb	Genotype-Tissue Expression (GTEx) Common Fund Project
SRR1474671	Broad Institute (BI)	Illumina HiSeq 2000	45.6M spots, 6.9G bases, 3Gb	Genotype-Tissue Expression (GTEx) Common Fund Project
SRR1474672	Broad Institute (BI)	Illumina HiSeq 2000	45.6M spots, 6.9G bases, 3Gb	Genotype-Tissue Expression (GTEx) Common Fund Project
SRR1474673	Broad Institute (BI)	Illumina HiSeq 2000	45.6M spots, 6.9G bases, 3Gb	Genotype-Tissue Expression (GTEx) Common Fund Project
SRR1474674	Broad Institute (BI)	Illumina HiSeq 2000	45.6M spots, 6.9G bases, 3Gb	Genotype-Tissue Expression (GTEx) Common Fund Project
SRR1474675	Broad Institute (BI)	Illumina HiSeq 2000	45.6M spots, 6.9G bases, 3Gb	Genotype-Tissue Expression (GTEx) Common Fund Project
SRR1474676	Broad Institute (BI)	Illumina HiSeq 2000	45.6M spots, 6.9G bases, 3Gb	Genotype-Tissue Expression (GTEx) Common Fund Project
SRR1474677	Broad Institute (BI)	Illumina HiSeq 2000	45.6M spots, 6.9G bases, 3Gb	Genotype-Tissue Expression (GTEx) Common Fund Project
SRR1474678	Broad Institute (BI)	Illumina HiSeq 2000	45.6M spots, 6.9G bases, 3Gb	Genotype-Tissue Expression (GTEx) Common Fund Project
SRR1474679	Broad Institute (BI)	Illumina HiSeq 2000	45.6M spots, 6.9G bases, 3Gb	Genotype-Tissue Expression (GTEx) Common Fund Project
SRR1474680	Broad Institute (BI)	Illumina HiSeq 2000	45.6M spots, 6.9G bases, 3Gb	Genotype-Tissue Expression (GTEx) Common Fund Project
SRR1474681	Broad Institute (BI)	Illumina HiSeq 2000	45.6M spots, 6.9G bases, 3Gb	Genotype-Tissue Expression (GTEx) Common Fund Project
SRR1474682	Broad Institute (BI)	Illumina HiSeq 2000	45.6M spots, 6.9G bases, 3Gb	Genotype-Tissue Expression (GTEx) Common Fund Project
SRR1474683	Broad Institute (BI)	Illumina HiSeq 2000	45.6M spots, 6.9G bases, 3Gb	Genotype-Tissue Expression (GTEx) Common Fund Project
SRR1474684	Broad Institute (BI)	Illumina HiSeq 2000	52.7M spots, 8G bases, 3.4Gb	Genotype-Tissue Expression (GTEx) Common Fund Project
SRR1474685	Broad Institute (BI)	Illumina HiSeq 2000	52.7M spots, 8G bases, 3.4Gb	Genotype-Tissue Expression (GTEx) Common Fund Project
SRR1474686	Broad Institute (BI)	Illumina HiSeq 2000	52.7M spots, 8G bases, 3.4Gb	Genotype-Tissue Expression (GTEx) Common Fund Project
SRR1474687	Broad Institute (BI)	Illumina HiSeq 2000	52.7M spots, 8G bases, 3.4Gb	Genotype-Tissue Expression (GTEx) Common Fund Project
SRR1474688	Broad Institute (BI)	Illumina HiSeq 2000	52.7M spots, 8G bases, 3.4Gb	Genotype-Tissue Expression (GTEx) Common Fund Project
SRR1474689	Broad Institute (BI)	Illumina HiSeq 2000	52.7M spots, 8G bases, 3.4Gb	Genotype-Tissue Expression (GTEx) Common Fund Project
SRR1474690	Broad Institute (BI)	Illumina HiSeq 2000	52.7M spots, 8G bases, 3.4Gb	Genotype-Tissue Expression (GTEx) Common Fund Project
SRR1474691	Broad Institute (BI)	Illumina HiSeq 2000	52.7M spots, 8G bases, 3.4Gb	Genotype-Tissue Expression (GTEx) Common Fund Project
SRR1474692	Broad Institute (BI)	Illumina HiSeq 2000	52.7M spots, 8G bases, 3.4Gb	Genotype-Tissue Expression (GTEx) Common Fund Project
SRR1474693	Broad Institute (BI)	Illumina HiSeq 2000	52.7M spots, 8G bases, 3.4Gb	Genotype-Tissue Expression (GTEx) Common Fund Project
SRR1474694	Broad Institute (BI)	Illumina HiSeq 2000	52.7M spots, 8G bases, 3.4Gb	Genotype-Tissue Expression (GTEx) Common Fund Project
SRR1474695	Broad Institute (BI)	Illumina HiSeq 2000	52.7M spots, 8G bases, 3.4Gb	Genotype-Tissue Expression (GTEx) Common Fund Project
SRR1474696	Broad Institute (BI)	Illumina HiSeq 2000	52.7M spots, 8G bases, 3.4Gb	Genotype-Tissue Expression (GTEx) Common Fund Project
SRR1474697	Broad Institute (BI)	Illumina HiSeq 2000	52.7M spots, 8G bases, 3.4Gb	Genotype-Tissue Expression (GTEx) Common Fund Project
SRR1474698	Broad Institute (BI)	Illumina HiSeq 2000	52.7M spots, 8G bases, 3.4Gb	Genotype-Tissue Expression (GTEx) Common Fund Project
SRR1474699	Broad Institute (BI)	Illumina HiSeq 2000	52.7M spots, 8G bases, 3.4Gb	Genotype-Tissue Expression (GTEx) Common Fund Project
SRR1474700	Broad Institute (BI)	Illumina HiSeq 2000	52.7M spots, 8G bases, 3.4Gb	Genotype-Tissue Expression (GTEx) Common Fund Project
SRR1474701	Broad Institute (BI)	Illumina HiSeq 2000	52.7M spots, 8G bases, 3.4Gb	Genotype-Tissue Expression (GTEx) Common Fund Project
SRR1474702	Broad Institute (BI)	Illumina HiSeq 2000	52.7M spots, 8G bases, 3.4Gb	Genotype-Tissue Expression (GTEx) Common Fund Project
SRR1474703	Broad Institute (BI)	Illumina HiSeq 2000	52.7M spots, 8G bases, 3.4Gb	Genotype-Tissue Expression (GTEx) Common Fund Project
SRR1474704	Broad Institute (BI)	Illumina HiSeq 2000	52.7M spots, 8G bases, 3.4Gb	Genotype-Tissue Expression (GTEx) Common Fund Project
SRR1474705	Broad Institute (BI)	Illumina HiSeq 2000	52.7M spots, 8G bases, 3.4Gb	Genotype-Tissue Expression (GTEx) Common Fund Project
SRR1501343	Gene Expression Omnibus (GEO)	Illumina HiSeq 2000	17.1M spots, 1.7G bases, 980.5Mb	Neuronal CRTC-1 governs systemic mitochondrial metabolism and lifespan via a catecholamine signal
SRR1501344	Gene Expression Omnibus (GEO)	Illumina HiSeq 2000	20.6M spots, 2.1G bases, 1.1Gb	Neuronal CRTC-1 governs systemic mitochondrial metabolism and lifespan via a catecholamine signal
SRR1501345	Gene Expression Omnibus (GEO)	Illumina HiSeq 2000	21.2M spots, 2.1G bases, 1.2Gb	Neuronal CRTC-1 governs systemic mitochondrial metabolism and lifespan via a catecholamine signal
SRR1501346	Gene Expression Omnibus (GEO)	Illumina HiSeq 2000	21.7M spots, 2.2G bases, 1.2Gb	Neuronal CRTC-1 governs systemic mitochondrial metabolism and lifespan via a catecholamine signal
SRR1501347	Gene Expression Omnibus (GEO)	Illumina HiSeq 2000	27.1M spots, 2.7G bases, 1.7Gb	Neuronal CRTC-1 governs systemic mitochondrial metabolism and lifespan via a catecholamine signal
SRR1501348	Gene Expression Omnibus (GEO)	Illumina HiSeq 2000	26.7M spots, 2.7G bases, 1.7Gb	Neuronal CRTC-1 governs systemic mitochondrial metabolism and lifespan via a catecholamine signal
SRR1501349	Gene Expression Omnibus (GEO)	Illumina HiSeq 2000	27.3M spots, 2.7G bases, 1.7Gb	Neuronal CRTC-1 governs systemic mitochondrial metabolism and lifespan via a catecholamine signal
SRR1501350	Gene Expression Omnibus (GEO)	Illumina HiSeq 2000	19.9M spots, 2G bases, 1.2Gb	Neuronal CRTC-1 governs systemic mitochondrial metabolism and lifespan via a catecholamine signal
SRR1501351	Gene Expression Omnibus (GEO)	Illumina HiSeq 2000	27.2M spots, 2.7G bases, 1.6Gb	Neuronal CRTC-1 governs systemic mitochondrial metabolism and lifespan via a catecholamine signal
SRR1501352	Gene Expression Omnibus (GEO)	Illumina HiSeq 2000	20.7M spots, 2.1G bases, 1.2Gb	Neuronal CRTC-1 governs systemic mitochondrial metabolism and lifespan via a catecholamine signal
SRR1501353	Gene Expression Omnibus (GEO)	Illumina HiSeq 2000	17.9M spots, 1.8G bases, 1Gb	Neuronal CRTC-1 governs systemic mitochondrial metabolism and lifespan via a catecholamine signal
SRR1501354	Gene Expression Omnibus (GEO)	Illumina HiSeq 2000	23.3M spots, 2.3G bases, 1.3Gb	Neuronal CRTC-1 governs systemic mitochondrial metabolism and lifespan via a catecholamine signal
SRR1513656	Gene Expression Omnibus (GEO)	Illumina HiSeq 2000	3.9M spots, 390.1M bases, 206.2Mb	A Ribonuclease Coordinates siRNA Amplification and mRNA Cleavage during RNAi
SRR1513657	Gene Expression Omnibus (GEO)	Illumina HiSeq 2000	2.2M spots, 223.5M bases, 120.6Mb	A Ribonuclease Coordinates siRNA Amplification and mRNA Cleavage during RNAi
SRR1513658	Gene Expression Omnibus (GEO)	Illumina HiSeq 2000	2.8M spots, 279.1M bases, 145.7Mb	A Ribonuclease Coordinates siRNA Amplification and mRNA Cleavage during RNAi
SRR1513659	Gene Expression Omnibus (GEO)	Illumina HiSeq 2000	3.5M spots, 347.3M bases, 181.9Mb	A Ribonuclease Coordinates siRNA Amplification and mRNA Cleavage during RNAi
SRR1513660	Gene Expression Omnibus (GEO)	Illumina HiSeq 2000	2.7M spots, 273.7M bases, 146.3Mb	A Ribonuclease Coordinates siRNA Amplification and mRNA Cleavage during RNAi
SRR1513661	Gene Expression Omnibus (GEO)	Illumina HiSeq 2000	3.4M spots, 342.5M bases, 181.6Mb	A Ribonuclease Coordinates siRNA Amplification and mRNA Cleavage during RNAi
SRR1513662	Gene Expression Omnibus (GEO)	Illumina HiSeq 2000	3.5M spots, 353.6M bases, 184.9Mb	A Ribonuclease Coordinates siRNA Amplification and mRNA Cleavage during RNAi
SRR1513663	Gene Expression Omnibus (GEO)	Illumina HiSeq 2000	3.6M spots, 363.7M bases, 192.2Mb	A Ribonuclease Coordinates siRNA Amplification and mRNA Cleavage during RNAi
SRR1513664	Gene Expression Omnibus (GEO)	Illumina HiSeq 2000	2.1M spots, 206.1M bases, 110.3Mb	A Ribonuclease Coordinates siRNA Amplification and mRNA Cleavage during RNAi
SRR1513665	Gene Expression Omnibus (GEO)	Illumina HiSeq 2000	2.6M spots, 255.8M bases, 138Mb	A Ribonuclease Coordinates siRNA Amplification and mRNA Cleavage during RNAi
SRR1513666	Gene Expression Omnibus (GEO)	Illumina HiSeq 2000	4M spots, 399.3M bases, 213.4Mb	A Ribonuclease Coordinates siRNA Amplification and mRNA Cleavage during RNAi
SRR1513667	Gene Expression Omnibus (GEO)	Illumina HiSeq 2000	2.5M spots, 250.7M bases, 132.2Mb	A Ribonuclease Coordinates siRNA Amplification and mRNA Cleavage during RNAi
SRR1513668	Gene Expression Omnibus (GEO)	Illumina HiSeq 2000	2.6M spots, 261.4M bases, 139.1Mb	A Ribonuclease Coordinates siRNA Amplification and mRNA Cleavage during RNAi
SRR1513669	Gene Expression Omnibus (GEO)	Illumina HiSeq 2000	1.8M spots, 177.4M bases, 95.8Mb	A Ribonuclease Coordinates siRNA Amplification and mRNA Cleavage during RNAi
SRR1521839	Gene Expression Omnibus (GEO)	Illumina HiSeq 1500	15.9M spots, 794.7M bases, 796.5Mb	Chromatin state dynamics during blood formation (ChIP-Seq)
SRR1521840	Gene Expression Omnibus (GEO)	Illumina HiSeq 1500	n/a	Chromatin state dynamics during blood formation (ChIP-Seq)
SRR1521841	Gene Expression Omnibus (GEO)	Illumina HiSeq 1500	n/a	Chromatin state dynamics during blood formation (ChIP-Seq)
SRR1521842	Gene Expression Omnibus (GEO)	Illumina HiSeq 1500	n/a	Chromatin state dynamics during blood formation (ChIP-Seq)
SRR1521843	Gene Expression Omnibus (GEO)	Illumina HiSeq 1500	n/a	Chromatin state dynamics during blood formation (ChIP-Seq)
SRR1521844	Gene Expression Omnibus (GEO)	Illumina HiSeq 1500	n/a	Chromatin state dynamics during blood formation (ChIP-Seq)
SRR1521845	Gene Expression Omnibus (GEO)	Illumina HiSeq 1500	n/a	Chromatin state dynamics during blood formation (ChIP-Seq)
SRR1521846	Gene Expression Omnibus (GEO)	Illumina HiSeq 1500	n/a	Chromatin state dynamics during blood formation (ChIP-Seq)
SRR1521847	Gene Expression Omnibus (GEO)	Illumina HiSeq 1500	n/a	Chromatin state dynamics during blood formation (ChIP-Seq)
SRR1521848	Gene Expression Omnibus (GEO)	Illumina HiSeq 1500	n/a	Chromatin state dynamics during blood formation (ChIP-Seq)
SRR1523361	Gene Expression Omnibus (GEO)	Illumina Genome Analyzer IIx	38.1M spots, 5.8G bases, 3.6Gb	The role of SPK-1 in alternative splicing regulation in C. elegans
SRR1523362	Gene Expression Omnibus (GEO)	Illumina Genome Analyzer IIx	23.3M spots, 3.5G bases, 2.2Gb	The role of SPK-1 in alternative splicing regulation in C. elegans
SRR1523363	Gene Expression Omnibus (GEO)	Illumina Genome Analyzer IIx	19.9M spots, 3G bases, 1.7Gb	The role of SPK-1 in alternative splicing regulation in C. elegans
SRR1523364	Gene Expression Omnibus (GEO)	Illumina Genome Analyzer IIx	15.9M spots, 2.4G bases, 1.3Gb	The role of SPK-1 in alternative splicing regulation in C. elegans
SRR1523365	Gene Expression Omnibus (GEO)	Illumina HiSeq 2000	228.6M spots, 45.7G bases, 30.9Gb	The role of SPK-1 in alternative splicing regulation in C. elegans
SRR1523366	Gene Expression Omnibus (GEO)	Illumina HiSeq 2000	228.1M spots, 45.6G bases, 31.3Gb	The role of SPK-1 in alternative splicing regulation in C. elegans
SRR1523367	Gene Expression Omnibus (GEO)	Illumina HiSeq 2000	185M spots, 37G bases, 24Gb	The role of SPK-1 in alternative splicing regulation in C. elegans
SRR1523368	Gene Expression Omnibus (GEO)	Illumina HiSeq 2000	207.2M spots, 41.4G bases, 28.2Gb	The role of SPK-1 in alternative splicing regulation in C. elegans
SRR1523642	Gene Expression Omnibus (GEO)	Illumina HiSeq 2000	78M spots, 7.8G bases, 4.7Gb	Condensin-Driven Remodeling of X-Chromosome Topology during Dosage Compensation [RNA-Seq]
SRR1523643	Gene Expression Omnibus (GEO)	Illumina HiSeq 2000	62.5M spots, 6.3G bases, 3.8Gb	Condensin-Driven Remodeling of X-Chromosome Topology during Dosage Compensation [RNA-Seq]
SRR1523644	Gene Expression Omnibus (GEO)	Illumina HiSeq 2000	42.6M spots, 4.3G bases, 2.5Gb	Condensin-Driven Remodeling of X-Chromosome Topology during Dosage Compensation [RNA-Seq]
SRR1523645	Gene Expression Omnibus (GEO)	Illumina HiSeq 2000	37M spots, 3.7G bases, 2.2Gb	Condensin-Driven Remodeling of X-Chromosome Topology during Dosage Compensation [RNA-Seq]
SRR1523646	Gene Expression Omnibus (GEO)	Illumina HiSeq 2000	31.1M spots, 3.1G bases, 2.1Gb	Condensin-Driven Remodeling of X-Chromosome Topology during Dosage Compensation [RNA-Seq]
SRR1523647	Gene Expression Omnibus (GEO)	Illumina HiSeq 2000	59.2M spots, 5.9G bases, 3.8Gb	Condensin-Driven Remodeling of X-Chromosome Topology during Dosage Compensation [RNA-Seq]
SRR1523648	Gene Expression Omnibus (GEO)	Illumina HiSeq 2000	80.7M spots, 8.1G bases, 5.2Gb	Condensin-Driven Remodeling of X-Chromosome Topology during Dosage Compensation [RNA-Seq]
SRR1525432	Arizona State University	Illumina HiSeq 2000	14.8M spots, 3G bases, 1.3Gb	Caenorhabditis elegans PAT-Seq of Intestine, pharynx and body muscle transcriptomes
SRR1525433	Arizona State University	Illumina HiSeq 2000	14.8M spots, 3G bases, 1.2Gb	Caenorhabditis elegans PAT-Seq of Intestine, pharynx and body muscle transcriptomes
SRR1536002	Gene Expression Omnibus (GEO)	Illumina HiSeq 2000	25.7M spots, 5.2G bases, 3.4Gb	Contrasting invertebrate immune defense behaviors caused by a single gene, the Caenorhabditis elegans neuropeptide receptor gene npr-1
SRR1536003	Gene Expression Omnibus (GEO)	Illumina HiSeq 2000	26.3M spots, 5.3G bases, 3.5Gb	Contrasting invertebrate immune defense behaviors caused by a single gene, the Caenorhabditis elegans neuropeptide receptor gene npr-1
SRR1536004	Gene Expression Omnibus (GEO)	Illumina HiSeq 2000	28.1M spots, 5.7G bases, 3.6Gb	Contrasting invertebrate immune defense behaviors caused by a single gene, the Caenorhabditis elegans neuropeptide receptor gene npr-1
SRR1536005	Gene Expression Omnibus (GEO)	Illumina HiSeq 2000	33.1M spots, 6.7G bases, 4.3Gb	Contrasting invertebrate immune defense behaviors caused by a single gene, the Caenorhabditis elegans neuropeptide receptor gene npr-1
SRR1536006	Gene Expression Omnibus (GEO)	Illumina HiSeq 2000	25.4M spots, 5.1G bases, 3.4Gb	Contrasting invertebrate immune defense behaviors caused by a single gene, the Caenorhabditis elegans neuropeptide receptor gene npr-1
SRR1536007	Gene Expression Omnibus (GEO)	Illumina HiSeq 2000	26.3M spots, 5.3G bases, 3.5Gb	Contrasting invertebrate immune defense behaviors caused by a single gene, the Caenorhabditis elegans neuropeptide receptor gene npr-1
SRR1536008	Gene Expression Omnibus (GEO)	Illumina HiSeq 2000	29.4M spots, 5.9G bases, 3.8Gb	Contrasting invertebrate immune defense behaviors caused by a single gene, the Caenorhabditis elegans neuropeptide receptor gene npr-1
SRR1536009	Gene Expression Omnibus (GEO)	Illumina HiSeq 2000	38.6M spots, 7.8G bases, 5.1Gb	Contrasting invertebrate immune defense behaviors caused by a single gene, the Caenorhabditis elegans neuropeptide receptor gene npr-1
SRR1536010	Gene Expression Omnibus (GEO)	Illumina HiSeq 2000	29.6M spots, 6G bases, 3.8Gb	Contrasting invertebrate immune defense behaviors caused by a single gene, the Caenorhabditis elegans neuropeptide receptor gene npr-1
SRR1536011	Gene Expression Omnibus (GEO)	Illumina HiSeq 2000	30.3M spots, 6.1G bases, 4Gb	Contrasting invertebrate immune defense behaviors caused by a single gene, the Caenorhabditis elegans neuropeptide receptor gene npr-1
SRR1536012	Gene Expression Omnibus (GEO)	Illumina HiSeq 2000	24.8M spots, 5G bases, 3.3Gb	Contrasting invertebrate immune defense behaviors caused by a single gene, the Caenorhabditis elegans neuropeptide receptor gene npr-1
SRR1536013	Gene Expression Omnibus (GEO)	Illumina HiSeq 2000	37.1M spots, 7.5G bases, 4.8Gb	Contrasting invertebrate immune defense behaviors caused by a single gene, the Caenorhabditis elegans neuropeptide receptor gene npr-1
SRR1536014	Gene Expression Omnibus (GEO)	Illumina HiSeq 2000	36.2M spots, 7.3G bases, 4.8Gb	Contrasting invertebrate immune defense behaviors caused by a single gene, the Caenorhabditis elegans neuropeptide receptor gene npr-1
SRR1536015	Gene Expression Omnibus (GEO)	Illumina HiSeq 2000	34.4M spots, 6.9G bases, 4.4Gb	Contrasting invertebrate immune defense behaviors caused by a single gene, the Caenorhabditis elegans neuropeptide receptor gene npr-1
SRR1536016	Gene Expression Omnibus (GEO)	Illumina HiSeq 2000	31.8M spots, 6.4G bases, 4.2Gb	Contrasting invertebrate immune defense behaviors caused by a single gene, the Caenorhabditis elegans neuropeptide receptor gene npr-1
SRR1536017	Gene Expression Omnibus (GEO)	Illumina HiSeq 2000	24.8M spots, 5G bases, 3.3Gb	Contrasting invertebrate immune defense behaviors caused by a single gene, the Caenorhabditis elegans neuropeptide receptor gene npr-1
SRR1536018	Gene Expression Omnibus (GEO)	Illumina HiSeq 2000	28.8M spots, 5.8G bases, 3.7Gb	Contrasting invertebrate immune defense behaviors caused by a single gene, the Caenorhabditis elegans neuropeptide receptor gene npr-1
SRR1536019	Gene Expression Omnibus (GEO)	Illumina HiSeq 2000	27.5M spots, 5.6G bases, 3.6Gb	Contrasting invertebrate immune defense behaviors caused by a single gene, the Caenorhabditis elegans neuropeptide receptor gene npr-1
SRR1536020	Gene Expression Omnibus (GEO)	Illumina HiSeq 2000	25.6M spots, 5.2G bases, 3.3Gb	Contrasting invertebrate immune defense behaviors caused by a single gene, the Caenorhabditis elegans neuropeptide receptor gene npr-1
SRR1536021	Gene Expression Omnibus (GEO)	Illumina HiSeq 2000	24.3M spots, 4.9G bases, 3.2Gb	Contrasting invertebrate immune defense behaviors caused by a single gene, the Caenorhabditis elegans neuropeptide receptor gene npr-1
SRR1536022	Gene Expression Omnibus (GEO)	Illumina HiSeq 2000	21.1M spots, 4.3G bases, 2.8Gb	Contrasting invertebrate immune defense behaviors caused by a single gene, the Caenorhabditis elegans neuropeptide receptor gene npr-1
SRR1536023	Gene Expression Omnibus (GEO)	Illumina HiSeq 2000	26.1M spots, 5.3G bases, 3.4Gb	Contrasting invertebrate immune defense behaviors caused by a single gene, the Caenorhabditis elegans neuropeptide receptor gene npr-1
SRR1536024	Gene Expression Omnibus (GEO)	Illumina HiSeq 2000	35.2M spots, 7.1G bases, 4.6Gb	Contrasting invertebrate immune defense behaviors caused by a single gene, the Caenorhabditis elegans neuropeptide receptor gene npr-1
SRR1536025	Gene Expression Omnibus (GEO)	Illumina HiSeq 2000	65M spots, 13.1G bases, 8.4Gb	Contrasting invertebrate immune defense behaviors caused by a single gene, the Caenorhabditis elegans neuropeptide receptor gene npr-1
SRR1536026	Gene Expression Omnibus (GEO)	Illumina HiSeq 2000	28.6M spots, 5.8G bases, 3.8Gb	Contrasting invertebrate immune defense behaviors caused by a single gene, the Caenorhabditis elegans neuropeptide receptor gene npr-1
SRR1536027	Gene Expression Omnibus (GEO)	Illumina HiSeq 2000	24.3M spots, 4.9G bases, 3.2Gb	Contrasting invertebrate immune defense behaviors caused by a single gene, the Caenorhabditis elegans neuropeptide receptor gene npr-1
SRR1536028	Gene Expression Omnibus (GEO)	Illumina HiSeq 2000	63.4M spots, 12.8G bases, 8.2Gb	Contrasting invertebrate immune defense behaviors caused by a single gene, the Caenorhabditis elegans neuropeptide receptor gene npr-1
SRR1536029	Gene Expression Omnibus (GEO)	Illumina HiSeq 2000	28.7M spots, 5.8G bases, 3.8Gb	Contrasting invertebrate immune defense behaviors caused by a single gene, the Caenorhabditis elegans neuropeptide receptor gene npr-1
SRR1536030	Gene Expression Omnibus (GEO)	Illumina HiSeq 2000	29.6M spots, 6G bases, 3.9Gb	Contrasting invertebrate immune defense behaviors caused by a single gene, the Caenorhabditis elegans neuropeptide receptor gene npr-1
SRR1536031	Gene Expression Omnibus (GEO)	Illumina HiSeq 2000	27M spots, 5.4G bases, 3.6Gb	Contrasting invertebrate immune defense behaviors caused by a single gene, the Caenorhabditis elegans neuropeptide receptor gene npr-1
SRR1536032	Gene Expression Omnibus (GEO)	Illumina HiSeq 2000	24.2M spots, 4.9G bases, 3.2Gb	Contrasting invertebrate immune defense behaviors caused by a single gene, the Caenorhabditis elegans neuropeptide receptor gene npr-1
SRR1536033	Gene Expression Omnibus (GEO)	Illumina HiSeq 2000	25.2M spots, 5.1G bases, 3.3Gb	Contrasting invertebrate immune defense behaviors caused by a single gene, the Caenorhabditis elegans neuropeptide receptor gene npr-1
SRR1536034	Gene Expression Omnibus (GEO)	Illumina HiSeq 2000	36.1M spots, 7.3G bases, 4.8Gb	Contrasting invertebrate immune defense behaviors caused by a single gene, the Caenorhabditis elegans neuropeptide receptor gene npr-1
SRR1536035	Gene Expression Omnibus (GEO)	Illumina HiSeq 2000	32.6M spots, 6.6G bases, 4.3Gb	Contrasting invertebrate immune defense behaviors caused by a single gene, the Caenorhabditis elegans neuropeptide receptor gene npr-1
SRR1536036	Gene Expression Omnibus (GEO)	Illumina HiSeq 2000	29.1M spots, 5.9G bases, 3.9Gb	Contrasting invertebrate immune defense behaviors caused by a single gene, the Caenorhabditis elegans neuropeptide receptor gene npr-1
SRR1536037	Gene Expression Omnibus (GEO)	Illumina HiSeq 2000	27.2M spots, 5.5G bases, 3.6Gb	Contrasting invertebrate immune defense behaviors caused by a single gene, the Caenorhabditis elegans neuropeptide receptor gene npr-1
SRR1536038	Gene Expression Omnibus (GEO)	Illumina HiSeq 2000	26.6M spots, 5.4G bases, 3.5Gb	Contrasting invertebrate immune defense behaviors caused by a single gene, the Caenorhabditis elegans neuropeptide receptor gene npr-1
SRR1536039	Gene Expression Omnibus (GEO)	Illumina HiSeq 2000	25.5M spots, 5.2G bases, 3.4Gb	Contrasting invertebrate immune defense behaviors caused by a single gene, the Caenorhabditis elegans neuropeptide receptor gene npr-1
SRR1536040	Gene Expression Omnibus (GEO)	Illumina HiSeq 2000	34M spots, 6.9G bases, 4.5Gb	Contrasting invertebrate immune defense behaviors caused by a single gene, the Caenorhabditis elegans neuropeptide receptor gene npr-1
SRR1536041	Gene Expression Omnibus (GEO)	Illumina HiSeq 2000	35.4M spots, 7.1G bases, 4.6Gb	Contrasting invertebrate immune defense behaviors caused by a single gene, the Caenorhabditis elegans neuropeptide receptor gene npr-1
SRR1536042	Gene Expression Omnibus (GEO)	Illumina HiSeq 2000	25.3M spots, 5.1G bases, 3.4Gb	Contrasting invertebrate immune defense behaviors caused by a single gene, the Caenorhabditis elegans neuropeptide receptor gene npr-1
SRR1536043	Gene Expression Omnibus (GEO)	Illumina HiSeq 2000	28.3M spots, 5.7G bases, 3.7Gb	Contrasting invertebrate immune defense behaviors caused by a single gene, the Caenorhabditis elegans neuropeptide receptor gene npr-1
SRR1536044	Gene Expression Omnibus (GEO)	Illumina HiSeq 2000	25.3M spots, 5.1G bases, 3.3Gb	Contrasting invertebrate immune defense behaviors caused by a single gene, the Caenorhabditis elegans neuropeptide receptor gene npr-1
SRR1536045	Gene Expression Omnibus (GEO)	Illumina HiSeq 2000	27M spots, 5.5G bases, 3.6Gb	Contrasting invertebrate immune defense behaviors caused by a single gene, the Caenorhabditis elegans neuropeptide receptor gene npr-1
SRR1536046	Gene Expression Omnibus (GEO)	Illumina HiSeq 2000	27.2M spots, 5.5G bases, 3.6Gb	Contrasting invertebrate immune defense behaviors caused by a single gene, the Caenorhabditis elegans neuropeptide receptor gene npr-1
SRR1536047	Gene Expression Omnibus (GEO)	Illumina HiSeq 2000	28.5M spots, 5.8G bases, 3.8Gb	Contrasting invertebrate immune defense behaviors caused by a single gene, the Caenorhabditis elegans neuropeptide receptor gene npr-1
SRR1536048	Gene Expression Omnibus (GEO)	Illumina HiSeq 2000	31.7M spots, 6.4G bases, 4.1Gb	Contrasting invertebrate immune defense behaviors caused by a single gene, the Caenorhabditis elegans neuropeptide receptor gene npr-1
SRR1536049	Gene Expression Omnibus (GEO)	Illumina HiSeq 2000	21.8M spots, 4.4G bases, 2.9Gb	Contrasting invertebrate immune defense behaviors caused by a single gene, the Caenorhabditis elegans neuropeptide receptor gene npr-1
SRR1536050	Gene Expression Omnibus (GEO)	Illumina HiSeq 2000	35.9M spots, 7.3G bases, 4.8Gb	Contrasting invertebrate immune defense behaviors caused by a single gene, the Caenorhabditis elegans neuropeptide receptor gene npr-1
SRR1536051	Gene Expression Omnibus (GEO)	Illumina HiSeq 2000	37.5M spots, 7.6G bases, 4.9Gb	Contrasting invertebrate immune defense behaviors caused by a single gene, the Caenorhabditis elegans neuropeptide receptor gene npr-1
SRR1536052	Gene Expression Omnibus (GEO)	Illumina HiSeq 2000	31.8M spots, 6.4G bases, 4.2Gb	Contrasting invertebrate immune defense behaviors caused by a single gene, the Caenorhabditis elegans neuropeptide receptor gene npr-1
SRR1536053	Gene Expression Omnibus (GEO)	Illumina HiSeq 2000	52.1M spots, 10.5G bases, 6.7Gb	Contrasting invertebrate immune defense behaviors caused by a single gene, the Caenorhabditis elegans neuropeptide receptor gene npr-1
SRR1536054	Gene Expression Omnibus (GEO)	Illumina HiSeq 2000	28.8M spots, 5.8G bases, 3.8Gb	Contrasting invertebrate immune defense behaviors caused by a single gene, the Caenorhabditis elegans neuropeptide receptor gene npr-1
SRR1536055	Gene Expression Omnibus (GEO)	Illumina HiSeq 2000	27.6M spots, 5.6G bases, 3.7Gb	Contrasting invertebrate immune defense behaviors caused by a single gene, the Caenorhabditis elegans neuropeptide receptor gene npr-1
SRR1536056	Gene Expression Omnibus (GEO)	Illumina HiSeq 2000	54.1M spots, 10.9G bases, 7Gb	Contrasting invertebrate immune defense behaviors caused by a single gene, the Caenorhabditis elegans neuropeptide receptor gene npr-1
SRR1536057	Gene Expression Omnibus (GEO)	Illumina HiSeq 2000	31.6M spots, 6.4G bases, 4.2Gb	Contrasting invertebrate immune defense behaviors caused by a single gene, the Caenorhabditis elegans neuropeptide receptor gene npr-1
SRR1560104	Gene Expression Omnibus (GEO)	Illumina HiSeq 2000	43.8M spots, 7.6G bases, 3.4Gb	Genome wide RNA Sequencing of whole C. elegans RNA
SRR1560106	Gene Expression Omnibus (GEO)	Illumina HiSeq 2000	37.9M spots, 6.5G bases, 2.9Gb	Genome wide RNA Sequencing of whole C. elegans RNA
SRR1578745	Gene Expression Omnibus (GEO)	Illumina HiSeq 2000	51.1M spots, 10.2G bases, 6.3Gb	Differential gene expression in ahr-1 mutants compared to wild-type C. elegans
SRR1578746	Gene Expression Omnibus (GEO)	Illumina HiSeq 2000	61.2M spots, 12.2G bases, 7.5Gb	Differential gene expression in ahr-1 mutants compared to wild-type C. elegans
SRR1578747	Gene Expression Omnibus (GEO)	Illumina HiSeq 2000	54M spots, 10.8G bases, 6.6Gb	Differential gene expression in ahr-1 mutants compared to wild-type C. elegans
SRR1582059	Gene Expression Omnibus (GEO)	Illumina HiSeq 2000	143.8M spots, 21.9G bases, 12.4Gb	TDP-1, the C. elegans ortholog of TDP-43, limits the accumulation of double stranded RNA
SRR1582060	Gene Expression Omnibus (GEO)	Illumina HiSeq 2000	98.9M spots, 10G bases, 3.9Gb	TDP-1, the C. elegans ortholog of TDP-43, limits the accumulation of double stranded RNA
SRR1582061	Gene Expression Omnibus (GEO)	Illumina HiSeq 2000	81.7M spots, 8.3G bases, 3.2Gb	TDP-1, the C. elegans ortholog of TDP-43, limits the accumulation of double stranded RNA
SRR1582062	Gene Expression Omnibus (GEO)	Illumina HiSeq 2000	144.7M spots, 22G bases, 12.5Gb	TDP-1, the C. elegans ortholog of TDP-43, limits the accumulation of double stranded RNA
SRR1582063	Gene Expression Omnibus (GEO)	Illumina HiSeq 2000	85.3M spots, 8.6G bases, 3.4Gb	TDP-1, the C. elegans ortholog of TDP-43, limits the accumulation of double stranded RNA
SRR1582064	Gene Expression Omnibus (GEO)	Illumina HiSeq 2000	83.1M spots, 8.4G bases, 3.3Gb	TDP-1, the C. elegans ortholog of TDP-43, limits the accumulation of double stranded RNA
SRR1582065	Gene Expression Omnibus (GEO)	Illumina HiSeq 2000	70M spots, 7.1G bases, 2.8Gb	TDP-1, the C. elegans ortholog of TDP-43, limits the accumulation of double stranded RNA
SRR1582066	Gene Expression Omnibus (GEO)	Illumina HiSeq 2000	40.8M spots, 4.1G bases, 1.8Gb	TDP-1, the C. elegans ortholog of TDP-43, limits the accumulation of double stranded RNA
SRR1582067	Gene Expression Omnibus (GEO)	Illumina HiSeq 2000	41.4M spots, 4.2G bases, 1.8Gb	TDP-1, the C. elegans ortholog of TDP-43, limits the accumulation of double stranded RNA
SRR1582068	Gene Expression Omnibus (GEO)	Illumina HiSeq 2000	33.5M spots, 3.4G bases, 1.5Gb	TDP-1, the C. elegans ortholog of TDP-43, limits the accumulation of double stranded RNA
SRR1582069	Gene Expression Omnibus (GEO)	Illumina HiSeq 2000	108.4M spots, 11G bases, 4.4Gb	TDP-1, the C. elegans ortholog of TDP-43, limits the accumulation of double stranded RNA
SRR1582070	Gene Expression Omnibus (GEO)	Illumina HiSeq 2000	54.5M spots, 5.5G bases, 2.3Gb	TDP-1, the C. elegans ortholog of TDP-43, limits the accumulation of double stranded RNA
SRR1582071	Gene Expression Omnibus (GEO)	Illumina HiSeq 2000	41.3M spots, 4.2G bases, 1.8Gb	TDP-1, the C. elegans ortholog of TDP-43, limits the accumulation of double stranded RNA
SRR1582072	Gene Expression Omnibus (GEO)	Illumina HiSeq 2000	34M spots, 3.4G bases, 1.4Gb	TDP-1, the C. elegans ortholog of TDP-43, limits the accumulation of double stranded RNA
SRR1582073	Gene Expression Omnibus (GEO)	Illumina HiSeq 2000	87.2M spots, 17.6G bases, 10.1Gb	TDP-1, the C. elegans ortholog of TDP-43, limits the accumulation of double stranded RNA
SRR1582074	Gene Expression Omnibus (GEO)	Illumina HiSeq 2000	85.1M spots, 17.2G bases, 9.8Gb	TDP-1, the C. elegans ortholog of TDP-43, limits the accumulation of double stranded RNA
SRR1582075	Gene Expression Omnibus (GEO)	Illumina HiSeq 2000	43.3M spots, 8.7G bases, 5.4Gb	TDP-1, the C. elegans ortholog of TDP-43, limits the accumulation of double stranded RNA
SRR1582076	Gene Expression Omnibus (GEO)	Illumina HiSeq 2000	89.1M spots, 17.8G bases, 11.1Gb	TDP-1, the C. elegans ortholog of TDP-43, limits the accumulation of double stranded RNA
SRR1582077	Gene Expression Omnibus (GEO)	Illumina HiSeq 2000	82.8M spots, 16.7G bases, 9.5Gb	TDP-1, the C. elegans ortholog of TDP-43, limits the accumulation of double stranded RNA
SRR1582078	Gene Expression Omnibus (GEO)	Illumina HiSeq 2000	37.1M spots, 7.4G bases, 4.6Gb	TDP-1, the C. elegans ortholog of TDP-43, limits the accumulation of double stranded RNA
SRR1582079	Gene Expression Omnibus (GEO)	Illumina HiSeq 2000	24.2M spots, 4.8G bases, 3Gb	TDP-1, the C. elegans ortholog of TDP-43, limits the accumulation of double stranded RNA
SRR1585277	Gene Expression Omnibus (GEO)	Illumina HiSeq 2000	40.3M spots, 6.1G bases, 3.8Gb	The RtcB RNA ligase is an essential component of the metazoan unfolded protein response.
SRR1585278	Gene Expression Omnibus (GEO)	Illumina HiSeq 2000	50.5M spots, 7.7G bases, 4.8Gb	The RtcB RNA ligase is an essential component of the metazoan unfolded protein response.
SRR1585279	Gene Expression Omnibus (GEO)	Illumina HiSeq 2000	46.1M spots, 7G bases, 4.4Gb	The RtcB RNA ligase is an essential component of the metazoan unfolded protein response.
SRR1585280	Gene Expression Omnibus (GEO)	Illumina HiSeq 2000	47.1M spots, 7.2G bases, 4.5Gb	The RtcB RNA ligase is an essential component of the metazoan unfolded protein response.
SRR1611854	University of Washington Genome Sciences (UWGS-RW)	Illumina HiSeq 2000	6M spots, 1.2G bases, 694.1Mb	Deep sequencing of the Caenorhabditis elegans transcriptome using RNA isolated from various developmental stages under various experimental conditions RW0001
SRR1657113	Gene Expression Omnibus (GEO)	Illumina HiSeq 2000	15.6M spots, 3.1G bases, 1.9Gb	A variety of Dicer substrates in human and C. elegans (CEL RNA-seq)
SRR1657114	Gene Expression Omnibus (GEO)	Illumina HiSeq 2000	17.7M spots, 3.6G bases, 2.1Gb	A variety of Dicer substrates in human and C. elegans (CEL RNA-seq)
SRR1657115	Gene Expression Omnibus (GEO)	Illumina HiSeq 2000	18.5M spots, 3.7G bases, 2.2Gb	A variety of Dicer substrates in human and C. elegans (CEL RNA-seq)
SRR1658963	Gene Expression Omnibus (GEO)	Illumina HiSeq 2000	16.8M spots, 1.7G bases, 1,003.6Mb	Suppression of Transcriptional Drift Extends C. elegans Lifespan by Postponing the Onset of Mortality
SRR1658964	Gene Expression Omnibus (GEO)	Illumina HiSeq 2000	29.2M spots, 2.9G bases, 1.7Gb	Suppression of Transcriptional Drift Extends C. elegans Lifespan by Postponing the Onset of Mortality
SRR1658965	Gene Expression Omnibus (GEO)	Illumina HiSeq 2000	23.9M spots, 2.4G bases, 1.4Gb	Suppression of Transcriptional Drift Extends C. elegans Lifespan by Postponing the Onset of Mortality
SRR1658966	Gene Expression Omnibus (GEO)	Illumina HiSeq 2000	25.5M spots, 2.5G bases, 1.4Gb	Suppression of Transcriptional Drift Extends C. elegans Lifespan by Postponing the Onset of Mortality
SRR1658967	Gene Expression Omnibus (GEO)	Illumina HiSeq 2000	23.6M spots, 2.4G bases, 1.3Gb	Suppression of Transcriptional Drift Extends C. elegans Lifespan by Postponing the Onset of Mortality
SRR1658968	Gene Expression Omnibus (GEO)	Illumina HiSeq 2000	38.5M spots, 3.8G bases, 2.2Gb	Suppression of Transcriptional Drift Extends C. elegans Lifespan by Postponing the Onset of Mortality
SRR1658969	Gene Expression Omnibus (GEO)	Illumina HiSeq 2000	25M spots, 2.5G bases, 1.5Gb	Suppression of Transcriptional Drift Extends C. elegans Lifespan by Postponing the Onset of Mortality
SRR1658970	Gene Expression Omnibus (GEO)	Illumina HiSeq 2000	31.6M spots, 3.2G bases, 1.8Gb	Suppression of Transcriptional Drift Extends C. elegans Lifespan by Postponing the Onset of Mortality
SRR1658971	Gene Expression Omnibus (GEO)	Illumina HiSeq 2000	21.1M spots, 2.1G bases, 1.3Gb	Suppression of Transcriptional Drift Extends C. elegans Lifespan by Postponing the Onset of Mortality
SRR1658972	Gene Expression Omnibus (GEO)	Illumina HiSeq 2000	31M spots, 3.1G bases, 1.8Gb	Suppression of Transcriptional Drift Extends C. elegans Lifespan by Postponing the Onset of Mortality
SRR1658973	Gene Expression Omnibus (GEO)	Illumina HiSeq 2000	27.7M spots, 2.8G bases, 1.6Gb	Suppression of Transcriptional Drift Extends C. elegans Lifespan by Postponing the Onset of Mortality
SRR1658974	Gene Expression Omnibus (GEO)	Illumina HiSeq 2000	27.7M spots, 2.8G bases, 1.6Gb	Suppression of Transcriptional Drift Extends C. elegans Lifespan by Postponing the Onset of Mortality
SRR1658975	Gene Expression Omnibus (GEO)	Illumina HiSeq 2000	22.5M spots, 2.3G bases, 1.2Gb	Suppression of Transcriptional Drift Extends C. elegans Lifespan by Postponing the Onset of Mortality
SRR1658976	Gene Expression Omnibus (GEO)	Illumina HiSeq 2000	17.9M spots, 1.8G bases, 1,007.7Mb	Suppression of Transcriptional Drift Extends C. elegans Lifespan by Postponing the Onset of Mortality
SRR1658977	Gene Expression Omnibus (GEO)	Illumina HiSeq 2000	20.7M spots, 2.1G bases, 1.2Gb	Suppression of Transcriptional Drift Extends C. elegans Lifespan by Postponing the Onset of Mortality
SRR1658978	Gene Expression Omnibus (GEO)	Illumina HiSeq 2000	26.1M spots, 2.6G bases, 1.4Gb	Suppression of Transcriptional Drift Extends C. elegans Lifespan by Postponing the Onset of Mortality
SRR1658979	Gene Expression Omnibus (GEO)	Illumina HiSeq 2000	19.1M spots, 1.9G bases, 1.1Gb	Suppression of Transcriptional Drift Extends C. elegans Lifespan by Postponing the Onset of Mortality
SRR1658980	Gene Expression Omnibus (GEO)	Illumina HiSeq 2000	26.7M spots, 2.7G bases, 1.4Gb	Suppression of Transcriptional Drift Extends C. elegans Lifespan by Postponing the Onset of Mortality
SRR1658981	Gene Expression Omnibus (GEO)	Illumina HiSeq 2000	18.3M spots, 1.8G bases, 1,001.9Mb	Suppression of Transcriptional Drift Extends C. elegans Lifespan by Postponing the Onset of Mortality
SRR1658982	Gene Expression Omnibus (GEO)	Illumina HiSeq 2000	18.4M spots, 1.8G bases, 1Gb	Suppression of Transcriptional Drift Extends C. elegans Lifespan by Postponing the Onset of Mortality
SRR1658983	Gene Expression Omnibus (GEO)	Illumina HiSeq 2000	19.9M spots, 2G bases, 1.1Gb	Suppression of Transcriptional Drift Extends C. elegans Lifespan by Postponing the Onset of Mortality
SRR1658984	Gene Expression Omnibus (GEO)	Illumina HiSeq 2000	27.1M spots, 2.7G bases, 1.4Gb	Suppression of Transcriptional Drift Extends C. elegans Lifespan by Postponing the Onset of Mortality
SRR1658985	Gene Expression Omnibus (GEO)	Illumina HiSeq 2000	23.3M spots, 2.3G bases, 1.2Gb	Suppression of Transcriptional Drift Extends C. elegans Lifespan by Postponing the Onset of Mortality
SRR1658986	Gene Expression Omnibus (GEO)	Illumina HiSeq 2000	16.4M spots, 1.6G bases, 905.4Mb	Suppression of Transcriptional Drift Extends C. elegans Lifespan by Postponing the Onset of Mortality
SRR1658987	Gene Expression Omnibus (GEO)	Illumina HiSeq 2000	21.9M spots, 2.2G bases, 1.3Gb	Suppression of Transcriptional Drift Extends C. elegans Lifespan by Postponing the Onset of Mortality
SRR1658988	Gene Expression Omnibus (GEO)	Illumina HiSeq 2000	19.6M spots, 2G bases, 1.2Gb	Suppression of Transcriptional Drift Extends C. elegans Lifespan by Postponing the Onset of Mortality
SRR1658989	Gene Expression Omnibus (GEO)	Illumina HiSeq 2000	33M spots, 3.3G bases, 2Gb	Suppression of Transcriptional Drift Extends C. elegans Lifespan by Postponing the Onset of Mortality
SRR1658990	Gene Expression Omnibus (GEO)	Illumina HiSeq 2000	n/a	Suppression of Transcriptional Drift Extends C. elegans Lifespan by Postponing the Onset of Mortality
SRR1658991	Gene Expression Omnibus (GEO)	Illumina HiSeq 2000	n/a	Suppression of Transcriptional Drift Extends C. elegans Lifespan by Postponing the Onset of Mortality
SRR1658992	Gene Expression Omnibus (GEO)	Illumina HiSeq 2000	19M spots, 1.9G bases, 1.1Gb	Suppression of Transcriptional Drift Extends C. elegans Lifespan by Postponing the Onset of Mortality
SRR1658993	Gene Expression Omnibus (GEO)	Illumina HiSeq 2000	21.8M spots, 2.2G bases, 1.3Gb	Suppression of Transcriptional Drift Extends C. elegans Lifespan by Postponing the Onset of Mortality
SRR1658994	Gene Expression Omnibus (GEO)	Illumina HiSeq 2000	n/a	Suppression of Transcriptional Drift Extends C. elegans Lifespan by Postponing the Onset of Mortality
SRR1658995	Gene Expression Omnibus (GEO)	Illumina HiSeq 2000	n/a	Suppression of Transcriptional Drift Extends C. elegans Lifespan by Postponing the Onset of Mortality
SRR1658996	Gene Expression Omnibus (GEO)	Illumina HiSeq 2000	n/a	Suppression of Transcriptional Drift Extends C. elegans Lifespan by Postponing the Onset of Mortality
SRR1658997	Gene Expression Omnibus (GEO)	Illumina HiSeq 2000	n/a	Suppression of Transcriptional Drift Extends C. elegans Lifespan by Postponing the Onset of Mortality
SRR1658998	Gene Expression Omnibus (GEO)	Illumina HiSeq 2000	n/a	Suppression of Transcriptional Drift Extends C. elegans Lifespan by Postponing the Onset of Mortality
SRR1658999	Gene Expression Omnibus (GEO)	Illumina HiSeq 2000	n/a	Suppression of Transcriptional Drift Extends C. elegans Lifespan by Postponing the Onset of Mortality
SRR1659000	Gene Expression Omnibus (GEO)	Illumina HiSeq 2000	n/a	Suppression of Transcriptional Drift Extends C. elegans Lifespan by Postponing the Onset of Mortality
SRR1659001	Gene Expression Omnibus (GEO)	Illumina HiSeq 2000	n/a	Suppression of Transcriptional Drift Extends C. elegans Lifespan by Postponing the Onset of Mortality
SRR1659002	Gene Expression Omnibus (GEO)	Illumina HiSeq 2000	n/a	Suppression of Transcriptional Drift Extends C. elegans Lifespan by Postponing the Onset of Mortality
SRR1659003	Gene Expression Omnibus (GEO)	Illumina HiSeq 2000	n/a	Suppression of Transcriptional Drift Extends C. elegans Lifespan by Postponing the Onset of Mortality
SRR1659004	Gene Expression Omnibus (GEO)	Illumina HiSeq 2000	n/a	Suppression of Transcriptional Drift Extends C. elegans Lifespan by Postponing the Onset of Mortality
SRR1659005	Gene Expression Omnibus (GEO)	Illumina HiSeq 2000	n/a	Suppression of Transcriptional Drift Extends C. elegans Lifespan by Postponing the Onset of Mortality
SRR1692361	Gene Expression Omnibus (GEO)	Illumina HiSeq 2000	12.2M spots, 1.2G bases, 699.6Mb	Analysis of intron sequences reveals hallmarks of circular RNA biogenesis in animals
SRR1692362	Gene Expression Omnibus (GEO)	Illumina HiSeq 2000	28.3M spots, 2.9G bases, 1.6Gb	Analysis of intron sequences reveals hallmarks of circular RNA biogenesis in animals
SRR1692363	Gene Expression Omnibus (GEO)	Illumina HiSeq 2000	21.1M spots, 2.1G bases, 1.2Gb	Analysis of intron sequences reveals hallmarks of circular RNA biogenesis in animals
SRR1692364	Gene Expression Omnibus (GEO)	Illumina HiSeq 2000	26.3M spots, 2.7G bases, 1.5Gb	Analysis of intron sequences reveals hallmarks of circular RNA biogenesis in animals
SRR1692365	Gene Expression Omnibus (GEO)	Illumina HiSeq 2000	15.7M spots, 1.6G bases, 895.1Mb	Analysis of intron sequences reveals hallmarks of circular RNA biogenesis in animals
SRR1692366	Gene Expression Omnibus (GEO)	Illumina HiSeq 2000	25.1M spots, 2.5G bases, 1.4Gb	Analysis of intron sequences reveals hallmarks of circular RNA biogenesis in animals
SRR1692367	Gene Expression Omnibus (GEO)	Illumina HiSeq 2000	18.2M spots, 1.8G bases, 1Gb	Analysis of intron sequences reveals hallmarks of circular RNA biogenesis in animals
SRR1692368	Gene Expression Omnibus (GEO)	Illumina HiSeq 2000	25.8M spots, 2.6G bases, 1.4Gb	Analysis of intron sequences reveals hallmarks of circular RNA biogenesis in animals
SRR1692369	Gene Expression Omnibus (GEO)	Illumina HiSeq 2000	18.9M spots, 1.9G bases, 1Gb	Analysis of intron sequences reveals hallmarks of circular RNA biogenesis in animals
SRR1692370	Gene Expression Omnibus (GEO)	Illumina HiSeq 2000	22.4M spots, 2.3G bases, 1.2Gb	Analysis of intron sequences reveals hallmarks of circular RNA biogenesis in animals
SRR1692371	Gene Expression Omnibus (GEO)	Illumina HiSeq 2000	16.9M spots, 1.7G bases, 962.6Mb	Analysis of intron sequences reveals hallmarks of circular RNA biogenesis in animals
SRR1692372	Gene Expression Omnibus (GEO)	Illumina HiSeq 2000	26.9M spots, 2.7G bases, 1.5Gb	Analysis of intron sequences reveals hallmarks of circular RNA biogenesis in animals
SRR1727796	Gene Expression Omnibus (GEO)	Illumina HiSeq 2000	23.3M spots, 4.7G bases, 3.1Gb	Overlapping and unique signatures in the proteomic and transcriptomic responses of the nematode Caenorhabditis elegans towards pathogenic Bacillus thuringiensis
SRR1727797	Gene Expression Omnibus (GEO)	Illumina HiSeq 2000	19.2M spots, 3.9G bases, 2.5Gb	Overlapping and unique signatures in the proteomic and transcriptomic responses of the nematode Caenorhabditis elegans towards pathogenic Bacillus thuringiensis
SRR1727798	Gene Expression Omnibus (GEO)	Illumina HiSeq 2000	33.9M spots, 6.8G bases, 4.4Gb	Overlapping and unique signatures in the proteomic and transcriptomic responses of the nematode Caenorhabditis elegans towards pathogenic Bacillus thuringiensis
SRR1727799	Gene Expression Omnibus (GEO)	Illumina HiSeq 2000	34.9M spots, 7G bases, 4.6Gb	Overlapping and unique signatures in the proteomic and transcriptomic responses of the nematode Caenorhabditis elegans towards pathogenic Bacillus thuringiensis
SRR1727800	Gene Expression Omnibus (GEO)	Illumina HiSeq 2000	28.9M spots, 5.8G bases, 3.8Gb	Overlapping and unique signatures in the proteomic and transcriptomic responses of the nematode Caenorhabditis elegans towards pathogenic Bacillus thuringiensis
SRR1727801	Gene Expression Omnibus (GEO)	Illumina HiSeq 2000	24.8M spots, 5G bases, 3.2Gb	Overlapping and unique signatures in the proteomic and transcriptomic responses of the nematode Caenorhabditis elegans towards pathogenic Bacillus thuringiensis
SRR1727802	Gene Expression Omnibus (GEO)	Illumina HiSeq 2000	22.7M spots, 4.6G bases, 3Gb	Overlapping and unique signatures in the proteomic and transcriptomic responses of the nematode Caenorhabditis elegans towards pathogenic Bacillus thuringiensis
SRR1727803	Gene Expression Omnibus (GEO)	Illumina HiSeq 2000	27M spots, 5.5G bases, 3.5Gb	Overlapping and unique signatures in the proteomic and transcriptomic responses of the nematode Caenorhabditis elegans towards pathogenic Bacillus thuringiensis
SRR1727804	Gene Expression Omnibus (GEO)	Illumina HiSeq 2000	35.1M spots, 7.1G bases, 4.6Gb	Overlapping and unique signatures in the proteomic and transcriptomic responses of the nematode Caenorhabditis elegans towards pathogenic Bacillus thuringiensis
SRR1727805	Gene Expression Omnibus (GEO)	Illumina HiSeq 2000	31.8M spots, 6.4G bases, 4.2Gb	Overlapping and unique signatures in the proteomic and transcriptomic responses of the nematode Caenorhabditis elegans towards pathogenic Bacillus thuringiensis
SRR1727806	Gene Expression Omnibus (GEO)	Illumina HiSeq 2000	35.5M spots, 7.2G bases, 4.6Gb	Overlapping and unique signatures in the proteomic and transcriptomic responses of the nematode Caenorhabditis elegans towards pathogenic Bacillus thuringiensis
SRR1727807	Gene Expression Omnibus (GEO)	Illumina HiSeq 2000	24.2M spots, 4.9G bases, 3.2Gb	Overlapping and unique signatures in the proteomic and transcriptomic responses of the nematode Caenorhabditis elegans towards pathogenic Bacillus thuringiensis
SRR1727808	Gene Expression Omnibus (GEO)	Illumina HiSeq 2000	27M spots, 5.5G bases, 3.5Gb	Overlapping and unique signatures in the proteomic and transcriptomic responses of the nematode Caenorhabditis elegans towards pathogenic Bacillus thuringiensis
SRR1727809	Gene Expression Omnibus (GEO)	Illumina HiSeq 2000	21.9M spots, 4.4G bases, 2.9Gb	Overlapping and unique signatures in the proteomic and transcriptomic responses of the nematode Caenorhabditis elegans towards pathogenic Bacillus thuringiensis
SRR1727810	Gene Expression Omnibus (GEO)	Illumina HiSeq 2000	34M spots, 6.9G bases, 4.5Gb	Overlapping and unique signatures in the proteomic and transcriptomic responses of the nematode Caenorhabditis elegans towards pathogenic Bacillus thuringiensis
SRR1727811	Gene Expression Omnibus (GEO)	Illumina HiSeq 2000	28.9M spots, 5.8G bases, 3.8Gb	Overlapping and unique signatures in the proteomic and transcriptomic responses of the nematode Caenorhabditis elegans towards pathogenic Bacillus thuringiensis
SRR1727812	Gene Expression Omnibus (GEO)	Illumina HiSeq 2000	30.8M spots, 6.2G bases, 4Gb	Overlapping and unique signatures in the proteomic and transcriptomic responses of the nematode Caenorhabditis elegans towards pathogenic Bacillus thuringiensis
SRR1727813	Gene Expression Omnibus (GEO)	Illumina HiSeq 2000	31.5M spots, 6.4G bases, 4.1Gb	Overlapping and unique signatures in the proteomic and transcriptomic responses of the nematode Caenorhabditis elegans towards pathogenic Bacillus thuringiensis
SRR1727814	Gene Expression Omnibus (GEO)	Illumina HiSeq 2000	20.5M spots, 4.1G bases, 2.7Gb	Overlapping and unique signatures in the proteomic and transcriptomic responses of the nematode Caenorhabditis elegans towards pathogenic Bacillus thuringiensis
SRR1727815	Gene Expression Omnibus (GEO)	Illumina HiSeq 2000	24.3M spots, 4.9G bases, 3.2Gb	Overlapping and unique signatures in the proteomic and transcriptomic responses of the nematode Caenorhabditis elegans towards pathogenic Bacillus thuringiensis
SRR1727816	Gene Expression Omnibus (GEO)	Illumina HiSeq 2000	39M spots, 7.9G bases, 5.1Gb	Overlapping and unique signatures in the proteomic and transcriptomic responses of the nematode Caenorhabditis elegans towards pathogenic Bacillus thuringiensis
SRR1727817	Gene Expression Omnibus (GEO)	Illumina HiSeq 2000	21.4M spots, 4.3G bases, 2.8Gb	Overlapping and unique signatures in the proteomic and transcriptomic responses of the nematode Caenorhabditis elegans towards pathogenic Bacillus thuringiensis
SRR1727818	Gene Expression Omnibus (GEO)	Illumina HiSeq 2000	32.3M spots, 6.5G bases, 4.2Gb	Overlapping and unique signatures in the proteomic and transcriptomic responses of the nematode Caenorhabditis elegans towards pathogenic Bacillus thuringiensis
SRR1727819	Gene Expression Omnibus (GEO)	Illumina HiSeq 2000	31.9M spots, 6.4G bases, 4.2Gb	Overlapping and unique signatures in the proteomic and transcriptomic responses of the nematode Caenorhabditis elegans towards pathogenic Bacillus thuringiensis
SRR1741330	Gene Expression Omnibus (GEO)	Illumina HiSeq 2000	57.5M spots, 5.7G bases, 3.5Gb	mRNA profiling of wildtype, germline depleted, NMD mutant C. elegans whole worms and wildtype dissected gonads
SRR1741331	Gene Expression Omnibus (GEO)	Illumina HiSeq 2000	57.2M spots, 5.7G bases, 3.5Gb	mRNA profiling of wildtype, germline depleted, NMD mutant C. elegans whole worms and wildtype dissected gonads
SRR1741332	Gene Expression Omnibus (GEO)	Illumina HiSeq 2000	36.2M spots, 3.6G bases, 2.2Gb	mRNA profiling of wildtype, germline depleted, NMD mutant C. elegans whole worms and wildtype dissected gonads
SRR1741333	Gene Expression Omnibus (GEO)	Illumina HiSeq 2000	32.3M spots, 3.2G bases, 2.1Gb	mRNA profiling of wildtype, germline depleted, NMD mutant C. elegans whole worms and wildtype dissected gonads
SRR1741334	Gene Expression Omnibus (GEO)	Illumina HiSeq 2000	45.6M spots, 4.6G bases, 3Gb	mRNA profiling of wildtype, germline depleted, NMD mutant C. elegans whole worms and wildtype dissected gonads
SRR1746094	Arizona State University	Illumina HiSeq 2000	18.1M spots, 3.6G bases, 1.5Gb	Caenorhabditis elegans PAT-Seq of Intestine, pharynx and body muscle transcriptomes
SRR1746094	Arizona State University	Illumina HiSeq 2000	18.1M spots, 3.6G bases, 1.5Gb	Caenorhabditis elegans PAT-Seq of Intestine, pharynx and body muscle transcriptomes
SRR1746094	Arizona State University	Illumina HiSeq 2000	18.1M spots, 3.6G bases, 1.5Gb	Caenorhabditis elegans PAT-Seq of Intestine, pharynx and body muscle transcriptomes
SRR1746748	Arizona State University	Illumina HiSeq 2000	15.1M spots, 3G bases, 1.6Gb	Caenorhabditis elegans PAT-Seq of Intestine, pharynx and body muscle transcriptomes
SRR1746749	Arizona State University	Illumina HiSeq 2000	12.8M spots, 2.6G bases, 1,007Mb	Caenorhabditis elegans PAT-Seq of Intestine, pharynx and body muscle transcriptomes
SRR1746750	Arizona State University	Illumina HiSeq 2000	12M spots, 2.4G bases, 984.1Mb	Caenorhabditis elegans PAT-Seq of Intestine, pharynx and body muscle transcriptomes
SRR1746751	Arizona State University	Illumina HiSeq 2000	13.1M spots, 2.6G bases, 1.1Gb	Caenorhabditis elegans PAT-Seq of Intestine, pharynx and body muscle transcriptomes
SRR1746752	Arizona State University	Illumina HiSeq 2000	13M spots, 2.6G bases, 1Gb	Caenorhabditis elegans PAT-Seq of Intestine, pharynx and body muscle transcriptomes
SRR1976525	Gene Expression Omnibus (GEO)	Illumina HiSeq 2500	n/a	CSR-1 and P granules suppress sperm-specific transcription in the C. elegans germline
SRR1976526	Gene Expression Omnibus (GEO)	Illumina HiSeq 2500	n/a	CSR-1 and P granules suppress sperm-specific transcription in the C. elegans germline
SRR1976527	Gene Expression Omnibus (GEO)	Illumina HiSeq 2500	n/a	CSR-1 and P granules suppress sperm-specific transcription in the C. elegans germline
SRR1976528	Gene Expression Omnibus (GEO)	Illumina HiSeq 2500	n/a	CSR-1 and P granules suppress sperm-specific transcription in the C. elegans germline
SRR1976529	Gene Expression Omnibus (GEO)	Illumina HiSeq 2500	n/a	CSR-1 and P granules suppress sperm-specific transcription in the C. elegans germline
SRR1976530	Gene Expression Omnibus (GEO)	Illumina HiSeq 2500	n/a	CSR-1 and P granules suppress sperm-specific transcription in the C. elegans germline
SRR1976531	Gene Expression Omnibus (GEO)	Illumina HiSeq 2500	n/a	CSR-1 and P granules suppress sperm-specific transcription in the C. elegans germline
SRR1976532	Gene Expression Omnibus (GEO)	Illumina HiSeq 2500	n/a	CSR-1 and P granules suppress sperm-specific transcription in the C. elegans germline
SRR1976533	Gene Expression Omnibus (GEO)	Illumina HiSeq 2500	n/a	CSR-1 and P granules suppress sperm-specific transcription in the C. elegans germline
SRR1976534	Gene Expression Omnibus (GEO)	Illumina HiSeq 2500	n/a	CSR-1 and P granules suppress sperm-specific transcription in the C. elegans germline
SRR1976535	Gene Expression Omnibus (GEO)	Illumina HiSeq 2500	n/a	CSR-1 and P granules suppress sperm-specific transcription in the C. elegans germline
SRR1976536	Gene Expression Omnibus (GEO)	Illumina HiSeq 2500	n/a	CSR-1 and P granules suppress sperm-specific transcription in the C. elegans germline
SRR1999355	Gene Expression Omnibus (GEO)	Illumina Genome Analyzer IIx	13.7M spots, 1.4G bases, 1,013.5Mb	RNA sequencing of C. elegans lsm-1(tm3585) mutants at L3 stage
SRR1999356	Gene Expression Omnibus (GEO)	Illumina Genome Analyzer IIx	10.8M spots, 1.1G bases, 783.8Mb	RNA sequencing of C. elegans lsm-1(tm3585) mutants at L3 stage
SRR2012769	University of Washington Genome Sciences (UWGS-RW)	Illumina HiSeq 2000	n/a	Deep sequencing of the Caenorhabditis elegans transcriptome using RNA isolated from various developmental stages under various experimental conditions RW0001
SRR2012770	University of Washington Genome Sciences (UWGS-RW)	Illumina HiSeq 2000	n/a	Deep sequencing of the Caenorhabditis elegans transcriptome using RNA isolated from various developmental stages under various experimental conditions RW0001
SRR2012771	University of Washington Genome Sciences (UWGS-RW)	Illumina HiSeq 2000	n/a	Deep sequencing of the Caenorhabditis elegans transcriptome using RNA isolated from various developmental stages under various experimental conditions RW0001
SRR2012775	University of Washington Genome Sciences (UWGS-RW)	Illumina HiSeq 2000	n/a	Deep sequencing of the Caenorhabditis elegans transcriptome using RNA isolated from various developmental stages under various experimental conditions RW0001
SRR2012776	University of Washington Genome Sciences (UWGS-RW)	Illumina HiSeq 2000	n/a	Deep sequencing of the Caenorhabditis elegans transcriptome using RNA isolated from various developmental stages under various experimental conditions RW0001
SRR2012777	University of Washington Genome Sciences (UWGS-RW)	Illumina HiSeq 2000	n/a	Deep sequencing of the Caenorhabditis elegans transcriptome using RNA isolated from various developmental stages under various experimental conditions RW0001
SRR2012779	University of Washington Genome Sciences (UWGS-RW)	Illumina HiSeq 2000	n/a	Deep sequencing of the Caenorhabditis elegans transcriptome using RNA isolated from various developmental stages under various experimental conditions RW0001
SRR2012780	University of Washington Genome Sciences (UWGS-RW)	Illumina HiSeq 2000	n/a	Deep sequencing of the Caenorhabditis elegans transcriptome using RNA isolated from various developmental stages under various experimental conditions RW0001
SRR2012781	University of Washington Genome Sciences (UWGS-RW)	Illumina HiSeq 2000	n/a	Deep sequencing of the Caenorhabditis elegans transcriptome using RNA isolated from various developmental stages under various experimental conditions RW0001
SRR2012783	University of Washington Genome Sciences (UWGS-RW)	Illumina HiSeq 2000	n/a	Deep sequencing of the Caenorhabditis elegans transcriptome using RNA isolated from various developmental stages under various experimental conditions RW0001
SRR2012784	University of Washington Genome Sciences (UWGS-RW)	Illumina HiSeq 2000	n/a	Deep sequencing of the Caenorhabditis elegans transcriptome using RNA isolated from various developmental stages under various experimental conditions RW0001
SRR2012785	University of Washington Genome Sciences (UWGS-RW)	Illumina HiSeq 2000	n/a	Deep sequencing of the Caenorhabditis elegans transcriptome using RNA isolated from various developmental stages under various experimental conditions RW0001
SRR2012787	University of Washington Genome Sciences (UWGS-RW)	Illumina HiSeq 2000	n/a	Deep sequencing of the Caenorhabditis elegans transcriptome using RNA isolated from various developmental stages under various experimental conditions RW0001
SRR2012788	University of Washington Genome Sciences (UWGS-RW)	Illumina HiSeq 2000	n/a	Deep sequencing of the Caenorhabditis elegans transcriptome using RNA isolated from various developmental stages under various experimental conditions RW0001
SRR2012789	University of Washington Genome Sciences (UWGS-RW)	Illumina HiSeq 2000	n/a	Deep sequencing of the Caenorhabditis elegans transcriptome using RNA isolated from various developmental stages under various experimental conditions RW0001
SRR2012791	University of Washington Genome Sciences (UWGS-RW)	Illumina HiSeq 2000	n/a	Deep sequencing of the Caenorhabditis elegans transcriptome using RNA isolated from various developmental stages under various experimental conditions RW0001
SRR2012792	University of Washington Genome Sciences (UWGS-RW)	Illumina HiSeq 2000	n/a	Deep sequencing of the Caenorhabditis elegans transcriptome using RNA isolated from various developmental stages under various experimental conditions RW0001
SRR2012793	University of Washington Genome Sciences (UWGS-RW)	Illumina HiSeq 2000	n/a	Deep sequencing of the Caenorhabditis elegans transcriptome using RNA isolated from various developmental stages under various experimental conditions RW0001
SRR2015247	University of Washington Genome Sciences (UWGS-RW)	Illumina HiSeq 2000	n/a	Deep sequencing of the Caenorhabditis elegans transcriptome using RNA isolated from various developmental stages under various experimental conditions RW0001
SRR2015248	University of Washington Genome Sciences (UWGS-RW)	Illumina HiSeq 2000	n/a	Deep sequencing of the Caenorhabditis elegans transcriptome using RNA isolated from various developmental stages under various experimental conditions RW0001
SRR2015249	University of Washington Genome Sciences (UWGS-RW)	Illumina HiSeq 2000	n/a	Deep sequencing of the Caenorhabditis elegans transcriptome using RNA isolated from various developmental stages under various experimental conditions RW0001
SRR2015251	University of Washington Genome Sciences (UWGS-RW)	Illumina HiSeq 2000	n/a	Deep sequencing of the Caenorhabditis elegans transcriptome using RNA isolated from various developmental stages under various experimental conditions RW0001
SRR2015252	University of Washington Genome Sciences (UWGS-RW)	Illumina HiSeq 2000	n/a	Deep sequencing of the Caenorhabditis elegans transcriptome using RNA isolated from various developmental stages under various experimental conditions RW0001
SRR2015253	University of Washington Genome Sciences (UWGS-RW)	Illumina HiSeq 2000	n/a	Deep sequencing of the Caenorhabditis elegans transcriptome using RNA isolated from various developmental stages under various experimental conditions RW0001
SRR2015255	University of Washington Genome Sciences (UWGS-RW)	Illumina HiSeq 2000	n/a	Deep sequencing of the Caenorhabditis elegans transcriptome using RNA isolated from various developmental stages under various experimental conditions RW0001
SRR2015256	University of Washington Genome Sciences (UWGS-RW)	Illumina HiSeq 2000	n/a	Deep sequencing of the Caenorhabditis elegans transcriptome using RNA isolated from various developmental stages under various experimental conditions RW0001
SRR2015257	University of Washington Genome Sciences (UWGS-RW)	Illumina HiSeq 2000	n/a	Deep sequencing of the Caenorhabditis elegans transcriptome using RNA isolated from various developmental stages under various experimental conditions RW0001
SRR2015260	University of Washington Genome Sciences (UWGS-RW)	Illumina HiSeq 2000	n/a	Deep sequencing of the Caenorhabditis elegans transcriptome using RNA isolated from various developmental stages under various experimental conditions RW0001
SRR2015261	University of Washington Genome Sciences (UWGS-RW)	Illumina HiSeq 2000	n/a	Deep sequencing of the Caenorhabditis elegans transcriptome using RNA isolated from various developmental stages under various experimental conditions RW0001
SRR2015262	University of Washington Genome Sciences (UWGS-RW)	Illumina HiSeq 2000	n/a	Deep sequencing of the Caenorhabditis elegans transcriptome using RNA isolated from various developmental stages under various experimental conditions RW0001
SRR2015264	University of Washington Genome Sciences (UWGS-RW)	Illumina HiSeq 2000	n/a	Deep sequencing of the Caenorhabditis elegans transcriptome using RNA isolated from various developmental stages under various experimental conditions RW0001
SRR2015265	University of Washington Genome Sciences (UWGS-RW)	Illumina HiSeq 2000	n/a	Deep sequencing of the Caenorhabditis elegans transcriptome using RNA isolated from various developmental stages under various experimental conditions RW0001
SRR2015266	University of Washington Genome Sciences (UWGS-RW)	Illumina HiSeq 2000	n/a	Deep sequencing of the Caenorhabditis elegans transcriptome using RNA isolated from various developmental stages under various experimental conditions RW0001
SRR2015268	University of Washington Genome Sciences (UWGS-RW)	Illumina HiSeq 2000	n/a	Deep sequencing of the Caenorhabditis elegans transcriptome using RNA isolated from various developmental stages under various experimental conditions RW0001
SRR2015269	University of Washington Genome Sciences (UWGS-RW)	Illumina HiSeq 2000	n/a	Deep sequencing of the Caenorhabditis elegans transcriptome using RNA isolated from various developmental stages under various experimental conditions RW0001
SRR2015270	University of Washington Genome Sciences (UWGS-RW)	Illumina HiSeq 2000	n/a	Deep sequencing of the Caenorhabditis elegans transcriptome using RNA isolated from various developmental stages under various experimental conditions RW0001
SRR2015272	University of Washington Genome Sciences (UWGS-RW)	Illumina HiSeq 2000	n/a	Deep sequencing of the Caenorhabditis elegans transcriptome using RNA isolated from various developmental stages under various experimental conditions RW0001
SRR2015273	University of Washington Genome Sciences (UWGS-RW)	Illumina HiSeq 2000	n/a	Deep sequencing of the Caenorhabditis elegans transcriptome using RNA isolated from various developmental stages under various experimental conditions RW0001
SRR2015274	University of Washington Genome Sciences (UWGS-RW)	Illumina HiSeq 2000	n/a	Deep sequencing of the Caenorhabditis elegans transcriptome using RNA isolated from various developmental stages under various experimental conditions RW0001
SRR2015276	University of Washington Genome Sciences (UWGS-RW)	Illumina HiSeq 2000	n/a	Deep sequencing of the Caenorhabditis elegans transcriptome using RNA isolated from various developmental stages under various experimental conditions RW0001
SRR2015277	University of Washington Genome Sciences (UWGS-RW)	Illumina HiSeq 2000	n/a	Deep sequencing of the Caenorhabditis elegans transcriptome using RNA isolated from various developmental stages under various experimental conditions RW0001
SRR2015278	University of Washington Genome Sciences (UWGS-RW)	Illumina HiSeq 2000	n/a	Deep sequencing of the Caenorhabditis elegans transcriptome using RNA isolated from various developmental stages under various experimental conditions RW0001
SRR2015280	University of Washington Genome Sciences (UWGS-RW)	Illumina HiSeq 2000	n/a	Deep sequencing of the Caenorhabditis elegans transcriptome using RNA isolated from various developmental stages under various experimental conditions RW0001
SRR2015281	University of Washington Genome Sciences (UWGS-RW)	Illumina HiSeq 2000	n/a	Deep sequencing of the Caenorhabditis elegans transcriptome using RNA isolated from various developmental stages under various experimental conditions RW0001
SRR2015282	University of Washington Genome Sciences (UWGS-RW)	Illumina HiSeq 2000	n/a	Deep sequencing of the Caenorhabditis elegans transcriptome using RNA isolated from various developmental stages under various experimental conditions RW0001
SRR2015284	University of Washington Genome Sciences (UWGS-RW)	Illumina HiSeq 2000	n/a	Deep sequencing of the Caenorhabditis elegans transcriptome using RNA isolated from various developmental stages under various experimental conditions RW0001
SRR2015285	University of Washington Genome Sciences (UWGS-RW)	Illumina HiSeq 2000	n/a	Deep sequencing of the Caenorhabditis elegans transcriptome using RNA isolated from various developmental stages under various experimental conditions RW0001
SRR2015286	University of Washington Genome Sciences (UWGS-RW)	Illumina HiSeq 2000	n/a	Deep sequencing of the Caenorhabditis elegans transcriptome using RNA isolated from various developmental stages under various experimental conditions RW0001
SRR2015288	University of Washington Genome Sciences (UWGS-RW)	Illumina HiSeq 2000	n/a	Deep sequencing of the Caenorhabditis elegans transcriptome using RNA isolated from various developmental stages under various experimental conditions RW0001
SRR2015289	University of Washington Genome Sciences (UWGS-RW)	Illumina HiSeq 2000	n/a	Deep sequencing of the Caenorhabditis elegans transcriptome using RNA isolated from various developmental stages under various experimental conditions RW0001
SRR2015290	University of Washington Genome Sciences (UWGS-RW)	Illumina HiSeq 2000	n/a	Deep sequencing of the Caenorhabditis elegans transcriptome using RNA isolated from various developmental stages under various experimental conditions RW0001
SRR2015292	University of Washington Genome Sciences (UWGS-RW)	Illumina HiSeq 2000	n/a	Deep sequencing of the Caenorhabditis elegans transcriptome using RNA isolated from various developmental stages under various experimental conditions RW0001
SRR2015293	University of Washington Genome Sciences (UWGS-RW)	Illumina HiSeq 2000	n/a	Deep sequencing of the Caenorhabditis elegans transcriptome using RNA isolated from various developmental stages under various experimental conditions RW0001
SRR2015294	University of Washington Genome Sciences (UWGS-RW)	Illumina HiSeq 2000	n/a	Deep sequencing of the Caenorhabditis elegans transcriptome using RNA isolated from various developmental stages under various experimental conditions RW0001
SRR2015298	University of Washington Genome Sciences (UWGS-RW)	Illumina HiSeq 2000	n/a	Deep sequencing of the Caenorhabditis elegans transcriptome using RNA isolated from various developmental stages under various experimental conditions RW0001
SRR2015299	University of Washington Genome Sciences (UWGS-RW)	Illumina HiSeq 2000	n/a	Deep sequencing of the Caenorhabditis elegans transcriptome using RNA isolated from various developmental stages under various experimental conditions RW0001
SRR2015300	University of Washington Genome Sciences (UWGS-RW)	Illumina HiSeq 2000	n/a	Deep sequencing of the Caenorhabditis elegans transcriptome using RNA isolated from various developmental stages under various experimental conditions RW0001
SRR2015303	University of Washington Genome Sciences (UWGS-RW)	Illumina HiSeq 2000	n/a	Deep sequencing of the Caenorhabditis elegans transcriptome using RNA isolated from various developmental stages under various experimental conditions RW0001
SRR2015304	University of Washington Genome Sciences (UWGS-RW)	Illumina HiSeq 2000	n/a	Deep sequencing of the Caenorhabditis elegans transcriptome using RNA isolated from various developmental stages under various experimental conditions RW0001
SRR2015305	University of Washington Genome Sciences (UWGS-RW)	Illumina HiSeq 2000	n/a	Deep sequencing of the Caenorhabditis elegans transcriptome using RNA isolated from various developmental stages under various experimental conditions RW0001
SRR2015307	University of Washington Genome Sciences (UWGS-RW)	Illumina HiSeq 2000	n/a	Deep sequencing of the Caenorhabditis elegans transcriptome using RNA isolated from various developmental stages under various experimental conditions RW0001
SRR2015308	University of Washington Genome Sciences (UWGS-RW)	Illumina HiSeq 2000	n/a	Deep sequencing of the Caenorhabditis elegans transcriptome using RNA isolated from various developmental stages under various experimental conditions RW0001
SRR2015309	University of Washington Genome Sciences (UWGS-RW)	Illumina HiSeq 2000	n/a	Deep sequencing of the Caenorhabditis elegans transcriptome using RNA isolated from various developmental stages under various experimental conditions RW0001
SRR2015310	University of Washington Genome Sciences (UWGS-RW)	Illumina HiSeq 2000	n/a	Deep sequencing of the Caenorhabditis elegans transcriptome using RNA isolated from various developmental stages under various experimental conditions RW0001
SRR2015311	University of Washington Genome Sciences (UWGS-RW)	Illumina HiSeq 2000	n/a	Deep sequencing of the Caenorhabditis elegans transcriptome using RNA isolated from various developmental stages under various experimental conditions RW0001
SRR2015312	University of Washington Genome Sciences (UWGS-RW)	Illumina HiSeq 2000	n/a	Deep sequencing of the Caenorhabditis elegans transcriptome using RNA isolated from various developmental stages under various experimental conditions RW0001
SRR2015313	University of Washington Genome Sciences (UWGS-RW)	Illumina HiSeq 2000	n/a	Deep sequencing of the Caenorhabditis elegans transcriptome using RNA isolated from various developmental stages under various experimental conditions RW0001
SRR2015314	University of Washington Genome Sciences (UWGS-RW)	Illumina HiSeq 2000	n/a	Deep sequencing of the Caenorhabditis elegans transcriptome using RNA isolated from various developmental stages under various experimental conditions RW0001
SRR2015315	University of Washington Genome Sciences (UWGS-RW)	Illumina HiSeq 2000	n/a	Deep sequencing of the Caenorhabditis elegans transcriptome using RNA isolated from various developmental stages under various experimental conditions RW0001
SRR2015316	University of Washington Genome Sciences (UWGS-RW)	Illumina HiSeq 2000	n/a	Deep sequencing of the Caenorhabditis elegans transcriptome using RNA isolated from various developmental stages under various experimental conditions RW0001
SRR2015317	University of Washington Genome Sciences (UWGS-RW)	Illumina HiSeq 2000	n/a	Deep sequencing of the Caenorhabditis elegans transcriptome using RNA isolated from various developmental stages under various experimental conditions RW0001
SRR2015318	University of Washington Genome Sciences (UWGS-RW)	Illumina HiSeq 2000	n/a	Deep sequencing of the Caenorhabditis elegans transcriptome using RNA isolated from various developmental stages under various experimental conditions RW0001
SRR2015319	University of Washington Genome Sciences (UWGS-RW)	Illumina HiSeq 2000	n/a	Deep sequencing of the Caenorhabditis elegans transcriptome using RNA isolated from various developmental stages under various experimental conditions RW0001
SRR2015320	University of Washington Genome Sciences (UWGS-RW)	Illumina HiSeq 2000	n/a	Deep sequencing of the Caenorhabditis elegans transcriptome using RNA isolated from various developmental stages under various experimental conditions RW0001
SRR2015321	University of Washington Genome Sciences (UWGS-RW)	Illumina HiSeq 2000	n/a	Deep sequencing of the Caenorhabditis elegans transcriptome using RNA isolated from various developmental stages under various experimental conditions RW0001
SRR2015322	University of Washington Genome Sciences (UWGS-RW)	Illumina HiSeq 2000	n/a	Deep sequencing of the Caenorhabditis elegans transcriptome using RNA isolated from various developmental stages under various experimental conditions RW0001
SRR2015323	University of Washington Genome Sciences (UWGS-RW)	Illumina HiSeq 2000	n/a	Deep sequencing of the Caenorhabditis elegans transcriptome using RNA isolated from various developmental stages under various experimental conditions RW0001
SRR2015324	University of Washington Genome Sciences (UWGS-RW)	Illumina HiSeq 2000	n/a	Deep sequencing of the Caenorhabditis elegans transcriptome using RNA isolated from various developmental stages under various experimental conditions RW0001
SRR2015325	University of Washington Genome Sciences (UWGS-RW)	Illumina HiSeq 2000	n/a	Deep sequencing of the Caenorhabditis elegans transcriptome using RNA isolated from various developmental stages under various experimental conditions RW0001
SRR2015326	University of Washington Genome Sciences (UWGS-RW)	Illumina HiSeq 2000	n/a	Deep sequencing of the Caenorhabditis elegans transcriptome using RNA isolated from various developmental stages under various experimental conditions RW0001
SRR2015327	University of Washington Genome Sciences (UWGS-RW)	Illumina HiSeq 2000	n/a	Deep sequencing of the Caenorhabditis elegans transcriptome using RNA isolated from various developmental stages under various experimental conditions RW0001
SRR2015328	University of Washington Genome Sciences (UWGS-RW)	Illumina HiSeq 2000	n/a	Deep sequencing of the Caenorhabditis elegans transcriptome using RNA isolated from various developmental stages under various experimental conditions RW0001
SRR2015329	University of Washington Genome Sciences (UWGS-RW)	Illumina HiSeq 2000	n/a	Deep sequencing of the Caenorhabditis elegans transcriptome using RNA isolated from various developmental stages under various experimental conditions RW0001
SRR2015330	University of Washington Genome Sciences (UWGS-RW)	Illumina HiSeq 2000	n/a	Deep sequencing of the Caenorhabditis elegans transcriptome using RNA isolated from various developmental stages under various experimental conditions RW0001
SRR2015331	University of Washington Genome Sciences (UWGS-RW)	Illumina HiSeq 2000	n/a	Deep sequencing of the Caenorhabditis elegans transcriptome using RNA isolated from various developmental stages under various experimental conditions RW0001
SRR2015332	University of Washington Genome Sciences (UWGS-RW)	Illumina HiSeq 2000	n/a	Deep sequencing of the Caenorhabditis elegans transcriptome using RNA isolated from various developmental stages under various experimental conditions RW0001
SRR2015333	University of Washington Genome Sciences (UWGS-RW)	Illumina HiSeq 2000	n/a	Deep sequencing of the Caenorhabditis elegans transcriptome using RNA isolated from various developmental stages under various experimental conditions RW0001
SRR2015473	University of Washington Genome Sciences (UWGS-RW)	Illumina HiSeq 2000	n/a	Deep sequencing of the Caenorhabditis elegans transcriptome using RNA isolated from various developmental stages under various experimental conditions RW0001
SRR2015474	University of Washington Genome Sciences (UWGS-RW)	Illumina HiSeq 2000	n/a	Deep sequencing of the Caenorhabditis elegans transcriptome using RNA isolated from various developmental stages under various experimental conditions RW0001
SRR2015475	University of Washington Genome Sciences (UWGS-RW)	Illumina HiSeq 2000	n/a	Deep sequencing of the Caenorhabditis elegans transcriptome using RNA isolated from various developmental stages under various experimental conditions RW0001
SRR2015476	University of Washington Genome Sciences (UWGS-RW)	Illumina HiSeq 2000	n/a	Deep sequencing of the Caenorhabditis elegans transcriptome using RNA isolated from various developmental stages under various experimental conditions RW0001
SRR2015477	University of Washington Genome Sciences (UWGS-RW)	Illumina HiSeq 2000	n/a	Deep sequencing of the Caenorhabditis elegans transcriptome using RNA isolated from various developmental stages under various experimental conditions RW0001
SRR2015478	University of Washington Genome Sciences (UWGS-RW)	Illumina HiSeq 2000	n/a	Deep sequencing of the Caenorhabditis elegans transcriptome using RNA isolated from various developmental stages under various experimental conditions RW0001
SRR2015479	University of Washington Genome Sciences (UWGS-RW)	Illumina HiSeq 2000	n/a	Deep sequencing of the Caenorhabditis elegans transcriptome using RNA isolated from various developmental stages under various experimental conditions RW0001
SRR2015480	University of Washington Genome Sciences (UWGS-RW)	Illumina HiSeq 2000	n/a	Deep sequencing of the Caenorhabditis elegans transcriptome using RNA isolated from various developmental stages under various experimental conditions RW0001
SRR2015481	University of Washington Genome Sciences (UWGS-RW)	Illumina HiSeq 2000	n/a	Deep sequencing of the Caenorhabditis elegans transcriptome using RNA isolated from various developmental stages under various experimental conditions RW0001
SRR2015482	University of Washington Genome Sciences (UWGS-RW)	Illumina HiSeq 2000	n/a	Deep sequencing of the Caenorhabditis elegans transcriptome using RNA isolated from various developmental stages under various experimental conditions RW0001
SRR2015483	University of Washington Genome Sciences (UWGS-RW)	Illumina HiSeq 2000	n/a	Deep sequencing of the Caenorhabditis elegans transcriptome using RNA isolated from various developmental stages under various experimental conditions RW0001
SRR2015484	University of Washington Genome Sciences (UWGS-RW)	Illumina HiSeq 2000	n/a	Deep sequencing of the Caenorhabditis elegans transcriptome using RNA isolated from various developmental stages under various experimental conditions RW0001
SRR2015485	University of Washington Genome Sciences (UWGS-RW)	Illumina HiSeq 2000	n/a	Deep sequencing of the Caenorhabditis elegans transcriptome using RNA isolated from various developmental stages under various experimental conditions RW0001
SRR2015486	University of Washington Genome Sciences (UWGS-RW)	Illumina HiSeq 2000	n/a	Deep sequencing of the Caenorhabditis elegans transcriptome using RNA isolated from various developmental stages under various experimental conditions RW0001
SRR2015487	University of Washington Genome Sciences (UWGS-RW)	Illumina HiSeq 2000	n/a	Deep sequencing of the Caenorhabditis elegans transcriptome using RNA isolated from various developmental stages under various experimental conditions RW0001
SRR2015488	University of Washington Genome Sciences (UWGS-RW)	Illumina HiSeq 2000	n/a	Deep sequencing of the Caenorhabditis elegans transcriptome using RNA isolated from various developmental stages under various experimental conditions RW0001
SRR2015489	University of Washington Genome Sciences (UWGS-RW)	Illumina HiSeq 2000	n/a	Deep sequencing of the Caenorhabditis elegans transcriptome using RNA isolated from various developmental stages under various experimental conditions RW0001
SRR2015490	University of Washington Genome Sciences (UWGS-RW)	Illumina HiSeq 2000	n/a	Deep sequencing of the Caenorhabditis elegans transcriptome using RNA isolated from various developmental stages under various experimental conditions RW0001
SRR2015491	University of Washington Genome Sciences (UWGS-RW)	Illumina HiSeq 2000	n/a	Deep sequencing of the Caenorhabditis elegans transcriptome using RNA isolated from various developmental stages under various experimental conditions RW0001
SRR2015492	University of Washington Genome Sciences (UWGS-RW)	Illumina HiSeq 2000	n/a	Deep sequencing of the Caenorhabditis elegans transcriptome using RNA isolated from various developmental stages under various experimental conditions RW0001
SRR2039609	University of Washington Genome Sciences (UWGS-RW)	Illumina HiSeq 2000	n/a	Deep sequencing of the Caenorhabditis elegans transcriptome using RNA isolated from various developmental stages under various experimental conditions RW0001
SRR2039610	University of Washington Genome Sciences (UWGS-RW)	Illumina HiSeq 2000	n/a	Deep sequencing of the Caenorhabditis elegans transcriptome using RNA isolated from various developmental stages under various experimental conditions RW0001
SRR2039612	University of Washington Genome Sciences (UWGS-RW)	Illumina HiSeq 2000	n/a	Deep sequencing of the Caenorhabditis elegans transcriptome using RNA isolated from various developmental stages under various experimental conditions RW0001
SRR2039613	University of Washington Genome Sciences (UWGS-RW)	Illumina HiSeq 2000	n/a	Deep sequencing of the Caenorhabditis elegans transcriptome using RNA isolated from various developmental stages under various experimental conditions RW0001
SRR2039614	University of Washington Genome Sciences (UWGS-RW)	Illumina HiSeq 2000	n/a	Deep sequencing of the Caenorhabditis elegans transcriptome using RNA isolated from various developmental stages under various experimental conditions RW0001
SRR2039615	University of Washington Genome Sciences (UWGS-RW)	Illumina HiSeq 2000	n/a	Deep sequencing of the Caenorhabditis elegans transcriptome using RNA isolated from various developmental stages under various experimental conditions RW0001
SRR2039616	University of Washington Genome Sciences (UWGS-RW)	Illumina HiSeq 2000	n/a	Deep sequencing of the Caenorhabditis elegans transcriptome using RNA isolated from various developmental stages under various experimental conditions RW0001
SRR2039618	University of Washington Genome Sciences (UWGS-RW)	Illumina HiSeq 2000	n/a	Deep sequencing of the Caenorhabditis elegans transcriptome using RNA isolated from various developmental stages under various experimental conditions RW0001
SRR2039619	University of Washington Genome Sciences (UWGS-RW)	Illumina HiSeq 2000	n/a	Deep sequencing of the Caenorhabditis elegans transcriptome using RNA isolated from various developmental stages under various experimental conditions RW0001
SRR2039620	University of Washington Genome Sciences (UWGS-RW)	Illumina HiSeq 2000	n/a	Deep sequencing of the Caenorhabditis elegans transcriptome using RNA isolated from various developmental stages under various experimental conditions RW0001
SRR2043247	University of Washington Genome Sciences (UWGS-RW)	Illumina HiSeq 2000	n/a	Deep sequencing of the Caenorhabditis elegans transcriptome using RNA isolated from various developmental stages under various experimental conditions RW0001
SRR2043248	University of Washington Genome Sciences (UWGS-RW)	Illumina HiSeq 2000	n/a	Deep sequencing of the Caenorhabditis elegans transcriptome using RNA isolated from various developmental stages under various experimental conditions RW0001
SRR2043249	University of Washington Genome Sciences (UWGS-RW)	Illumina HiSeq 2000	n/a	Deep sequencing of the Caenorhabditis elegans transcriptome using RNA isolated from various developmental stages under various experimental conditions RW0001
SRR2043251	University of Washington Genome Sciences (UWGS-RW)	Illumina HiSeq 2000	n/a	Deep sequencing of the Caenorhabditis elegans transcriptome using RNA isolated from various developmental stages under various experimental conditions RW0001
SRR2043252	University of Washington Genome Sciences (UWGS-RW)	Illumina HiSeq 2000	n/a	Deep sequencing of the Caenorhabditis elegans transcriptome using RNA isolated from various developmental stages under various experimental conditions RW0001
SRR2043255	University of Washington Genome Sciences (UWGS-RW)	Illumina HiSeq 2000	n/a	Deep sequencing of the Caenorhabditis elegans transcriptome using RNA isolated from various developmental stages under various experimental conditions RW0001
SRR2043256	University of Washington Genome Sciences (UWGS-RW)	Illumina HiSeq 2000	n/a	Deep sequencing of the Caenorhabditis elegans transcriptome using RNA isolated from various developmental stages under various experimental conditions RW0001
SRR2043257	University of Washington Genome Sciences (UWGS-RW)	Illumina HiSeq 2000	n/a	Deep sequencing of the Caenorhabditis elegans transcriptome using RNA isolated from various developmental stages under various experimental conditions RW0001
SRR2043259	University of Washington Genome Sciences (UWGS-RW)	Illumina HiSeq 2000	n/a	Deep sequencing of the Caenorhabditis elegans transcriptome using RNA isolated from various developmental stages under various experimental conditions RW0001
SRR2043260	University of Washington Genome Sciences (UWGS-RW)	Illumina HiSeq 2000	n/a	Deep sequencing of the Caenorhabditis elegans transcriptome using RNA isolated from various developmental stages under various experimental conditions RW0001
SRR2043261	University of Washington Genome Sciences (UWGS-RW)	Illumina HiSeq 2000	n/a	Deep sequencing of the Caenorhabditis elegans transcriptome using RNA isolated from various developmental stages under various experimental conditions RW0001
SRR2043263	University of Washington Genome Sciences (UWGS-RW)	Illumina HiSeq 2000	n/a	Deep sequencing of the Caenorhabditis elegans transcriptome using RNA isolated from various developmental stages under various experimental conditions RW0001
SRR2043264	University of Washington Genome Sciences (UWGS-RW)	Illumina HiSeq 2000	n/a	Deep sequencing of the Caenorhabditis elegans transcriptome using RNA isolated from various developmental stages under various experimental conditions RW0001
SRR2043265	University of Washington Genome Sciences (UWGS-RW)	Illumina HiSeq 2000	n/a	Deep sequencing of the Caenorhabditis elegans transcriptome using RNA isolated from various developmental stages under various experimental conditions RW0001
SRR2043273	University of Washington Genome Sciences (UWGS-RW)	Illumina HiSeq 2000	n/a	Deep sequencing of the Caenorhabditis elegans transcriptome using RNA isolated from various developmental stages under various experimental conditions RW0001
SRR2043274	University of Washington Genome Sciences (UWGS-RW)	Illumina HiSeq 2000	n/a	Deep sequencing of the Caenorhabditis elegans transcriptome using RNA isolated from various developmental stages under various experimental conditions RW0001
SRR2043275	University of Washington Genome Sciences (UWGS-RW)	Illumina HiSeq 2000	n/a	Deep sequencing of the Caenorhabditis elegans transcriptome using RNA isolated from various developmental stages under various experimental conditions RW0001
SRR2043333	University of Washington Genome Sciences (UWGS-RW)	Illumina HiSeq 2000	n/a	Deep sequencing of the Caenorhabditis elegans transcriptome using RNA isolated from various developmental stages under various experimental conditions RW0001
SRR2043334	University of Washington Genome Sciences (UWGS-RW)	Illumina HiSeq 2000	n/a	Deep sequencing of the Caenorhabditis elegans transcriptome using RNA isolated from various developmental stages under various experimental conditions RW0001
SRR2043337	University of Washington Genome Sciences (UWGS-RW)	Illumina HiSeq 2000	5.5M spots, 1.1G bases, 628.3Mb	Deep sequencing of the Caenorhabditis elegans transcriptome using RNA isolated from various developmental stages under various experimental conditions RW0001
SRR2043339	University of Washington Genome Sciences (UWGS-RW)	Illumina HiSeq 2000	n/a	Deep sequencing of the Caenorhabditis elegans transcriptome using RNA isolated from various developmental stages under various experimental conditions RW0001
SRR2043340	University of Washington Genome Sciences (UWGS-RW)	Illumina HiSeq 2000	n/a	Deep sequencing of the Caenorhabditis elegans transcriptome using RNA isolated from various developmental stages under various experimental conditions RW0001
SRR2043341	University of Washington Genome Sciences (UWGS-RW)	Illumina HiSeq 2000	n/a	Deep sequencing of the Caenorhabditis elegans transcriptome using RNA isolated from various developmental stages under various experimental conditions RW0001
SRR2043342	University of Washington Genome Sciences (UWGS-RW)	Illumina HiSeq 2000	n/a	Deep sequencing of the Caenorhabditis elegans transcriptome using RNA isolated from various developmental stages under various experimental conditions RW0001
SRR2043343	University of Washington Genome Sciences (UWGS-RW)	Illumina HiSeq 2000	n/a	Deep sequencing of the Caenorhabditis elegans transcriptome using RNA isolated from various developmental stages under various experimental conditions RW0001
SRR2043346	University of Washington Genome Sciences (UWGS-RW)	Illumina HiSeq 2000	n/a	Deep sequencing of the Caenorhabditis elegans transcriptome using RNA isolated from various developmental stages under various experimental conditions RW0001
SRR2043347	University of Washington Genome Sciences (UWGS-RW)	Illumina HiSeq 2000	n/a	Deep sequencing of the Caenorhabditis elegans transcriptome using RNA isolated from various developmental stages under various experimental conditions RW0001
SRR2043348	University of Washington Genome Sciences (UWGS-RW)	Illumina HiSeq 2000	n/a	Deep sequencing of the Caenorhabditis elegans transcriptome using RNA isolated from various developmental stages under various experimental conditions RW0001
SRR2043368	University of Washington Genome Sciences (UWGS-RW)	Illumina HiSeq 2000	n/a	Deep sequencing of the Caenorhabditis elegans transcriptome using RNA isolated from various developmental stages under various experimental conditions RW0001
SRR2043369	University of Washington Genome Sciences (UWGS-RW)	Illumina HiSeq 2000	n/a	Deep sequencing of the Caenorhabditis elegans transcriptome using RNA isolated from various developmental stages under various experimental conditions RW0001
SRR2043471	University of Washington Genome Sciences (UWGS-RW)	Illumina HiSeq 2000	24.9M spots, 5G bases, 3.5Gb	Deep sequencing of the Caenorhabditis elegans transcriptome using RNA isolated from various developmental stages under various experimental conditions RW0001
SRR2054400	University of Washington Genome Sciences (UWGS-RW)	Illumina HiSeq 2000	n/a	Deep sequencing of the Caenorhabditis elegans transcriptome using RNA isolated from various developmental stages under various experimental conditions RW0001
SRR2054401	University of Washington Genome Sciences (UWGS-RW)	Illumina HiSeq 2000	n/a	Deep sequencing of the Caenorhabditis elegans transcriptome using RNA isolated from various developmental stages under various experimental conditions RW0001
SRR2054403	University of Washington Genome Sciences (UWGS-RW)	Illumina HiSeq 2000	31.2M spots, 6.2G bases, 4.3Gb	Deep sequencing of the Caenorhabditis elegans transcriptome using RNA isolated from various developmental stages under various experimental conditions RW0001
SRR2054404	University of Washington Genome Sciences (UWGS-RW)	Illumina HiSeq 2000	n/a	Deep sequencing of the Caenorhabditis elegans transcriptome using RNA isolated from various developmental stages under various experimental conditions RW0001
SRR2054405	University of Washington Genome Sciences (UWGS-RW)	Illumina HiSeq 2000	n/a	Deep sequencing of the Caenorhabditis elegans transcriptome using RNA isolated from various developmental stages under various experimental conditions RW0001
SRR2054407	University of Washington Genome Sciences (UWGS-RW)	Illumina HiSeq 2000	n/a	Deep sequencing of the Caenorhabditis elegans transcriptome using RNA isolated from various developmental stages under various experimental conditions RW0001
SRR2054408	University of Washington Genome Sciences (UWGS-RW)	Illumina HiSeq 2000	n/a	Deep sequencing of the Caenorhabditis elegans transcriptome using RNA isolated from various developmental stages under various experimental conditions RW0001
SRR2054409	University of Washington Genome Sciences (UWGS-RW)	Illumina HiSeq 2000	n/a	Deep sequencing of the Caenorhabditis elegans transcriptome using RNA isolated from various developmental stages under various experimental conditions RW0001
SRR2054410	University of Washington Genome Sciences (UWGS-RW)	Illumina HiSeq 2000	n/a	Deep sequencing of the Caenorhabditis elegans transcriptome using RNA isolated from various developmental stages under various experimental conditions RW0001
SRR2054411	University of Washington Genome Sciences (UWGS-RW)	Illumina HiSeq 2000	n/a	Deep sequencing of the Caenorhabditis elegans transcriptome using RNA isolated from various developmental stages under various experimental conditions RW0001
SRR2054412	University of Washington Genome Sciences (UWGS-RW)	Illumina HiSeq 2000	n/a	Deep sequencing of the Caenorhabditis elegans transcriptome using RNA isolated from various developmental stages under various experimental conditions RW0001
SRR2054415	University of Washington Genome Sciences (UWGS-RW)	Illumina HiSeq 2000	n/a	Deep sequencing of the Caenorhabditis elegans transcriptome using RNA isolated from various developmental stages under various experimental conditions RW0001
SRR2054416	University of Washington Genome Sciences (UWGS-RW)	Illumina HiSeq 2000	n/a	Deep sequencing of the Caenorhabditis elegans transcriptome using RNA isolated from various developmental stages under various experimental conditions RW0001
SRR2054417	University of Washington Genome Sciences (UWGS-RW)	Illumina HiSeq 2000	n/a	Deep sequencing of the Caenorhabditis elegans transcriptome using RNA isolated from various developmental stages under various experimental conditions RW0001
SRR2054419	University of Washington Genome Sciences (UWGS-RW)	Illumina HiSeq 2000	n/a	Deep sequencing of the Caenorhabditis elegans transcriptome using RNA isolated from various developmental stages under various experimental conditions RW0001
SRR2054420	University of Washington Genome Sciences (UWGS-RW)	Illumina HiSeq 2000	n/a	Deep sequencing of the Caenorhabditis elegans transcriptome using RNA isolated from various developmental stages under various experimental conditions RW0001
SRR2054421	University of Washington Genome Sciences (UWGS-RW)	Illumina HiSeq 2000	n/a	Deep sequencing of the Caenorhabditis elegans transcriptome using RNA isolated from various developmental stages under various experimental conditions RW0001
SRR2054422	University of Washington Genome Sciences (UWGS-RW)	Illumina HiSeq 2000	n/a	Deep sequencing of the Caenorhabditis elegans transcriptome using RNA isolated from various developmental stages under various experimental conditions RW0001
SRR2054423	University of Washington Genome Sciences (UWGS-RW)	Illumina HiSeq 2000	n/a	Deep sequencing of the Caenorhabditis elegans transcriptome using RNA isolated from various developmental stages under various experimental conditions RW0001
SRR2054424	University of Washington Genome Sciences (UWGS-RW)	Illumina HiSeq 2000	n/a	Deep sequencing of the Caenorhabditis elegans transcriptome using RNA isolated from various developmental stages under various experimental conditions RW0001
SRR2054425	University of Washington Genome Sciences (UWGS-RW)	Illumina HiSeq 2000	n/a	Deep sequencing of the Caenorhabditis elegans transcriptome using RNA isolated from various developmental stages under various experimental conditions RW0001
SRR2054427	University of Washington Genome Sciences (UWGS-RW)	Illumina HiSeq 2000	n/a	Deep sequencing of the Caenorhabditis elegans transcriptome using RNA isolated from various developmental stages under various experimental conditions RW0001
SRR2054428	University of Washington Genome Sciences (UWGS-RW)	Illumina HiSeq 2000	n/a	Deep sequencing of the Caenorhabditis elegans transcriptome using RNA isolated from various developmental stages under various experimental conditions RW0001
SRR2054429	University of Washington Genome Sciences (UWGS-RW)	Illumina HiSeq 2000	n/a	Deep sequencing of the Caenorhabditis elegans transcriptome using RNA isolated from various developmental stages under various experimental conditions RW0001
SRR2054430	University of Washington Genome Sciences (UWGS-RW)	Illumina HiSeq 2000	n/a	Deep sequencing of the Caenorhabditis elegans transcriptome using RNA isolated from various developmental stages under various experimental conditions RW0001
SRR2054431	University of Washington Genome Sciences (UWGS-RW)	Illumina HiSeq 2000	n/a	Deep sequencing of the Caenorhabditis elegans transcriptome using RNA isolated from various developmental stages under various experimental conditions RW0001
SRR2054432	University of Washington Genome Sciences (UWGS-RW)	Illumina HiSeq 2000	n/a	Deep sequencing of the Caenorhabditis elegans transcriptome using RNA isolated from various developmental stages under various experimental conditions RW0001
SRR2054433	University of Washington Genome Sciences (UWGS-RW)	Illumina HiSeq 2000	n/a	Deep sequencing of the Caenorhabditis elegans transcriptome using RNA isolated from various developmental stages under various experimental conditions RW0001
SRR2054435	University of Washington Genome Sciences (UWGS-RW)	Illumina HiSeq 2000	n/a	Deep sequencing of the Caenorhabditis elegans transcriptome using RNA isolated from various developmental stages under various experimental conditions RW0001
SRR2054436	University of Washington Genome Sciences (UWGS-RW)	Illumina HiSeq 2000	n/a	Deep sequencing of the Caenorhabditis elegans transcriptome using RNA isolated from various developmental stages under various experimental conditions RW0001
SRR2054443	University of Washington Genome Sciences (UWGS-RW)	Illumina HiSeq 2000	n/a	Deep sequencing of the Caenorhabditis elegans transcriptome using RNA isolated from various developmental stages under various experimental conditions RW0001
SRR2054444	University of Washington Genome Sciences (UWGS-RW)	Illumina HiSeq 2000	n/a	Deep sequencing of the Caenorhabditis elegans transcriptome using RNA isolated from various developmental stages under various experimental conditions RW0001
SRR2054445	University of Washington Genome Sciences (UWGS-RW)	Illumina HiSeq 2000	n/a	Deep sequencing of the Caenorhabditis elegans transcriptome using RNA isolated from various developmental stages under various experimental conditions RW0001
SRR2054446	University of Washington Genome Sciences (UWGS-RW)	Illumina HiSeq 2000	20.4M spots, 4.1G bases, 2.3Gb	Deep sequencing of the Caenorhabditis elegans transcriptome using RNA isolated from various developmental stages under various experimental conditions RW0001
SRR2054447	University of Washington Genome Sciences (UWGS-RW)	Illumina HiSeq 2000	n/a	Deep sequencing of the Caenorhabditis elegans transcriptome using RNA isolated from various developmental stages under various experimental conditions RW0001
SRR2054448	University of Washington Genome Sciences (UWGS-RW)	Illumina HiSeq 2000	n/a	Deep sequencing of the Caenorhabditis elegans transcriptome using RNA isolated from various developmental stages under various experimental conditions RW0001
SRR2054449	University of Washington Genome Sciences (UWGS-RW)	Illumina HiSeq 2000	n/a	Deep sequencing of the Caenorhabditis elegans transcriptome using RNA isolated from various developmental stages under various experimental conditions RW0001
SRR2054450	University of Washington Genome Sciences (UWGS-RW)	Illumina HiSeq 2000	n/a	Deep sequencing of the Caenorhabditis elegans transcriptome using RNA isolated from various developmental stages under various experimental conditions RW0001
SRR2054451	University of Washington Genome Sciences (UWGS-RW)	Illumina HiSeq 2000	n/a	Deep sequencing of the Caenorhabditis elegans transcriptome using RNA isolated from various developmental stages under various experimental conditions RW0001
SRR2054452	University of Washington Genome Sciences (UWGS-RW)	Illumina HiSeq 2000	n/a	Deep sequencing of the Caenorhabditis elegans transcriptome using RNA isolated from various developmental stages under various experimental conditions RW0001
SRR2054455	University of Washington Genome Sciences (UWGS-RW)	Illumina HiSeq 2000	n/a	Deep sequencing of the Caenorhabditis elegans transcriptome using RNA isolated from various developmental stages under various experimental conditions RW0001
SRR2054456	University of Washington Genome Sciences (UWGS-RW)	Illumina HiSeq 2000	n/a	Deep sequencing of the Caenorhabditis elegans transcriptome using RNA isolated from various developmental stages under various experimental conditions RW0001
SRR2054457	University of Washington Genome Sciences (UWGS-RW)	Illumina HiSeq 2000	n/a	Deep sequencing of the Caenorhabditis elegans transcriptome using RNA isolated from various developmental stages under various experimental conditions RW0001
SRR2054460	University of Washington Genome Sciences (UWGS-RW)	Illumina HiSeq 2000	n/a	Deep sequencing of the Caenorhabditis elegans transcriptome using RNA isolated from various developmental stages under various experimental conditions RW0001
SRR2054461	University of Washington Genome Sciences (UWGS-RW)	Illumina HiSeq 2000	n/a	Deep sequencing of the Caenorhabditis elegans transcriptome using RNA isolated from various developmental stages under various experimental conditions RW0001
SRR2054462	University of Washington Genome Sciences (UWGS-RW)	Illumina HiSeq 2000	n/a	Deep sequencing of the Caenorhabditis elegans transcriptome using RNA isolated from various developmental stages under various experimental conditions RW0001
SRR2054464	University of Washington Genome Sciences (UWGS-RW)	Illumina HiSeq 2000	n/a	Deep sequencing of the Caenorhabditis elegans transcriptome using RNA isolated from various developmental stages under various experimental conditions RW0001
SRR2054465	University of Washington Genome Sciences (UWGS-RW)	Illumina HiSeq 2000	n/a	Deep sequencing of the Caenorhabditis elegans transcriptome using RNA isolated from various developmental stages under various experimental conditions RW0001
SRR2054466	University of Washington Genome Sciences (UWGS-RW)	Illumina HiSeq 2000	n/a	Deep sequencing of the Caenorhabditis elegans transcriptome using RNA isolated from various developmental stages under various experimental conditions RW0001
SRR2054468	University of Washington Genome Sciences (UWGS-RW)	Illumina HiSeq 2000	n/a	Deep sequencing of the Caenorhabditis elegans transcriptome using RNA isolated from various developmental stages under various experimental conditions RW0001
SRR2054469	University of Washington Genome Sciences (UWGS-RW)	Illumina HiSeq 2000	n/a	Deep sequencing of the Caenorhabditis elegans transcriptome using RNA isolated from various developmental stages under various experimental conditions RW0001
SRR2054470	University of Washington Genome Sciences (UWGS-RW)	Illumina HiSeq 2000	n/a	Deep sequencing of the Caenorhabditis elegans transcriptome using RNA isolated from various developmental stages under various experimental conditions RW0001
SRR2054472	University of Washington Genome Sciences (UWGS-RW)	Illumina HiSeq 2000	n/a	Deep sequencing of the Caenorhabditis elegans transcriptome using RNA isolated from various developmental stages under various experimental conditions RW0001
SRR2054473	University of Washington Genome Sciences (UWGS-RW)	Illumina HiSeq 2000	n/a	Deep sequencing of the Caenorhabditis elegans transcriptome using RNA isolated from various developmental stages under various experimental conditions RW0001
SRR2054474	University of Washington Genome Sciences (UWGS-RW)	Illumina HiSeq 2000	n/a	Deep sequencing of the Caenorhabditis elegans transcriptome using RNA isolated from various developmental stages under various experimental conditions RW0001
SRR2054476	University of Washington Genome Sciences (UWGS-RW)	Illumina HiSeq 2000	n/a	Deep sequencing of the Caenorhabditis elegans transcriptome using RNA isolated from various developmental stages under various experimental conditions RW0001
SRR2054477	University of Washington Genome Sciences (UWGS-RW)	Illumina HiSeq 2000	n/a	Deep sequencing of the Caenorhabditis elegans transcriptome using RNA isolated from various developmental stages under various experimental conditions RW0001
SRR2054478	University of Washington Genome Sciences (UWGS-RW)	Illumina HiSeq 2000	n/a	Deep sequencing of the Caenorhabditis elegans transcriptome using RNA isolated from various developmental stages under various experimental conditions RW0001
SRR2054480	University of Washington Genome Sciences (UWGS-RW)	Illumina HiSeq 2000	6M spots, 1.2G bases, 726.3Mb	Deep sequencing of the Caenorhabditis elegans transcriptome using RNA isolated from various developmental stages under various experimental conditions RW0001
SRR2054482	University of Washington Genome Sciences (UWGS-RW)	Illumina HiSeq 2000	n/a	Deep sequencing of the Caenorhabditis elegans transcriptome using RNA isolated from various developmental stages under various experimental conditions RW0001
SRR2054483	University of Washington Genome Sciences (UWGS-RW)	Illumina HiSeq 2000	n/a	Deep sequencing of the Caenorhabditis elegans transcriptome using RNA isolated from various developmental stages under various experimental conditions RW0001
SRR2054484	University of Washington Genome Sciences (UWGS-RW)	Illumina HiSeq 2000	n/a	Deep sequencing of the Caenorhabditis elegans transcriptome using RNA isolated from various developmental stages under various experimental conditions RW0001
SRR2054486	University of Washington Genome Sciences (UWGS-RW)	Illumina HiSeq 2000	n/a	Deep sequencing of the Caenorhabditis elegans transcriptome using RNA isolated from various developmental stages under various experimental conditions RW0001
SRR2054487	University of Washington Genome Sciences (UWGS-RW)	Illumina HiSeq 2000	n/a	Deep sequencing of the Caenorhabditis elegans transcriptome using RNA isolated from various developmental stages under various experimental conditions RW0001
SRR2054489	University of Washington Genome Sciences (UWGS-RW)	Illumina HiSeq 2000	n/a	Deep sequencing of the Caenorhabditis elegans transcriptome using RNA isolated from various developmental stages under various experimental conditions RW0001
SRR2054490	University of Washington Genome Sciences (UWGS-RW)	Illumina HiSeq 2000	n/a	Deep sequencing of the Caenorhabditis elegans transcriptome using RNA isolated from various developmental stages under various experimental conditions RW0001
SRR2054492	University of Washington Genome Sciences (UWGS-RW)	Illumina HiSeq 2000	n/a	Deep sequencing of the Caenorhabditis elegans transcriptome using RNA isolated from various developmental stages under various experimental conditions RW0001
SRR2054493	University of Washington Genome Sciences (UWGS-RW)	Illumina HiSeq 2000	n/a	Deep sequencing of the Caenorhabditis elegans transcriptome using RNA isolated from various developmental stages under various experimental conditions RW0001
SRR2054494	University of Washington Genome Sciences (UWGS-RW)	Illumina HiSeq 2000	n/a	Deep sequencing of the Caenorhabditis elegans transcriptome using RNA isolated from various developmental stages under various experimental conditions RW0001
SRR2057681	Gene Expression Omnibus (GEO)	Illumina HiSeq 1500	22.6M spots, 2.8G bases, 1.6Gb	Tissue homogeneity requires inhibition of unequal gene silencing during development
SRR2072653	Gene Expression Omnibus (GEO)	Illumina HiSeq 2500	17.8M spots, 3.6G bases, 2.3Gb	RNA sequencing analysis of DAF-16 target gene expression when math-33 function is genetically inactivated
SRR2072654	Gene Expression Omnibus (GEO)	Illumina HiSeq 2500	21M spots, 4.2G bases, 2.7Gb	RNA sequencing analysis of DAF-16 target gene expression when math-33 function is genetically inactivated
SRR2072655	Gene Expression Omnibus (GEO)	Illumina HiSeq 2500	22.5M spots, 4.5G bases, 2.9Gb	RNA sequencing analysis of DAF-16 target gene expression when math-33 function is genetically inactivated
SRR2072656	Gene Expression Omnibus (GEO)	Illumina HiSeq 2500	19.8M spots, 4G bases, 2.5Gb	RNA sequencing analysis of DAF-16 target gene expression when math-33 function is genetically inactivated
SRR2072657	Gene Expression Omnibus (GEO)	Illumina HiSeq 2500	17.9M spots, 3.6G bases, 2.3Gb	RNA sequencing analysis of DAF-16 target gene expression when math-33 function is genetically inactivated
SRR2072658	Gene Expression Omnibus (GEO)	Illumina HiSeq 2500	22.6M spots, 4.5G bases, 2.9Gb	RNA sequencing analysis of DAF-16 target gene expression when math-33 function is genetically inactivated
SRR2072659	Gene Expression Omnibus (GEO)	Illumina HiSeq 2500	24.2M spots, 4.8G bases, 3.1Gb	RNA sequencing analysis of DAF-16 target gene expression when math-33 function is genetically inactivated
SRR2072660	Gene Expression Omnibus (GEO)	Illumina HiSeq 2500	21.6M spots, 4.3G bases, 2.7Gb	RNA sequencing analysis of DAF-16 target gene expression when math-33 function is genetically inactivated
SRR2072661	Gene Expression Omnibus (GEO)	Illumina HiSeq 2500	19.7M spots, 3.9G bases, 2.5Gb	RNA sequencing analysis of DAF-16 target gene expression when math-33 function is genetically inactivated
SRR2072662	Gene Expression Omnibus (GEO)	Illumina HiSeq 2500	19.4M spots, 3.9G bases, 2.5Gb	RNA sequencing analysis of DAF-16 target gene expression when math-33 function is genetically inactivated
SRR2086428	University of Toronto	Illumina HiSeq 2000	24.3M spots, 4.9G bases, 3.2Gb	Gene expression in four C.elegans natural isolates
SRR2086430	University of Toronto	Illumina HiSeq 2000	30.3M spots, 6.1G bases, 4Gb	Gene expression in four C.elegans natural isolates
SRR2104395	Seoul National University	Illumina HiSeq 2000	16.1M spots, 3.3G bases, 2.1Gb	Caenorhabditis elegans ALT transcriptome
SRR2104396	Seoul National University	Illumina HiSeq 2000	13.9M spots, 2.8G bases, 1.8Gb	Caenorhabditis elegans ALT transcriptome
SRR2104397	Seoul National University	Illumina HiSeq 2000	15.3M spots, 3.1G bases, 2Gb	Caenorhabditis elegans ALT transcriptome
SRR2104398	Seoul National University	Illumina HiSeq 2000	13.9M spots, 2.8G bases, 1.8Gb	Caenorhabditis elegans ALT transcriptome
SRR2142254	MPI FOR DEVELOPMENTAL BIOLOGY	Illumina HiSeq 2000	49.7M spots, 10G bases, 6.5Gb	Caenorhabditis elegans intestinal transcriptome
SRR2142255	MPI FOR DEVELOPMENTAL BIOLOGY	Illumina HiSeq 2000	38.8M spots, 7.8G bases, 4.9Gb	Caenorhabditis elegans intestinal transcriptome
SRR2185654	Gene Expression Omnibus (GEO)	Illumina HiSeq 2000	58M spots, 11.7G bases, 6.8Gb	daf-16/FoxO isoform-specific deletion mutants
SRR2185655	Gene Expression Omnibus (GEO)	Illumina HiSeq 2000	40.6M spots, 8.2G bases, 4.7Gb	daf-16/FoxO isoform-specific deletion mutants
SRR2185656	Gene Expression Omnibus (GEO)	Illumina HiSeq 2000	49.1M spots, 9.9G bases, 5.7Gb	daf-16/FoxO isoform-specific deletion mutants
SRR2185657	Gene Expression Omnibus (GEO)	Illumina HiSeq 2000	44M spots, 8.9G bases, 5.2Gb	daf-16/FoxO isoform-specific deletion mutants
SRR2185658	Gene Expression Omnibus (GEO)	Illumina HiSeq 2000	37.6M spots, 7.6G bases, 4.4Gb	daf-16/FoxO isoform-specific deletion mutants
SRR2185659	Gene Expression Omnibus (GEO)	Illumina HiSeq 2000	40.7M spots, 8.2G bases, 4.8Gb	daf-16/FoxO isoform-specific deletion mutants
SRR2185660	Gene Expression Omnibus (GEO)	Illumina HiSeq 2000	49.3M spots, 10G bases, 5.8Gb	daf-16/FoxO isoform-specific deletion mutants
SRR2185661	Gene Expression Omnibus (GEO)	Illumina HiSeq 2000	47.1M spots, 9.5G bases, 5.5Gb	daf-16/FoxO isoform-specific deletion mutants
SRR2185662	Gene Expression Omnibus (GEO)	Illumina HiSeq 2000	37.7M spots, 7.6G bases, 4.4Gb	daf-16/FoxO isoform-specific deletion mutants
SRR2185663	Gene Expression Omnibus (GEO)	Illumina HiSeq 2000	38.8M spots, 7.8G bases, 4.6Gb	daf-16/FoxO isoform-specific deletion mutants
SRR2185664	Gene Expression Omnibus (GEO)	Illumina HiSeq 2000	37.2M spots, 7.5G bases, 4.4Gb	daf-16/FoxO isoform-specific deletion mutants
SRR2185665	Gene Expression Omnibus (GEO)	Illumina HiSeq 2000	44M spots, 8.9G bases, 5.2Gb	daf-16/FoxO isoform-specific deletion mutants
SRR2185666	Gene Expression Omnibus (GEO)	Illumina HiSeq 2000	44.9M spots, 9.1G bases, 5.3Gb	daf-16/FoxO isoform-specific deletion mutants
SRR2185667	Gene Expression Omnibus (GEO)	Illumina HiSeq 2000	45.7M spots, 9.2G bases, 5.4Gb	daf-16/FoxO isoform-specific deletion mutants
SRR2185668	Gene Expression Omnibus (GEO)	Illumina HiSeq 2000	44.8M spots, 9G bases, 5.3Gb	daf-16/FoxO isoform-specific deletion mutants
SRR2185669	Gene Expression Omnibus (GEO)	Illumina HiSeq 2000	55.2M spots, 11.2G bases, 6.5Gb	daf-16/FoxO isoform-specific deletion mutants
SRR2185670	Gene Expression Omnibus (GEO)	Illumina HiSeq 2000	43.5M spots, 8.8G bases, 5.1Gb	daf-16/FoxO isoform-specific deletion mutants
SRR2185671	Gene Expression Omnibus (GEO)	Illumina HiSeq 2000	48.6M spots, 9.8G bases, 5.7Gb	daf-16/FoxO isoform-specific deletion mutants
SRR2185672	Gene Expression Omnibus (GEO)	Illumina HiSeq 2000	52.2M spots, 10.5G bases, 6.1Gb	daf-16/FoxO isoform-specific deletion mutants
SRR2185673	Gene Expression Omnibus (GEO)	Illumina HiSeq 2000	48M spots, 9.7G bases, 5.7Gb	daf-16/FoxO isoform-specific deletion mutants
SRR2185674	Gene Expression Omnibus (GEO)	Illumina HiSeq 2000	41.5M spots, 8.4G bases, 4.9Gb	daf-16/FoxO isoform-specific deletion mutants
SRR2230095	Gene Expression Omnibus (GEO)	NextSeq 500	28.7M spots, 3.9G bases, 1.8Gb	Caenorhabditis elegans ALG-1 antimorphic mutations uncover functions for Argonaute in microRNA guide strand selection and passenger strand disposal
SRR2230096	Gene Expression Omnibus (GEO)	NextSeq 500	25.8M spots, 3.5G bases, 1.6Gb	Caenorhabditis elegans ALG-1 antimorphic mutations uncover functions for Argonaute in microRNA guide strand selection and passenger strand disposal
SRR2230097	Gene Expression Omnibus (GEO)	NextSeq 500	26.3M spots, 3.6G bases, 1.7Gb	Caenorhabditis elegans ALG-1 antimorphic mutations uncover functions for Argonaute in microRNA guide strand selection and passenger strand disposal
SRR2352993	Gene Expression Omnibus (GEO)	Illumina HiSeq 2000	28.4M spots, 4.3G bases, 2.8Gb	RNA-seq from animals treated with RNAi against prp-8, prp-6, and prp-31
SRR2352994	Gene Expression Omnibus (GEO)	Illumina HiSeq 2000	34.4M spots, 5.2G bases, 3.3Gb	RNA-seq from animals treated with RNAi against prp-8, prp-6, and prp-31
SRR2352995	Gene Expression Omnibus (GEO)	Illumina HiSeq 2000	36M spots, 5.5G bases, 3.5Gb	RNA-seq from animals treated with RNAi against prp-8, prp-6, and prp-31
SRR2352996	Gene Expression Omnibus (GEO)	Illumina HiSeq 2000	47.4M spots, 7.2G bases, 4.6Gb	RNA-seq from animals treated with RNAi against prp-8, prp-6, and prp-31
SRR2352997	Gene Expression Omnibus (GEO)	Illumina HiSeq 2000	45.5M spots, 6.9G bases, 4.4Gb	RNA-seq from animals treated with RNAi against prp-8, prp-6, and prp-31
SRR2352998	Gene Expression Omnibus (GEO)	Illumina HiSeq 2000	38M spots, 5.8G bases, 3.8Gb	RNA-seq from animals treated with RNAi against prp-8, prp-6, and prp-31
SRR2352999	Gene Expression Omnibus (GEO)	Illumina HiSeq 2000	46.1M spots, 7G bases, 4.6Gb	RNA-seq from animals treated with RNAi against prp-8, prp-6, and prp-31
SRR2353000	Gene Expression Omnibus (GEO)	Illumina HiSeq 2000	38.8M spots, 5.9G bases, 3.8Gb	RNA-seq from animals treated with RNAi against prp-8, prp-6, and prp-31
SRR2353001	Gene Expression Omnibus (GEO)	Illumina HiSeq 2000	36.8M spots, 5.6G bases, 3.6Gb	RNA-seq from animals treated with RNAi against prp-8, prp-6, and prp-31
SRR2353002	Gene Expression Omnibus (GEO)	Illumina HiSeq 2000	39.7M spots, 6G bases, 3.9Gb	RNA-seq from animals treated with RNAi against prp-8, prp-6, and prp-31
SRR2353003	Gene Expression Omnibus (GEO)	Illumina HiSeq 2000	35.3M spots, 5.4G bases, 3.4Gb	RNA-seq from animals treated with RNAi against prp-8, prp-6, and prp-31
SRR2537183	Gene Expression Omnibus (GEO)	Illumina HiSeq 2500	n/a	Osmosensory neurons modulate hypertonic stress resistance in C. elegans by controlling protein damage in non-neuronal cells
SRR2537184	Gene Expression Omnibus (GEO)	Illumina HiSeq 2500	n/a	Osmosensory neurons modulate hypertonic stress resistance in C. elegans by controlling protein damage in non-neuronal cells
SRR2537185	Gene Expression Omnibus (GEO)	Illumina HiSeq 2500	n/a	Osmosensory neurons modulate hypertonic stress resistance in C. elegans by controlling protein damage in non-neuronal cells
SRR2537186	Gene Expression Omnibus (GEO)	Illumina HiSeq 2500	n/a	Osmosensory neurons modulate hypertonic stress resistance in C. elegans by controlling protein damage in non-neuronal cells
SRR2537187	Gene Expression Omnibus (GEO)	Illumina HiSeq 2500	n/a	Osmosensory neurons modulate hypertonic stress resistance in C. elegans by controlling protein damage in non-neuronal cells
SRR2537188	Gene Expression Omnibus (GEO)	Illumina HiSeq 2500	n/a	Osmosensory neurons modulate hypertonic stress resistance in C. elegans by controlling protein damage in non-neuronal cells
SRR2537189	Gene Expression Omnibus (GEO)	Illumina HiSeq 2500	n/a	Osmosensory neurons modulate hypertonic stress resistance in C. elegans by controlling protein damage in non-neuronal cells
SRR2537190	Gene Expression Omnibus (GEO)	Illumina HiSeq 2500	n/a	Osmosensory neurons modulate hypertonic stress resistance in C. elegans by controlling protein damage in non-neuronal cells
SRR2537191	Gene Expression Omnibus (GEO)	Illumina HiSeq 2500	n/a	Osmosensory neurons modulate hypertonic stress resistance in C. elegans by controlling protein damage in non-neuronal cells
SRR2537192	Gene Expression Omnibus (GEO)	Illumina HiSeq 2500	n/a	Osmosensory neurons modulate hypertonic stress resistance in C. elegans by controlling protein damage in non-neuronal cells
SRR2537193	Gene Expression Omnibus (GEO)	Illumina HiSeq 2500	n/a	Osmosensory neurons modulate hypertonic stress resistance in C. elegans by controlling protein damage in non-neuronal cells
SRR2537194	Gene Expression Omnibus (GEO)	Illumina HiSeq 2500	n/a	Osmosensory neurons modulate hypertonic stress resistance in C. elegans by controlling protein damage in non-neuronal cells
SRR2537195	Gene Expression Omnibus (GEO)	Illumina HiSeq 2500	n/a	Osmosensory neurons modulate hypertonic stress resistance in C. elegans by controlling protein damage in non-neuronal cells
SRR2537196	Gene Expression Omnibus (GEO)	Illumina HiSeq 2500	n/a	Osmosensory neurons modulate hypertonic stress resistance in C. elegans by controlling protein damage in non-neuronal cells
SRR2537197	Gene Expression Omnibus (GEO)	Illumina HiSeq 2500	n/a	Osmosensory neurons modulate hypertonic stress resistance in C. elegans by controlling protein damage in non-neuronal cells
SRR2537198	Gene Expression Omnibus (GEO)	Illumina HiSeq 2500	n/a	Osmosensory neurons modulate hypertonic stress resistance in C. elegans by controlling protein damage in non-neuronal cells
SRR2537199	Gene Expression Omnibus (GEO)	Illumina HiSeq 2500	n/a	Osmosensory neurons modulate hypertonic stress resistance in C. elegans by controlling protein damage in non-neuronal cells
SRR2537200	Gene Expression Omnibus (GEO)	Illumina HiSeq 2500	n/a	Osmosensory neurons modulate hypertonic stress resistance in C. elegans by controlling protein damage in non-neuronal cells
SRR2537201	Gene Expression Omnibus (GEO)	Illumina HiSeq 2500	n/a	Osmosensory neurons modulate hypertonic stress resistance in C. elegans by controlling protein damage in non-neuronal cells
SRR2537202	Gene Expression Omnibus (GEO)	Illumina HiSeq 2500	n/a	Osmosensory neurons modulate hypertonic stress resistance in C. elegans by controlling protein damage in non-neuronal cells
SRR2537203	Gene Expression Omnibus (GEO)	Illumina HiSeq 2500	n/a	Osmosensory neurons modulate hypertonic stress resistance in C. elegans by controlling protein damage in non-neuronal cells
SRR2537204	Gene Expression Omnibus (GEO)	Illumina HiSeq 2500	n/a	Osmosensory neurons modulate hypertonic stress resistance in C. elegans by controlling protein damage in non-neuronal cells
SRR2537205	Gene Expression Omnibus (GEO)	Illumina HiSeq 2500	n/a	Osmosensory neurons modulate hypertonic stress resistance in C. elegans by controlling protein damage in non-neuronal cells
SRR2537206	Gene Expression Omnibus (GEO)	Illumina HiSeq 2500	n/a	Osmosensory neurons modulate hypertonic stress resistance in C. elegans by controlling protein damage in non-neuronal cells
SRR2566273	Stanford Univerisy	Illumina MiSeq	10.3M spots, 1.5G bases, 497.3Mb	Translation Readthrough Mitigation
SRR29428	Gene Expression Omnibus (GEO)	Illumina Genome Analyzer II	3M spots, 106.8M bases, 65.6Mb	Illumina sequencing of small RNAs from C. elegans embryos
SRR2954656	Monash University	Illumina HiSeq 2500	12.5M spots, 2.5G bases, 1.6Gb	Caenorhabditis elegans strain:Bristol Transcriptome or Gene expression
SRR2954657	Monash University	Illumina HiSeq 2500	12.5M spots, 2.5G bases, 1.6Gb	Caenorhabditis elegans strain:Bristol Transcriptome or Gene expression
SRR2954658	Monash University	Illumina HiSeq 2500	12.5M spots, 2.5G bases, 1.6Gb	Caenorhabditis elegans strain:Bristol Transcriptome or Gene expression
SRR2954659	Monash University	Illumina HiSeq 2500	12.4M spots, 2.5G bases, 1.6Gb	Caenorhabditis elegans strain:Bristol Transcriptome or Gene expression
SRR2969230	Princeton University	Illumina HiSeq 2000	35.8M spots, 6.8G bases, 3.7Gb	Caenorhabditis elegans Transcriptome or Gene expression
SRR2969231	Princeton University	Illumina HiSeq 2000	12.4M spots, 2.4G bases, 1.3Gb	Caenorhabditis elegans Transcriptome or Gene expression
SRR2969232	Princeton University	Illumina HiSeq 2000	42.5M spots, 7.7G bases, 4.5Gb	Caenorhabditis elegans Transcriptome or Gene expression
SRR2969233	Princeton University	Illumina HiSeq 2000	n/a	Caenorhabditis elegans Transcriptome or Gene expression
SRR2969234	Princeton University	Illumina HiSeq 2000	n/a	Caenorhabditis elegans Transcriptome or Gene expression
SRR2969235	Princeton University	Illumina HiSeq 2000	n/a	Caenorhabditis elegans Transcriptome or Gene expression
SRR2969236	Princeton University	Illumina HiSeq 2000	32.3M spots, 6.2G bases, 3.4Gb	Caenorhabditis elegans Transcriptome or Gene expression
SRR2969237	Princeton University	Illumina HiSeq 2000	33.1M spots, 4.7G bases, 3Gb	Caenorhabditis elegans Transcriptome or Gene expression
SRR2969238	Princeton University	Illumina HiSeq 2000	31.3M spots, 4.4G bases, 2.8Gb	Caenorhabditis elegans Transcriptome or Gene expression
SRR2969239	Princeton University	Illumina HiSeq 2000	93.9M spots, 11.5G bases, 7.4Gb	Caenorhabditis elegans Transcriptome or Gene expression
SRR2969240	Princeton University	Illumina HiSeq 2000	35.3M spots, 3.6G bases, 2.2Gb	Caenorhabditis elegans Transcriptome or Gene expression
SRR2969241	Princeton University	Illumina HiSeq 2000	40.3M spots, 4.1G bases, 2.4Gb	Caenorhabditis elegans Transcriptome or Gene expression
SRR2969242	Princeton University	Illumina HiSeq 2000	71.9M spots, 10.2G bases, 5.4Gb	Caenorhabditis elegans Transcriptome or Gene expression
SRR2969243	Princeton University	Illumina HiSeq 2000	64.9M spots, 8.1G bases, 5.2Gb	Caenorhabditis elegans Transcriptome or Gene expression
SRR2969244	Princeton University	Illumina HiSeq 2000	36.3M spots, 3.7G bases, 2.1Gb	Caenorhabditis elegans Transcriptome or Gene expression
SRR2969245	Princeton University	Illumina HiSeq 2000	32.8M spots, 3.3G bases, 1.9Gb	Caenorhabditis elegans Transcriptome or Gene expression
SRR2969246	Princeton University	Illumina HiSeq 2000	78.5M spots, 11.1G bases, 5.8Gb	Caenorhabditis elegans Transcriptome or Gene expression
SRR2973733	NCBI (GEO)	Illumina HiSeq 2000	30.9M spots, 4.7G bases, 3Gb	RNA-seq from L4 animals treated with RNAi against gfp (control), ham-3, and swsn-2.2
SRR2973734	NCBI (GEO)	Illumina HiSeq 2000	48.4M spots, 7.4G bases, 4.6Gb	RNA-seq from L4 animals treated with RNAi against gfp (control), ham-3, and swsn-2.2
SRR2973735	NCBI (GEO)	Illumina HiSeq 2000	48.7M spots, 7.4G bases, 4.7Gb	RNA-seq from L4 animals treated with RNAi against gfp (control), ham-3, and swsn-2.2
SRR2979473	Princeton University	Illumina HiSeq 2000	n/a	Caenorhabditis elegans Transcriptome or Gene expression
SRR2979475	Princeton University	Illumina HiSeq 2000	n/a	Caenorhabditis elegans Transcriptome or Gene expression
SRR2979476	Princeton University	Illumina HiSeq 2000	n/a	Caenorhabditis elegans Transcriptome or Gene expression
SRR3066481	NCBI (GEO)	Illumina HiSeq 1500	25.9M spots, 3.3G bases, 1.8Gb	Ingested double-stranded RNA engages multiple silencing mechanisms in C. elegans
SRR3066482	NCBI (GEO)	Illumina HiSeq 1500	21.6M spots, 2.7G bases, 1.5Gb	Ingested double-stranded RNA engages multiple silencing mechanisms in C. elegans
SRR3090703	University of Massachusetts Medical School	Illumina Genome Analyzer II	13.6M spots, 1.4G bases, 720.8Mb	Caenorhabditis elegans Raw sequence reads
SRR3090706	University of Massachusetts Medical School	Illumina Genome Analyzer II	10.1M spots, 1G bases, 516Mb	Caenorhabditis elegans Raw sequence reads
SRR3090708	University of Massachusetts Medical School	Illumina Genome Analyzer II	13.1M spots, 1.3G bases, 693.8Mb	Caenorhabditis elegans Raw sequence reads
SRR3090722	University of Massachusetts Medical School	Illumina Genome Analyzer II	9.9M spots, 986.6M bases, 525.4Mb	Caenorhabditis elegans Raw sequence reads
SRR3090724	University of Massachusetts Medical School	Illumina Genome Analyzer II	14.4M spots, 1.4G bases, 764.5Mb	Caenorhabditis elegans Raw sequence reads
SRR3090725	University of Massachusetts Medical School	Illumina Genome Analyzer II	9.6M spots, 962.3M bases, 507.7Mb	Caenorhabditis elegans Raw sequence reads
SRR3098492	NCBI (GEO)	Illumina HiSeq 2000	48.2M spots, 4.8G bases, 3Gb	Nuclear Envelope Retention of LINC Complexes Is Promoted by SUN-1 Oligomerization in the Caenorhabditis elegans Germ Line
SRR3098493	NCBI (GEO)	Illumina HiSeq 2000	32.5M spots, 3.3G bases, 2.1Gb	Nuclear Envelope Retention of LINC Complexes Is Promoted by SUN-1 Oligomerization in the Caenorhabditis elegans Germ Line
SRR3098494	NCBI (GEO)	Illumina HiSeq 2000	51.6M spots, 5.2G bases, 3.3Gb	Nuclear Envelope Retention of LINC Complexes Is Promoted by SUN-1 Oligomerization in the Caenorhabditis elegans Germ Line
SRR3098495	NCBI (GEO)	Illumina HiSeq 2000	43.9M spots, 4.4G bases, 2.9Gb	Nuclear Envelope Retention of LINC Complexes Is Promoted by SUN-1 Oligomerization in the Caenorhabditis elegans Germ Line
SRR3098496	NCBI (GEO)	Illumina HiSeq 2000	37.2M spots, 3.7G bases, 2.4Gb	Nuclear Envelope Retention of LINC Complexes Is Promoted by SUN-1 Oligomerization in the Caenorhabditis elegans Germ Line
SRR3160425	University of Massachusetts Medical School	Illumina HiSeq 2500	20.7M spots, 2.1G bases, 1.1Gb	Caenorhabditis elegans strain:Bristol N2 Raw sequence reads
SRR3160426	University of Massachusetts Medical School	Illumina HiSeq 2500	19M spots, 1.9G bases, 1Gb	Caenorhabditis elegans strain:Bristol N2 Raw sequence reads
SRR3160427	University of Massachusetts Medical School	Illumina HiSeq 2500	18.3M spots, 1.8G bases, 994.1Mb	Caenorhabditis elegans strain:Bristol N2 Raw sequence reads
SRR3160428	University of Massachusetts Medical School	Illumina HiSeq 2500	21.2M spots, 2.1G bases, 1.1Gb	Caenorhabditis elegans strain:Bristol N2 Raw sequence reads
SRR3160429	University of Massachusetts Medical School	Illumina HiSeq 2500	20.7M spots, 2.1G bases, 1.1Gb	Caenorhabditis elegans strain:Bristol N2 Raw sequence reads
SRR3160430	University of Massachusetts Medical School	Illumina HiSeq 2500	20.5M spots, 2.1G bases, 1.1Gb	Caenorhabditis elegans strain:Bristol N2 Raw sequence reads
SRR3160431	University of Massachusetts Medical School	Illumina HiSeq 2500	20M spots, 2G bases, 1.1Gb	Caenorhabditis elegans strain:Bristol N2 Raw sequence reads
SRR3160432	University of Massachusetts Medical School	Illumina HiSeq 2500	18.5M spots, 1.9G bases, 1,010.8Mb	Caenorhabditis elegans strain:Bristol N2 Raw sequence reads
SRR3160434	University of Massachusetts Medical School	Illumina HiSeq 2500	19.7M spots, 2G bases, 1Gb	Caenorhabditis elegans strain:Bristol N2 Raw sequence reads
SRR3160435	University of Massachusetts Medical School	Illumina HiSeq 2500	18.5M spots, 1.9G bases, 1,014.9Mb	Caenorhabditis elegans strain:Bristol N2 Raw sequence reads
SRR3160436	University of Massachusetts Medical School	Illumina HiSeq 2500	17.7M spots, 1.8G bases, 963.8Mb	Caenorhabditis elegans strain:Bristol N2 Raw sequence reads
SRR3160437	University of Massachusetts Medical School	Illumina HiSeq 2500	20.2M spots, 2G bases, 1.1Gb	Caenorhabditis elegans strain:Bristol N2 Raw sequence reads
SRR3173720	NCBI (GEO)	Illumina HiSeq 2000	n/a	TRX-1 Regulates SKN-1 Nuclear Localization Cell Non-Autonomously in Caenorhabditis elegans
SRR3173722	NCBI (GEO)	Illumina HiSeq 2000	n/a	TRX-1 Regulates SKN-1 Nuclear Localization Cell Non-Autonomously in Caenorhabditis elegans
SRR3173723	NCBI (GEO)	Illumina HiSeq 2000	n/a	TRX-1 Regulates SKN-1 Nuclear Localization Cell Non-Autonomously in Caenorhabditis elegans
SRR3173724	NCBI (GEO)	Illumina HiSeq 2000	n/a	TRX-1 Regulates SKN-1 Nuclear Localization Cell Non-Autonomously in Caenorhabditis elegans
SRR3173725	NCBI (GEO)	Illumina HiSeq 2000	n/a	TRX-1 Regulates SKN-1 Nuclear Localization Cell Non-Autonomously in Caenorhabditis elegans
SRR3173726	NCBI (GEO)	Illumina HiSeq 2000	n/a	TRX-1 Regulates SKN-1 Nuclear Localization Cell Non-Autonomously in Caenorhabditis elegans
SRR3173727	NCBI (GEO)	Illumina HiSeq 2000	n/a	TRX-1 Regulates SKN-1 Nuclear Localization Cell Non-Autonomously in Caenorhabditis elegans
SRR3173728	NCBI (GEO)	Illumina HiSeq 2000	n/a	TRX-1 Regulates SKN-1 Nuclear Localization Cell Non-Autonomously in Caenorhabditis elegans
SRR3173729	NCBI (GEO)	Illumina HiSeq 2000	n/a	TRX-1 Regulates SKN-1 Nuclear Localization Cell Non-Autonomously in Caenorhabditis elegans
SRR3173730	NCBI (GEO)	Illumina HiSeq 2000	n/a	TRX-1 Regulates SKN-1 Nuclear Localization Cell Non-Autonomously in Caenorhabditis elegans
SRR3173731	NCBI (GEO)	Illumina HiSeq 2000	n/a	TRX-1 Regulates SKN-1 Nuclear Localization Cell Non-Autonomously in Caenorhabditis elegans
SRR3173732	NCBI (GEO)	Illumina HiSeq 2000	n/a	TRX-1 Regulates SKN-1 Nuclear Localization Cell Non-Autonomously in Caenorhabditis elegans
SRR3173733	NCBI (GEO)	Illumina HiSeq 2000	n/a	TRX-1 Regulates SKN-1 Nuclear Localization Cell Non-Autonomously in Caenorhabditis elegans
SRR3173734	NCBI (GEO)	Illumina HiSeq 2000	n/a	TRX-1 Regulates SKN-1 Nuclear Localization Cell Non-Autonomously in Caenorhabditis elegans
SRR3173738	NCBI (GEO)	Illumina HiSeq 2000	n/a	TRX-1 Regulates SKN-1 Nuclear Localization Cell Non-Autonomously in Caenorhabditis elegans
SRR3173739	NCBI (GEO)	Illumina HiSeq 2000	n/a	TRX-1 Regulates SKN-1 Nuclear Localization Cell Non-Autonomously in Caenorhabditis elegans
SRR3173740	NCBI (GEO)	Illumina HiSeq 2000	n/a	TRX-1 Regulates SKN-1 Nuclear Localization Cell Non-Autonomously in Caenorhabditis elegans
SRR3173741	NCBI (GEO)	Illumina HiSeq 2000	n/a	TRX-1 Regulates SKN-1 Nuclear Localization Cell Non-Autonomously in Caenorhabditis elegans
SRR3173742	NCBI (GEO)	Illumina HiSeq 2000	n/a	TRX-1 Regulates SKN-1 Nuclear Localization Cell Non-Autonomously in Caenorhabditis elegans
SRR3173743	NCBI (GEO)	Illumina HiSeq 2000	n/a	TRX-1 Regulates SKN-1 Nuclear Localization Cell Non-Autonomously in Caenorhabditis elegans
SRR3173744	NCBI (GEO)	Illumina HiSeq 2000	n/a	TRX-1 Regulates SKN-1 Nuclear Localization Cell Non-Autonomously in Caenorhabditis elegans
SRR3173745	NCBI (GEO)	Illumina HiSeq 2000	n/a	TRX-1 Regulates SKN-1 Nuclear Localization Cell Non-Autonomously in Caenorhabditis elegans
SRR3173746	NCBI (GEO)	Illumina HiSeq 2000	n/a	TRX-1 Regulates SKN-1 Nuclear Localization Cell Non-Autonomously in Caenorhabditis elegans
SRR3173748	NCBI (GEO)	Illumina HiSeq 2000	n/a	TRX-1 Regulates SKN-1 Nuclear Localization Cell Non-Autonomously in Caenorhabditis elegans
SRR3173749	NCBI (GEO)	Illumina HiSeq 2000	n/a	TRX-1 Regulates SKN-1 Nuclear Localization Cell Non-Autonomously in Caenorhabditis elegans
SRR3173750	NCBI (GEO)	Illumina HiSeq 2000	n/a	TRX-1 Regulates SKN-1 Nuclear Localization Cell Non-Autonomously in Caenorhabditis elegans
SRR3173751	NCBI (GEO)	Illumina HiSeq 2000	n/a	TRX-1 Regulates SKN-1 Nuclear Localization Cell Non-Autonomously in Caenorhabditis elegans
SRR3173752	NCBI (GEO)	Illumina HiSeq 2000	n/a	TRX-1 Regulates SKN-1 Nuclear Localization Cell Non-Autonomously in Caenorhabditis elegans
SRR3173753	NCBI (GEO)	Illumina HiSeq 2000	n/a	TRX-1 Regulates SKN-1 Nuclear Localization Cell Non-Autonomously in Caenorhabditis elegans
SRR3173754	NCBI (GEO)	Illumina HiSeq 2000	n/a	TRX-1 Regulates SKN-1 Nuclear Localization Cell Non-Autonomously in Caenorhabditis elegans
SRR3173755	NCBI (GEO)	Illumina HiSeq 2000	n/a	TRX-1 Regulates SKN-1 Nuclear Localization Cell Non-Autonomously in Caenorhabditis elegans
SRR3173756	NCBI (GEO)	Illumina HiSeq 2000	n/a	TRX-1 Regulates SKN-1 Nuclear Localization Cell Non-Autonomously in Caenorhabditis elegans
SRR3173757	NCBI (GEO)	Illumina HiSeq 2000	n/a	TRX-1 Regulates SKN-1 Nuclear Localization Cell Non-Autonomously in Caenorhabditis elegans
SRR3173758	NCBI (GEO)	Illumina HiSeq 2000	n/a	TRX-1 Regulates SKN-1 Nuclear Localization Cell Non-Autonomously in Caenorhabditis elegans
SRR3320128	NCBI (GEO)	Illumina HiSeq 2000	58.2M spots, 9.3G bases, 5.1Gb	Localization of RNAPII and 3‚Äô end formation factor CstF subunits on C. elegans genes and operons [RNA-seq]
SRR3320129	NCBI (GEO)	Illumina HiSeq 2000	28.9M spots, 4.6G bases, 2.5Gb	Localization of RNAPII and 3‚Äô end formation factor CstF subunits on C. elegans genes and operons [RNA-seq]
SRR3320130	NCBI (GEO)	Illumina HiSeq 2000	102.5M spots, 20.5G bases, 8Gb	Localization of RNAPII and 3‚Äô end formation factor CstF subunits on C. elegans genes and operons [RNA-seq]
SRR3320131	NCBI (GEO)	Illumina HiSeq 2000	88.2M spots, 17.6G bases, 6.8Gb	Localization of RNAPII and 3‚Äô end formation factor CstF subunits on C. elegans genes and operons [RNA-seq]
SRR3342180	NCBI (GEO)	Illumina HiSeq 2500	n/a	XRN2 Autoregulation and Control of Polycistronic Gene Expression in Caenorhabditis elegans
SRR3342181	NCBI (GEO)	Illumina HiSeq 2500	n/a	XRN2 Autoregulation and Control of Polycistronic Gene Expression in Caenorhabditis elegans
SRR3342182	NCBI (GEO)	Illumina HiSeq 2500	n/a	XRN2 Autoregulation and Control of Polycistronic Gene Expression in Caenorhabditis elegans
SRR3342183	NCBI (GEO)	Illumina HiSeq 2500	n/a	XRN2 Autoregulation and Control of Polycistronic Gene Expression in Caenorhabditis elegans
SRR3547967	University of Missouri	Illumina MiSeq	8.6M spots, 858.1M bases, 523.9Mb	Caenorhabditis elegans Transcriptome or Gene expression
SRR3547968	University of Missouri	Illumina MiSeq	7.5M spots, 745.3M bases, 451.6Mb	Caenorhabditis elegans Transcriptome or Gene expression
SRR3547969	University of Missouri	Illumina MiSeq	8.4M spots, 844M bases, 439.5Mb	Caenorhabditis elegans Transcriptome or Gene expression
SRR3547970	University of Missouri	Illumina MiSeq	6.1M spots, 607.7M bases, 379.6Mb	Caenorhabditis elegans Transcriptome or Gene expression
SRR3547971	University of Missouri	Illumina MiSeq	9.3M spots, 929.3M bases, 575.9Mb	Caenorhabditis elegans Transcriptome or Gene expression
SRR3547972	University of Missouri	Illumina MiSeq	7.5M spots, 745.8M bases, 457Mb	Caenorhabditis elegans Transcriptome or Gene expression
SRR3547973	University of Missouri	Illumina MiSeq	7.4M spots, 739.6M bases, 458Mb	Caenorhabditis elegans Transcriptome or Gene expression
SRR3547974	University of Missouri	Illumina MiSeq	7.1M spots, 706.2M bases, 436.2Mb	Caenorhabditis elegans Transcriptome or Gene expression
SRR3547975	University of Missouri	Illumina MiSeq	8.1M spots, 807.1M bases, 492.8Mb	Caenorhabditis elegans Transcriptome or Gene expression
SRR3547976	University of Missouri	Illumina MiSeq	8.1M spots, 809.2M bases, 497.1Mb	Caenorhabditis elegans Transcriptome or Gene expression
SRR3547977	University of Missouri	Illumina MiSeq	6M spots, 599.9M bases, 367.6Mb	Caenorhabditis elegans Transcriptome or Gene expression
SRR3547978	University of Missouri	Illumina MiSeq	7.8M spots, 777.4M bases, 479.4Mb	Caenorhabditis elegans Transcriptome or Gene expression
SRR3547979	University of Missouri	Illumina MiSeq	8.1M spots, 805.4M bases, 499.3Mb	Caenorhabditis elegans Transcriptome or Gene expression
SRR3547980	University of Missouri	Illumina MiSeq	8M spots, 797.8M bases, 487.7Mb	Caenorhabditis elegans Transcriptome or Gene expression
SRR3560827	NCBI (GEO)	NextSeq 500	31.3M spots, 4.7G bases, 2.1Gb	Germline- and soma-specific heritable epigenetic silencing at an endogenous locus (RNA-Seq)
SRR3560828	NCBI (GEO)	NextSeq 500	26.3M spots, 3.9G bases, 1.8Gb	Germline- and soma-specific heritable epigenetic silencing at an endogenous locus (RNA-Seq)
SRR3560829	NCBI (GEO)	NextSeq 500	51.7M spots, 7.7G bases, 3.5Gb	Germline- and soma-specific heritable epigenetic silencing at an endogenous locus (RNA-Seq)
SRR3560830	NCBI (GEO)	NextSeq 500	53.1M spots, 7.9G bases, 3.6Gb	Germline- and soma-specific heritable epigenetic silencing at an endogenous locus (RNA-Seq)
SRR3560831	NCBI (GEO)	NextSeq 500	31.5M spots, 3.5G bases, 1.6Gb	Germline- and soma-specific heritable epigenetic silencing at an endogenous locus (RNA-Seq)
SRR3560832	NCBI (GEO)	NextSeq 500	29.5M spots, 3.3G bases, 1.5Gb	Germline- and soma-specific heritable epigenetic silencing at an endogenous locus (RNA-Seq)
SRR3560833	NCBI (GEO)	NextSeq 500	32.5M spots, 3.7G bases, 1.7Gb	Germline- and soma-specific heritable epigenetic silencing at an endogenous locus (RNA-Seq)
SRR3560834	NCBI (GEO)	NextSeq 500	26.7M spots, 3.1G bases, 1.4Gb	Germline- and soma-specific heritable epigenetic silencing at an endogenous locus (RNA-Seq)
SRR363980	Gene Expression Omnibus (GEO)	Illumina HiSeq 2000	86.8M spots, 17.4G bases, 10.3Gb	In vivo and transcriptome-wide identification of RNA-binding protein target sites [RNA-Seq]
SRR363981	Gene Expression Omnibus (GEO)	Illumina HiSeq 2000	76.1M spots, 15.2G bases, 9Gb	In vivo and transcriptome-wide identification of RNA-binding protein target sites [RNA-Seq]
SRR3657224	NCBI (GEO)	Illumina HiSeq 2500	12.1M spots, 1.2G bases, 877.2Mb	Developmental transcriptomes of the two sexes in Caenorhabditis elegans during sexual maturation
SRR3657225	NCBI (GEO)	Illumina HiSeq 2500	9.6M spots, 966M bases, 696.4Mb	Developmental transcriptomes of the two sexes in Caenorhabditis elegans during sexual maturation
SRR3657226	NCBI (GEO)	Illumina HiSeq 2500	10.5M spots, 1.1G bases, 769.2Mb	Developmental transcriptomes of the two sexes in Caenorhabditis elegans during sexual maturation
SRR3657227	NCBI (GEO)	Illumina HiSeq 2500	22.2M spots, 2.2G bases, 1.6Gb	Developmental transcriptomes of the two sexes in Caenorhabditis elegans during sexual maturation
SRR3657228	NCBI (GEO)	Illumina HiSeq 2500	23.6M spots, 2.4G bases, 1.7Gb	Developmental transcriptomes of the two sexes in Caenorhabditis elegans during sexual maturation
SRR3657229	NCBI (GEO)	Illumina HiSeq 2500	13.1M spots, 1.3G bases, 958.3Mb	Developmental transcriptomes of the two sexes in Caenorhabditis elegans during sexual maturation
SRR3657230	NCBI (GEO)	Illumina HiSeq 2500	34.3M spots, 3.5G bases, 2.3Gb	Developmental transcriptomes of the two sexes in Caenorhabditis elegans during sexual maturation
SRR3657231	NCBI (GEO)	Illumina HiSeq 2500	21.7M spots, 2.2G bases, 1.5Gb	Developmental transcriptomes of the two sexes in Caenorhabditis elegans during sexual maturation
SRR3657232	NCBI (GEO)	Illumina HiSeq 2500	15M spots, 1.5G bases, 1Gb	Developmental transcriptomes of the two sexes in Caenorhabditis elegans during sexual maturation
SRR3657233	NCBI (GEO)	Illumina HiSeq 2500	20.5M spots, 2.1G bases, 1.4Gb	Developmental transcriptomes of the two sexes in Caenorhabditis elegans during sexual maturation
SRR3657711	NCBI (GEO)	Illumina HiSeq 2000	29.7M spots, 3G bases, 1.2Gb	Expression profiles in Caenorhabditis elegans mutants lacking an intestinally expressed microRNA mir-60 that promote adaptive response against chronic oxidative stress
SRR3657712	NCBI (GEO)	Illumina HiSeq 2000	32M spots, 3.2G bases, 1.3Gb	Expression profiles in Caenorhabditis elegans mutants lacking an intestinally expressed microRNA mir-60 that promote adaptive response against chronic oxidative stress
SRR3657713	NCBI (GEO)	Illumina HiSeq 2000	34.8M spots, 3.5G bases, 1.4Gb	Expression profiles in Caenorhabditis elegans mutants lacking an intestinally expressed microRNA mir-60 that promote adaptive response against chronic oxidative stress
SRR3657714	NCBI (GEO)	Illumina HiSeq 2000	37.4M spots, 3.7G bases, 1.5Gb	Expression profiles in Caenorhabditis elegans mutants lacking an intestinally expressed microRNA mir-60 that promote adaptive response against chronic oxidative stress
SRR3657715	NCBI (GEO)	Illumina HiSeq 2000	34.7M spots, 3.5G bases, 1.4Gb	Expression profiles in Caenorhabditis elegans mutants lacking an intestinally expressed microRNA mir-60 that promote adaptive response against chronic oxidative stress
SRR3657716	NCBI (GEO)	Illumina HiSeq 2000	33.7M spots, 3.4G bases, 1.3Gb	Expression profiles in Caenorhabditis elegans mutants lacking an intestinally expressed microRNA mir-60 that promote adaptive response against chronic oxidative stress
SRR3657717	NCBI (GEO)	Illumina HiSeq 2000	33.7M spots, 3.4G bases, 1.3Gb	Expression profiles in Caenorhabditis elegans mutants lacking an intestinally expressed microRNA mir-60 that promote adaptive response against chronic oxidative stress
SRR3657718	NCBI (GEO)	Illumina HiSeq 2000	30M spots, 3G bases, 1.2Gb	Expression profiles in Caenorhabditis elegans mutants lacking an intestinally expressed microRNA mir-60 that promote adaptive response against chronic oxidative stress
SRR3657719	NCBI (GEO)	Illumina HiSeq 2000	32.4M spots, 3.2G bases, 1.3Gb	Expression profiles in Caenorhabditis elegans mutants lacking an intestinally expressed microRNA mir-60 that promote adaptive response against chronic oxidative stress
SRR3657720	NCBI (GEO)	Illumina HiSeq 2000	32.2M spots, 3.2G bases, 1.3Gb	Expression profiles in Caenorhabditis elegans mutants lacking an intestinally expressed microRNA mir-60 that promote adaptive response against chronic oxidative stress
SRR3657721	NCBI (GEO)	Illumina HiSeq 2000	38.1M spots, 3.8G bases, 1.5Gb	Expression profiles in Caenorhabditis elegans mutants lacking an intestinally expressed microRNA mir-60 that promote adaptive response against chronic oxidative stress
SRR3657722	NCBI (GEO)	Illumina HiSeq 2000	35.2M spots, 3.5G bases, 1.4Gb	Expression profiles in Caenorhabditis elegans mutants lacking an intestinally expressed microRNA mir-60 that promote adaptive response against chronic oxidative stress
SRR3657723	NCBI (GEO)	Illumina HiSeq 2000	34.2M spots, 3.4G bases, 1.4Gb	Expression profiles in Caenorhabditis elegans mutants lacking an intestinally expressed microRNA mir-60 that promote adaptive response against chronic oxidative stress
SRR3657724	NCBI (GEO)	Illumina HiSeq 2000	34.2M spots, 3.4G bases, 1.4Gb	Expression profiles in Caenorhabditis elegans mutants lacking an intestinally expressed microRNA mir-60 that promote adaptive response against chronic oxidative stress
SRR3703183	NCBI (GEO)	Illumina HiSeq 2000	35.2M spots, 3.5G bases, 1.6Gb	Transgenerational transmission of environmental information in C. elegans
SRR3703184	NCBI (GEO)	Illumina HiSeq 2000	34.3M spots, 3.4G bases, 1.6Gb	Transgenerational transmission of environmental information in C. elegans
SRR3703185	NCBI (GEO)	Illumina HiSeq 2000	36.1M spots, 3.6G bases, 1.7Gb	Transgenerational transmission of environmental information in C. elegans
SRR3703186	NCBI (GEO)	Illumina HiSeq 2000	32.3M spots, 3.2G bases, 1.5Gb	Transgenerational transmission of environmental information in C. elegans
SRR3703187	NCBI (GEO)	Illumina HiSeq 2000	32.9M spots, 3.3G bases, 1.5Gb	Transgenerational transmission of environmental information in C. elegans
SRR3703188	NCBI (GEO)	Illumina HiSeq 2000	31.6M spots, 3.2G bases, 1.5Gb	Transgenerational transmission of environmental information in C. elegans
SRR3703189	NCBI (GEO)	Illumina HiSeq 2000	29.9M spots, 3G bases, 1.4Gb	Transgenerational transmission of environmental information in C. elegans
SRR3703190	NCBI (GEO)	Illumina HiSeq 2000	37.4M spots, 3.7G bases, 1.7Gb	Transgenerational transmission of environmental information in C. elegans
SRR3703191	NCBI (GEO)	Illumina HiSeq 2000	34.5M spots, 3.4G bases, 1.6Gb	Transgenerational transmission of environmental information in C. elegans
SRR390728	BC Cancer Agency Michael Smith Genome Sciences Centre (BCCAGSC)	Illumina Genome Analyzer IIx	n/a	CGCI: Non-Hodgkin Lymphoma (NHL)
SRR4000324	NCBI (GEO)	Illumina HiSeq 2500	n/a	XRN2 Autoregulation and Control of Polycistronic Gene Expression in Caenorhabditis elegans
SRR4000325	NCBI (GEO)	Illumina HiSeq 2500	n/a	XRN2 Autoregulation and Control of Polycistronic Gene Expression in Caenorhabditis elegans
SRR4000326	NCBI (GEO)	Illumina HiSeq 2500	n/a	XRN2 Autoregulation and Control of Polycistronic Gene Expression in Caenorhabditis elegans
SRR4000327	NCBI (GEO)	Illumina HiSeq 2500	n/a	XRN2 Autoregulation and Control of Polycistronic Gene Expression in Caenorhabditis elegans
SRR4017994	NCBI (GEO)	Illumina HiSeq 2000	24.3M spots, 4.9G bases, 3.2Gb	Comparison of transcriptomes of sig-7 (RNAi) vs WT C. elegans early stage embryos by RNA-seq
SRR4017995	NCBI (GEO)	Illumina HiSeq 2000	25M spots, 5.1G bases, 3.3Gb	Comparison of transcriptomes of sig-7 (RNAi) vs WT C. elegans early stage embryos by RNA-seq
SRR4017996	NCBI (GEO)	Illumina HiSeq 2000	20.9M spots, 4.2G bases, 2.8Gb	Comparison of transcriptomes of sig-7 (RNAi) vs WT C. elegans early stage embryos by RNA-seq
SRR4017997	NCBI (GEO)	Illumina HiSeq 2000	23M spots, 4.6G bases, 3Gb	Comparison of transcriptomes of sig-7 (RNAi) vs WT C. elegans early stage embryos by RNA-seq
SRR4066103	NCBI (GEO)	Illumina HiSeq 2000	20.7M spots, 2.1G bases, 1.2Gb	LIN-28 balances longevity and germline stem cell number in C. elegans through let-7/AKT/DAF-16 axis
SRR4066104	NCBI (GEO)	Illumina HiSeq 2000	20.4M spots, 2G bases, 1.1Gb	LIN-28 balances longevity and germline stem cell number in C. elegans through let-7/AKT/DAF-16 axis
SRR4066105	NCBI (GEO)	Illumina HiSeq 2000	22.3M spots, 2.2G bases, 1.2Gb	LIN-28 balances longevity and germline stem cell number in C. elegans through let-7/AKT/DAF-16 axis
SRR4066106	NCBI (GEO)	Illumina HiSeq 2000	17.7M spots, 1.8G bases, 1,014.1Mb	LIN-28 balances longevity and germline stem cell number in C. elegans through let-7/AKT/DAF-16 axis
SRR4181026	NCBI (GEO)	Illumina HiSeq 2000	24M spots, 2.4G bases, 1.5Gb	Vitamin D Promotes Protein Homeostasis and Longevity via the Stress Response Pathway Genes SKN-1, IRE-1, and XBP-1
SRR4181027	NCBI (GEO)	Illumina HiSeq 2000	21.2M spots, 2.2G bases, 1.4Gb	Vitamin D Promotes Protein Homeostasis and Longevity via the Stress Response Pathway Genes SKN-1, IRE-1, and XBP-1
SRR4181028	NCBI (GEO)	Illumina HiSeq 2000	23.6M spots, 2.4G bases, 1.5Gb	Vitamin D Promotes Protein Homeostasis and Longevity via the Stress Response Pathway Genes SKN-1, IRE-1, and XBP-1
SRR4181029	NCBI (GEO)	Illumina HiSeq 2000	22.4M spots, 2.3G bases, 1.5Gb	Vitamin D Promotes Protein Homeostasis and Longevity via the Stress Response Pathway Genes SKN-1, IRE-1, and XBP-1
SRR4181030	NCBI (GEO)	Illumina HiSeq 2000	20.9M spots, 2.1G bases, 1.3Gb	Vitamin D Promotes Protein Homeostasis and Longevity via the Stress Response Pathway Genes SKN-1, IRE-1, and XBP-1
SRR4181031	NCBI (GEO)	Illumina HiSeq 2000	20.7M spots, 2.1G bases, 1.3Gb	Vitamin D Promotes Protein Homeostasis and Longevity via the Stress Response Pathway Genes SKN-1, IRE-1, and XBP-1
SRR4181032	NCBI (GEO)	Illumina HiSeq 2000	24.4M spots, 2.5G bases, 1.6Gb	Vitamin D Promotes Protein Homeostasis and Longevity via the Stress Response Pathway Genes SKN-1, IRE-1, and XBP-1
SRR4181033	NCBI (GEO)	Illumina HiSeq 2000	24.7M spots, 2.5G bases, 1.6Gb	Vitamin D Promotes Protein Homeostasis and Longevity via the Stress Response Pathway Genes SKN-1, IRE-1, and XBP-1
SRR4181034	NCBI (GEO)	Illumina HiSeq 2000	26.2M spots, 2.7G bases, 1.7Gb	Vitamin D Promotes Protein Homeostasis and Longevity via the Stress Response Pathway Genes SKN-1, IRE-1, and XBP-1
SRR4181035	NCBI (GEO)	Illumina HiSeq 2000	21.4M spots, 2.2G bases, 1.4Gb	Vitamin D Promotes Protein Homeostasis and Longevity via the Stress Response Pathway Genes SKN-1, IRE-1, and XBP-1
SRR4181036	NCBI (GEO)	Illumina HiSeq 2000	26.4M spots, 2.7G bases, 1.7Gb	Vitamin D Promotes Protein Homeostasis and Longevity via the Stress Response Pathway Genes SKN-1, IRE-1, and XBP-1
SRR4181037	NCBI (GEO)	Illumina HiSeq 2000	24.7M spots, 2.5G bases, 1.6Gb	Vitamin D Promotes Protein Homeostasis and Longevity via the Stress Response Pathway Genes SKN-1, IRE-1, and XBP-1
SRR4252559	Stanford University	NextSeq 500	23.2M spots, 7G bases, 3Gb	Transcriptomic profiling of germlines and intestines of C. elegans deficient in the COMPASS H3K4me3 methyltransferase complex
SRR4252560	Stanford University	NextSeq 500	22.2M spots, 6.7G bases, 2.8Gb	Transcriptomic profiling of germlines and intestines of C. elegans deficient in the COMPASS H3K4me3 methyltransferase complex
SRR4252561	Stanford University	NextSeq 500	23M spots, 6.9G bases, 2.9Gb	Transcriptomic profiling of germlines and intestines of C. elegans deficient in the COMPASS H3K4me3 methyltransferase complex
SRR4252562	Stanford University	NextSeq 500	23M spots, 7G bases, 2.9Gb	Transcriptomic profiling of germlines and intestines of C. elegans deficient in the COMPASS H3K4me3 methyltransferase complex
SRR4252563	Stanford University	NextSeq 500	21.1M spots, 6.4G bases, 2.6Gb	Transcriptomic profiling of germlines and intestines of C. elegans deficient in the COMPASS H3K4me3 methyltransferase complex
SRR4252564	Stanford University	NextSeq 500	19.7M spots, 5.9G bases, 2.5Gb	Transcriptomic profiling of germlines and intestines of C. elegans deficient in the COMPASS H3K4me3 methyltransferase complex
SRR4252565	Stanford University	NextSeq 500	22.2M spots, 6.7G bases, 2.8Gb	Transcriptomic profiling of germlines and intestines of C. elegans deficient in the COMPASS H3K4me3 methyltransferase complex
SRR4252576	Stanford University	NextSeq 500	18.4M spots, 5.6G bases, 2.3Gb	Transcriptomic profiling of germlines and intestines of C. elegans deficient in the COMPASS H3K4me3 methyltransferase complex
SRR4252577	Stanford University	NextSeq 500	23.1M spots, 7G bases, 2.9Gb	Transcriptomic profiling of germlines and intestines of C. elegans deficient in the COMPASS H3K4me3 methyltransferase complex
SRR4252578	Stanford University	NextSeq 500	17.9M spots, 5.4G bases, 2.3Gb	Transcriptomic profiling of germlines and intestines of C. elegans deficient in the COMPASS H3K4me3 methyltransferase complex
SRR4252579	Stanford University	NextSeq 500	28.2M spots, 8.5G bases, 3.6Gb	Transcriptomic profiling of germlines and intestines of C. elegans deficient in the COMPASS H3K4me3 methyltransferase complex
SRR4252580	Stanford University	NextSeq 500	26.2M spots, 7.9G bases, 3.6Gb	Transcriptomic profiling of germlines and intestines of C. elegans deficient in the COMPASS H3K4me3 methyltransferase complex
SRR4252585	Stanford University	NextSeq 500	34.3M spots, 10.4G bases, 4.3Gb	Transcriptomic profiling of germlines and intestines of C. elegans deficient in the COMPASS H3K4me3 methyltransferase complex
SRR4252590	Stanford University	NextSeq 500	44.1M spots, 13.3G bases, 5.5Gb	Transcriptomic profiling of germlines and intestines of C. elegans deficient in the COMPASS H3K4me3 methyltransferase complex
SRR4252591	Stanford University	NextSeq 500	29.8M spots, 9G bases, 3.8Gb	Transcriptomic profiling of germlines and intestines of C. elegans deficient in the COMPASS H3K4me3 methyltransferase complex
SRR4252592	Stanford University	NextSeq 500	26.5M spots, 8G bases, 3.3Gb	Transcriptomic profiling of germlines and intestines of C. elegans deficient in the COMPASS H3K4me3 methyltransferase complex
SRR4252593	Stanford University	NextSeq 500	32.5M spots, 9.8G bases, 4.1Gb	Transcriptomic profiling of germlines and intestines of C. elegans deficient in the COMPASS H3K4me3 methyltransferase complex
SRR4252594	Stanford University	NextSeq 500	31.7M spots, 9.6G bases, 4Gb	Transcriptomic profiling of germlines and intestines of C. elegans deficient in the COMPASS H3K4me3 methyltransferase complex
SRR4252595	Stanford University	NextSeq 500	30.4M spots, 9.2G bases, 3.8Gb	Transcriptomic profiling of germlines and intestines of C. elegans deficient in the COMPASS H3K4me3 methyltransferase complex
SRR4252596	Stanford University	NextSeq 500	29.6M spots, 8.9G bases, 3.7Gb	Transcriptomic profiling of germlines and intestines of C. elegans deficient in the COMPASS H3K4me3 methyltransferase complex
SRR4253131	Stanford University	NextSeq 500	28.2M spots, 8.5G bases, 3.6Gb	Transcriptomic profiling of germlines and intestines of C. elegans deficient in the COMPASS H3K4me3 methyltransferase complex
SRR4253132	Stanford University	NextSeq 500	26.2M spots, 7.9G bases, 3.6Gb	Transcriptomic profiling of germlines and intestines of C. elegans deficient in the COMPASS H3K4me3 methyltransferase complex
SRR4253133	Stanford University	NextSeq 500	23.2M spots, 7G bases, 3Gb	Transcriptomic profiling of germlines and intestines of C. elegans deficient in the COMPASS H3K4me3 methyltransferase complex
SRR4253134	Stanford University	NextSeq 500	22.2M spots, 6.7G bases, 2.8Gb	Transcriptomic profiling of germlines and intestines of C. elegans deficient in the COMPASS H3K4me3 methyltransferase complex
SRR4253135	Stanford University	NextSeq 500	23M spots, 6.9G bases, 2.9Gb	Transcriptomic profiling of germlines and intestines of C. elegans deficient in the COMPASS H3K4me3 methyltransferase complex
SRR4253136	Stanford University	NextSeq 500	23M spots, 7G bases, 2.9Gb	Transcriptomic profiling of germlines and intestines of C. elegans deficient in the COMPASS H3K4me3 methyltransferase complex
SRR4253137	Stanford University	NextSeq 500	21.1M spots, 6.4G bases, 2.6Gb	Transcriptomic profiling of germlines and intestines of C. elegans deficient in the COMPASS H3K4me3 methyltransferase complex
SRR4253138	Stanford University	NextSeq 500	19.7M spots, 5.9G bases, 2.5Gb	Transcriptomic profiling of germlines and intestines of C. elegans deficient in the COMPASS H3K4me3 methyltransferase complex
SRR4253139	Stanford University	NextSeq 500	22.2M spots, 6.7G bases, 2.8Gb	Transcriptomic profiling of germlines and intestines of C. elegans deficient in the COMPASS H3K4me3 methyltransferase complex
SRR4253140	Stanford University	NextSeq 500	18.4M spots, 5.6G bases, 2.3Gb	Transcriptomic profiling of germlines and intestines of C. elegans deficient in the COMPASS H3K4me3 methyltransferase complex
SRR4253141	Stanford University	NextSeq 500	23.1M spots, 7G bases, 2.9Gb	Transcriptomic profiling of germlines and intestines of C. elegans deficient in the COMPASS H3K4me3 methyltransferase complex
SRR4253142	Stanford University	NextSeq 500	17.9M spots, 5.4G bases, 2.3Gb	Transcriptomic profiling of germlines and intestines of C. elegans deficient in the COMPASS H3K4me3 methyltransferase complex
SRR4253143	Stanford University	NextSeq 500	34.3M spots, 10.4G bases, 4.3Gb	Transcriptomic profiling of germlines and intestines of C. elegans deficient in the COMPASS H3K4me3 methyltransferase complex
SRR4253144	Stanford University	NextSeq 500	44.1M spots, 13.3G bases, 5.5Gb	Transcriptomic profiling of germlines and intestines of C. elegans deficient in the COMPASS H3K4me3 methyltransferase complex
SRR4253145	Stanford University	NextSeq 500	29.8M spots, 9G bases, 3.8Gb	Transcriptomic profiling of germlines and intestines of C. elegans deficient in the COMPASS H3K4me3 methyltransferase complex
SRR4253146	Stanford University	NextSeq 500	26.5M spots, 8G bases, 3.3Gb	Transcriptomic profiling of germlines and intestines of C. elegans deficient in the COMPASS H3K4me3 methyltransferase complex
SRR4253147	Stanford University	NextSeq 500	32.5M spots, 9.8G bases, 4.1Gb	Transcriptomic profiling of germlines and intestines of C. elegans deficient in the COMPASS H3K4me3 methyltransferase complex
SRR4253148	Stanford University	NextSeq 500	31.7M spots, 9.6G bases, 4Gb	Transcriptomic profiling of germlines and intestines of C. elegans deficient in the COMPASS H3K4me3 methyltransferase complex
SRR4253149	Stanford University	NextSeq 500	30.4M spots, 9.2G bases, 3.8Gb	Transcriptomic profiling of germlines and intestines of C. elegans deficient in the COMPASS H3K4me3 methyltransferase complex
SRR4253150	Stanford University	NextSeq 500	29.6M spots, 8.9G bases, 3.7Gb	Transcriptomic profiling of germlines and intestines of C. elegans deficient in the COMPASS H3K4me3 methyltransferase complex
SRR4255613	NCBI (GEO)	Illumina HiSeq 2500	58M spots, 5.8G bases, 2Gb	mRNA Next Generation Sequencing of long-lived C. elegans mutants lacking the replication-independent histone variant H3.3
SRR4478608	NCBI (GEO)	Illumina HiSeq 2500	34.9M spots, 8.8G bases, 4.3Gb	Gene expression changes in dauer defective strains
SRR4478609	NCBI (GEO)	Illumina HiSeq 2500	33.9M spots, 8.6G bases, 4.2Gb	Gene expression changes in dauer defective strains
SRR4478610	NCBI (GEO)	Illumina HiSeq 2500	38.2M spots, 9.6G bases, 4.8Gb	Gene expression changes in dauer defective strains
SRR4478611	NCBI (GEO)	Illumina HiSeq 2500	38M spots, 9.6G bases, 4.7Gb	Gene expression changes in dauer defective strains
SRR4478612	NCBI (GEO)	Illumina HiSeq 2500	44.2M spots, 11.1G bases, 5.4Gb	Gene expression changes in dauer defective strains
SRR4478613	NCBI (GEO)	Illumina HiSeq 2500	29.3M spots, 7.4G bases, 3.7Gb	Gene expression changes in dauer defective strains
SRR4478614	NCBI (GEO)	Illumina HiSeq 2500	31.3M spots, 7.9G bases, 3.9Gb	Gene expression changes in dauer defective strains
SRR4478615	NCBI (GEO)	Illumina HiSeq 2500	35.1M spots, 8.8G bases, 4.4Gb	Gene expression changes in dauer defective strains
SRR4478616	NCBI (GEO)	Illumina HiSeq 2500	22.9M spots, 5.8G bases, 2.9Gb	Gene expression changes in dauer defective strains
SRR4478617	NCBI (GEO)	Illumina HiSeq 2500	35.6M spots, 9G bases, 4.4Gb	Gene expression changes in dauer defective strains
SRR4478618	NCBI (GEO)	Illumina HiSeq 2500	41.3M spots, 10.4G bases, 5Gb	Gene expression changes in dauer defective strains
SRR4478619	NCBI (GEO)	Illumina HiSeq 2500	33.4M spots, 8.4G bases, 4.1Gb	Gene expression changes in dauer defective strains
SRR4478620	NCBI (GEO)	Illumina HiSeq 2500	32.5M spots, 8.2G bases, 4Gb	Gene expression changes in dauer defective strains
SRR4478621	NCBI (GEO)	Illumina HiSeq 2500	29.2M spots, 7.4G bases, 3.5Gb	Gene expression changes in dauer defective strains
SRR4478622	NCBI (GEO)	Illumina HiSeq 2500	35M spots, 8.8G bases, 4.3Gb	Gene expression changes in dauer defective strains
SRR4478623	NCBI (GEO)	Illumina HiSeq 2500	39M spots, 9.8G bases, 4.7Gb	Gene expression changes in dauer defective strains
SRR4478624	NCBI (GEO)	Illumina HiSeq 2500	25.4M spots, 6.4G bases, 3.1Gb	Gene expression changes in dauer defective strains
SRR4478625	NCBI (GEO)	Illumina HiSeq 2500	32.7M spots, 8.2G bases, 4Gb	Gene expression changes in dauer defective strains
SRR4478626	NCBI (GEO)	Illumina HiSeq 2500	41.9M spots, 10.6G bases, 5.1Gb	Gene expression changes in dauer defective strains
SRR4478627	NCBI (GEO)	Illumina HiSeq 2500	39.3M spots, 9.9G bases, 4.9Gb	Gene expression changes in dauer defective strains
SRR4478628	NCBI (GEO)	Illumina HiSeq 2500	34.2M spots, 8.6G bases, 4.2Gb	Gene expression changes in dauer defective strains
SRR4478629	NCBI (GEO)	Illumina HiSeq 2500	37M spots, 9.3G bases, 4.6Gb	Gene expression changes in dauer defective strains
SRR4478630	NCBI (GEO)	Illumina HiSeq 2500	36.7M spots, 9.3G bases, 4.5Gb	Gene expression changes in dauer defective strains
SRR4478631	NCBI (GEO)	Illumina HiSeq 2500	31.1M spots, 7.8G bases, 3.8Gb	Gene expression changes in dauer defective strains
SRR4478632	NCBI (GEO)	Illumina HiSeq 2500	26.9M spots, 6.8G bases, 3.3Gb	Gene expression changes in dauer defective strains
SRR4478633	NCBI (GEO)	Illumina HiSeq 2500	29.3M spots, 7.4G bases, 3.6Gb	Gene expression changes in dauer defective strains
SRR4478634	NCBI (GEO)	Illumina HiSeq 2500	29M spots, 7.3G bases, 3.6Gb	Gene expression changes in dauer defective strains
SRR4478635	NCBI (GEO)	Illumina HiSeq 2500	30.6M spots, 7.7G bases, 3.8Gb	Gene expression changes in dauer defective strains
SRR4478636	NCBI (GEO)	Illumina HiSeq 2500	40.6M spots, 10.2G bases, 5Gb	Gene expression changes in dauer defective strains
SRR4478637	NCBI (GEO)	Illumina HiSeq 2500	35.5M spots, 8.9G bases, 4.5Gb	Gene expression changes in dauer defective strains
SRR4478638	NCBI (GEO)	Illumina HiSeq 2500	40.3M spots, 10.2G bases, 5Gb	Gene expression changes in dauer defective strains
SRR4478639	NCBI (GEO)	Illumina HiSeq 2500	35.2M spots, 8.9G bases, 4.4Gb	Gene expression changes in dauer defective strains
SRR4478640	NCBI (GEO)	Illumina HiSeq 2500	36.5M spots, 9.2G bases, 4.6Gb	Gene expression changes in dauer defective strains
SRR4478641	NCBI (GEO)	Illumina HiSeq 2500	44.2M spots, 11.1G bases, 5.6Gb	Gene expression changes in dauer defective strains
SRR4478642	NCBI (GEO)	Illumina HiSeq 2500	46.1M spots, 11.6G bases, 5.8Gb	Gene expression changes in dauer defective strains
SRR5051663	University of Macau	Illumina HiSeq 2000	39.9M spots, 7.2G bases, 4.5Gb	Caenorhabditis elegans Raw sequence reads JMJD-1.2 mutant embryos
SRR5051664	University of Macau	Illumina HiSeq 2000	34.7M spots, 6.2G bases, 4Gb	Caenorhabditis elegans Raw sequence reads JMJD-1.2 mutant embryos
SRR5051665	University of Macau	Illumina HiSeq 2000	43.2M spots, 7.8G bases, 4.9Gb	Caenorhabditis elegans Raw sequence reads JMJD-1.2 mutant embryos
SRR5051666	University of Macau	Illumina HiSeq 2000	37.8M spots, 6.8G bases, 4.3Gb	Caenorhabditis elegans Raw sequence reads JMJD-1.2 mutant embryos
SRR5067779	NCBI (GEO)	Illumina HiSeq 2000	32.5M spots, 3.3G bases, 1.5Gb	Transgenerational transmission of environmental information in C. elegans
SRR5067780	NCBI (GEO)	Illumina HiSeq 2000	28.5M spots, 2.9G bases, 1.3Gb	Transgenerational transmission of environmental information in C. elegans
SRR5067781	NCBI (GEO)	Illumina HiSeq 2000	28.1M spots, 2.8G bases, 1.3Gb	Transgenerational transmission of environmental information in C. elegans
SRR5079710	NCBI (GEO)	Illumina HiSeq 2000	26.1M spots, 2.6G bases, 887.2Mb	RNA-dependent RNA polymerases-synthesized antisense ribosomal siRNAs silence pre-rRNA via the nuclear RNAi pathway in C. elegans
SRR5091919	NCBI (GEO)	NextSeq 500	33.9M spots, 5.1G bases, 893.2Mb	RNA-seq of N2 and lin-45(n2018) mutant C.elegans responses to osmotic stress
SRR5091920	NCBI (GEO)	NextSeq 500	35.7M spots, 5.4G bases, 923.4Mb	RNA-seq of N2 and lin-45(n2018) mutant C.elegans responses to osmotic stress
SRR5091921	NCBI (GEO)	NextSeq 500	36.4M spots, 5.5G bases, 941.6Mb	RNA-seq of N2 and lin-45(n2018) mutant C.elegans responses to osmotic stress
SRR5091922	NCBI (GEO)	NextSeq 500	35.7M spots, 5.4G bases, 911.7Mb	RNA-seq of N2 and lin-45(n2018) mutant C.elegans responses to osmotic stress
SRR5091923	NCBI (GEO)	NextSeq 500	35.6M spots, 5.3G bases, 936.9Mb	RNA-seq of N2 and lin-45(n2018) mutant C.elegans responses to osmotic stress
SRR5091924	NCBI (GEO)	NextSeq 500	27.9M spots, 4.2G bases, 724Mb	RNA-seq of N2 and lin-45(n2018) mutant C.elegans responses to osmotic stress
SRR5091925	NCBI (GEO)	NextSeq 500	36.9M spots, 5.5G bases, 949.3Mb	RNA-seq of N2 and lin-45(n2018) mutant C.elegans responses to osmotic stress
SRR5091926	NCBI (GEO)	NextSeq 500	34.1M spots, 5.1G bases, 894Mb	RNA-seq of N2 and lin-45(n2018) mutant C.elegans responses to osmotic stress
SRR5091927	NCBI (GEO)	NextSeq 500	39.4M spots, 5.9G bases, 1,008Mb	RNA-seq of N2 and lin-45(n2018) mutant C.elegans responses to osmotic stress
SRR5091928	NCBI (GEO)	NextSeq 500	38.5M spots, 5.8G bases, 989.7Mb	RNA-seq of N2 and lin-45(n2018) mutant C.elegans responses to osmotic stress
SRR5177728	Harvard University	Illumina HiSeq 2500	25.8M spots, 3.2G bases, 947.4Mb	Phlox pilosa Assembly
SRR5202807	NCBI (GEO)	Illumina HiSeq 2500	22.5M spots, 6.8G bases, 4.3Gb	Analysis of nonsense-mediated mRNA decay in daf-2 mutants
SRR5202808	NCBI (GEO)	Illumina HiSeq 2500	22.5M spots, 6.8G bases, 4.3Gb	Analysis of nonsense-mediated mRNA decay in daf-2 mutants
SRR5202809	NCBI (GEO)	Illumina HiSeq 2500	22.1M spots, 6.7G bases, 4.2Gb	Analysis of nonsense-mediated mRNA decay in daf-2 mutants
SRR5202810	NCBI (GEO)	Illumina HiSeq 2500	21.4M spots, 6.5G bases, 4Gb	Analysis of nonsense-mediated mRNA decay in daf-2 mutants
SRR5202811	NCBI (GEO)	Illumina HiSeq 2500	19.6M spots, 5.9G bases, 3.7Gb	Analysis of nonsense-mediated mRNA decay in daf-2 mutants
SRR5202812	NCBI (GEO)	Illumina HiSeq 2500	23.2M spots, 7G bases, 4.4Gb	Analysis of nonsense-mediated mRNA decay in daf-2 mutants
SRR5202813	NCBI (GEO)	Illumina HiSeq 2500	23M spots, 6.9G bases, 4.3Gb	Analysis of nonsense-mediated mRNA decay in daf-2 mutants
SRR5202814	NCBI (GEO)	Illumina HiSeq 2500	20.7M spots, 6.3G bases, 3.9Gb	Analysis of nonsense-mediated mRNA decay in daf-2 mutants
SRR5253683	NCBI (GEO)	Illumina HiSeq 2500	2.5M spots, 636M bases, 296.6Mb	Analysis of C. elegans muscle transcriptome using trans-splicing-based RNA tagging (SRT)
SRR5253684	NCBI (GEO)	Illumina HiSeq 2500	4.2M spots, 1G bases, 485.4Mb	Analysis of C. elegans muscle transcriptome using trans-splicing-based RNA tagging (SRT)
SRR5253685	NCBI (GEO)	Illumina HiSeq 2500	3.1M spots, 776.3M bases, 388Mb	Analysis of C. elegans muscle transcriptome using trans-splicing-based RNA tagging (SRT)
SRR5253686	NCBI (GEO)	Illumina HiSeq 2500	9.7M spots, 2.4G bases, 1.1Gb	Analysis of C. elegans muscle transcriptome using trans-splicing-based RNA tagging (SRT)
SRR5253687	NCBI (GEO)	Illumina HiSeq 2500	5.4M spots, 1.1G bases, 541.3Mb	Analysis of C. elegans muscle transcriptome using trans-splicing-based RNA tagging (SRT)
SRR5253688	NCBI (GEO)	Illumina HiSeq 2500	15M spots, 3.8G bases, 1.9Gb	Analysis of C. elegans muscle transcriptome using trans-splicing-based RNA tagging (SRT)
SRR5253689	NCBI (GEO)	Illumina HiSeq 2500	1.6M spots, 317.1M bases, 216.7Mb	Analysis of C. elegans muscle transcriptome using trans-splicing-based RNA tagging (SRT)
SRR5253690	NCBI (GEO)	Illumina HiSeq 2500	4.3M spots, 851.3M bases, 448Mb	Analysis of C. elegans muscle transcriptome using trans-splicing-based RNA tagging (SRT)
SRR5253691	NCBI (GEO)	Illumina HiSeq 2500	4.5M spots, 901.2M bases, 473.7Mb	Analysis of C. elegans muscle transcriptome using trans-splicing-based RNA tagging (SRT)
SRR5253692	NCBI (GEO)	Illumina HiSeq 2500	4.4M spots, 1.1G bases, 523.9Mb	Analysis of C. elegans muscle transcriptome using trans-splicing-based RNA tagging (SRT)
SRR5253693	NCBI (GEO)	Illumina HiSeq 2500	3.4M spots, 686M bases, 359.2Mb	Analysis of C. elegans muscle transcriptome using trans-splicing-based RNA tagging (SRT)
SRR5253694	NCBI (GEO)	Illumina HiSeq 2500	5.4M spots, 1.1G bases, 547.6Mb	Analysis of C. elegans muscle transcriptome using trans-splicing-based RNA tagging (SRT)
SRR5253695	NCBI (GEO)	Illumina HiSeq 2500	4.8M spots, 1.2G bases, 564.8Mb	Analysis of C. elegans muscle transcriptome using trans-splicing-based RNA tagging (SRT)
SRR5253696	NCBI (GEO)	Illumina HiSeq 2500	4M spots, 795.5M bases, 421.8Mb	Analysis of C. elegans muscle transcriptome using trans-splicing-based RNA tagging (SRT)
SRR5253697	NCBI (GEO)	Illumina HiSeq 2500	3M spots, 602M bases, 318Mb	Analysis of C. elegans muscle transcriptome using trans-splicing-based RNA tagging (SRT)
SRR5322181	Baylor College of Medicine	Illumina HiSeq 2000	61.5M spots, 12.3G bases, 8.3Gb	RNAseq of C. elegans N2 raised on LB- and M9-cultured E. coli MG1655
SRR5322182	Baylor College of Medicine	Illumina HiSeq 2000	53.7M spots, 10.7G bases, 7.3Gb	RNAseq of C. elegans N2 raised on LB- and M9-cultured E. coli MG1655
SRR5322183	Baylor College of Medicine	Illumina HiSeq 2000	57.5M spots, 11.5G bases, 7.8Gb	RNAseq of C. elegans N2 raised on LB- and M9-cultured E. coli MG1655
SRR5322184	Baylor College of Medicine	Illumina HiSeq 2000	56.9M spots, 11.4G bases, 7.7Gb	RNAseq of C. elegans N2 raised on LB- and M9-cultured E. coli MG1655
SRR5322185	Baylor College of Medicine	Illumina HiSeq 2000	65.3M spots, 13.1G bases, 8.8Gb	RNAseq of C. elegans N2 raised on LB- and M9-cultured E. coli MG1655
SRR5322186	Baylor College of Medicine	Illumina HiSeq 2000	60.7M spots, 12.1G bases, 8.2Gb	RNAseq of C. elegans N2 raised on LB- and M9-cultured E. coli MG1655
SRR548309	Gene Expression Omnibus (GEO)	Illumina Genome Analyzer IIx	24.4M spots, 3.7G bases, 2.5Gb	Multiple insert size paired-end sequencing for deconvolution of complex transcriptomes
SRR548310	Gene Expression Omnibus (GEO)	Illumina Genome Analyzer IIx	26M spots, 4G bases, 2.7Gb	Multiple insert size paired-end sequencing for deconvolution of complex transcriptomes
SRR548311	Gene Expression Omnibus (GEO)	Illumina Genome Analyzer IIx	32.5M spots, 5.2G bases, 2.4Gb	Multiple insert size paired-end sequencing for deconvolution of complex transcriptomes
SRR548312	Gene Expression Omnibus (GEO)	Illumina Genome Analyzer IIx	23.8M spots, 3.8G bases, 1.7Gb	Multiple insert size paired-end sequencing for deconvolution of complex transcriptomes
SRR5534733	NCBI (GEO)	NextSeq 500	39.2M spots, 6.1G bases, 2.1Gb	The C. elegans neural editome reveals an ADAR target mRNA required for proper chemotaxis
SRR5534734	NCBI (GEO)	NextSeq 500	16.8M spots, 2.6G bases, 948.2Mb	The C. elegans neural editome reveals an ADAR target mRNA required for proper chemotaxis
SRR5534735	NCBI (GEO)	NextSeq 500	27.6M spots, 4.3G bases, 1.5Gb	The C. elegans neural editome reveals an ADAR target mRNA required for proper chemotaxis
SRR5534736	NCBI (GEO)	NextSeq 500	34.1M spots, 5.3G bases, 1.9Gb	The C. elegans neural editome reveals an ADAR target mRNA required for proper chemotaxis
SRR5534737	NCBI (GEO)	NextSeq 500	38.7M spots, 6G bases, 2.1Gb	The C. elegans neural editome reveals an ADAR target mRNA required for proper chemotaxis
SRR5534738	NCBI (GEO)	NextSeq 500	48.9M spots, 7.6G bases, 2.7Gb	The C. elegans neural editome reveals an ADAR target mRNA required for proper chemotaxis
SRR5564855	NCBI (GEO)	Illumina HiSeq 2500	34.1M spots, 10.2G bases, 3.6Gb	ALG-5 is a miRNA-associated Argonaute required for proper developmental timing in the Caenorhabditis elegans germline
SRR5564856	NCBI (GEO)	Illumina HiSeq 2500	35.6M spots, 10.7G bases, 3.8Gb	ALG-5 is a miRNA-associated Argonaute required for proper developmental timing in the Caenorhabditis elegans germline
SRR5564857	NCBI (GEO)	Illumina HiSeq 2500	30.4M spots, 9.1G bases, 3.3Gb	ALG-5 is a miRNA-associated Argonaute required for proper developmental timing in the Caenorhabditis elegans germline
SRR5564858	NCBI (GEO)	Illumina HiSeq 2500	31.6M spots, 9.5G bases, 3.4Gb	ALG-5 is a miRNA-associated Argonaute required for proper developmental timing in the Caenorhabditis elegans germline
SRR5564859	NCBI (GEO)	Illumina HiSeq 2500	24.1M spots, 7.2G bases, 2.6Gb	ALG-5 is a miRNA-associated Argonaute required for proper developmental timing in the Caenorhabditis elegans germline
SRR5564860	NCBI (GEO)	Illumina HiSeq 2500	24.5M spots, 7.4G bases, 2.6Gb	ALG-5 is a miRNA-associated Argonaute required for proper developmental timing in the Caenorhabditis elegans germline
SRR5564861	NCBI (GEO)	Illumina HiSeq 2500	25.6M spots, 7.7G bases, 2.7Gb	ALG-5 is a miRNA-associated Argonaute required for proper developmental timing in the Caenorhabditis elegans germline
SRR5564862	NCBI (GEO)	Illumina HiSeq 2500	29.1M spots, 8.7G bases, 3.1Gb	ALG-5 is a miRNA-associated Argonaute required for proper developmental timing in the Caenorhabditis elegans germline
SRR5564863	NCBI (GEO)	Illumina HiSeq 2500	35M spots, 10.5G bases, 3.7Gb	ALG-5 is a miRNA-associated Argonaute required for proper developmental timing in the Caenorhabditis elegans germline
SRR5564864	NCBI (GEO)	Illumina HiSeq 2500	44.1M spots, 13.2G bases, 4.7Gb	ALG-5 is a miRNA-associated Argonaute required for proper developmental timing in the Caenorhabditis elegans germline
SRR5564865	NCBI (GEO)	Illumina HiSeq 2500	42.9M spots, 12.9G bases, 4.7Gb	ALG-5 is a miRNA-associated Argonaute required for proper developmental timing in the Caenorhabditis elegans germline
SRR5564866	NCBI (GEO)	Illumina HiSeq 2500	37.3M spots, 11.2G bases, 4Gb	ALG-5 is a miRNA-associated Argonaute required for proper developmental timing in the Caenorhabditis elegans germline
SRR5564867	NCBI (GEO)	Illumina HiSeq 2500	38M spots, 11.4G bases, 4Gb	ALG-5 is a miRNA-associated Argonaute required for proper developmental timing in the Caenorhabditis elegans germline
SRR5564868	NCBI (GEO)	Illumina HiSeq 2500	27.5M spots, 8.2G bases, 2.9Gb	ALG-5 is a miRNA-associated Argonaute required for proper developmental timing in the Caenorhabditis elegans germline
SRR5564869	NCBI (GEO)	Illumina HiSeq 2500	27.8M spots, 8.3G bases, 3Gb	ALG-5 is a miRNA-associated Argonaute required for proper developmental timing in the Caenorhabditis elegans germline
SRR5606847	National Institute of Immunology	Illumina HiSeq 2500	17.9M spots, 3.6G bases, 1.8Gb	Caenorhabditis elegans Transcriptome or Gene expression
SRR5606848	National Institute of Immunology	Illumina HiSeq 2500	18.4M spots, 3.7G bases, 1.8Gb	Caenorhabditis elegans Transcriptome or Gene expression
SRR5606849	National Institute of Immunology	Illumina HiSeq 2500	19.9M spots, 4G bases, 2Gb	Caenorhabditis elegans Transcriptome or Gene expression
SRR5606850	National Institute of Immunology	Illumina HiSeq 2500	19.8M spots, 4G bases, 1.9Gb	Caenorhabditis elegans Transcriptome or Gene expression
SRR5606851	National Institute of Immunology	Illumina HiSeq 2500	20M spots, 4G bases, 1.9Gb	Caenorhabditis elegans Transcriptome or Gene expression
SRR5606852	National Institute of Immunology	Illumina HiSeq 2500	19.2M spots, 3.9G bases, 1.9Gb	Caenorhabditis elegans Transcriptome or Gene expression
SRR5606853	National Institute of Immunology	Illumina HiSeq 2500	18.3M spots, 3.7G bases, 1.8Gb	Caenorhabditis elegans Transcriptome or Gene expression
SRR5606854	National Institute of Immunology	Illumina HiSeq 2500	19.7M spots, 4G bases, 1.9Gb	Caenorhabditis elegans Transcriptome or Gene expression
SRR5606855	National Institute of Immunology	Illumina HiSeq 2500	21.5M spots, 4.3G bases, 2.1Gb	Caenorhabditis elegans Transcriptome or Gene expression
SRR5606856	National Institute of Immunology	Illumina HiSeq 2500	20.9M spots, 4.2G bases, 2Gb	Caenorhabditis elegans Transcriptome or Gene expression
SRR5753101	Cold Spring Harbor Laboratory	NextSeq 500	11.8M spots, 2.9G bases, 1.5Gb	Global Gene Expression profile in homozygous frk-1(ok760) mutants versus wildtype in the nematode, Caenorhabditis elegans using RNA Seq
SRR5753102	Cold Spring Harbor Laboratory	NextSeq 500	11.7M spots, 2.9G bases, 1.5Gb	Global Gene Expression profile in homozygous frk-1(ok760) mutants versus wildtype in the nematode, Caenorhabditis elegans using RNA Seq
SRR5753103	Cold Spring Harbor Laboratory	NextSeq 500	12.4M spots, 3.1G bases, 1.6Gb	Global Gene Expression profile in homozygous frk-1(ok760) mutants versus wildtype in the nematode, Caenorhabditis elegans using RNA Seq
SRR5753104	Cold Spring Harbor Laboratory	NextSeq 500	12.9M spots, 3.2G bases, 1.7Gb	Global Gene Expression profile in homozygous frk-1(ok760) mutants versus wildtype in the nematode, Caenorhabditis elegans using RNA Seq
SRR5753105	Cold Spring Harbor Laboratory	NextSeq 500	11.7M spots, 2.9G bases, 1.5Gb	Global Gene Expression profile in homozygous frk-1(ok760) mutants versus wildtype in the nematode, Caenorhabditis elegans using RNA Seq
SRR5753106	Cold Spring Harbor Laboratory	NextSeq 500	11.9M spots, 3G bases, 1.5Gb	Global Gene Expression profile in homozygous frk-1(ok760) mutants versus wildtype in the nematode, Caenorhabditis elegans using RNA Seq
SRR5849891	NCBI (GEO)	Illumina HiSeq 2500	n/a	Transcriptomic analysis of wild-type and lin-22 mutants in C.elegans
SRR5849892	NCBI (GEO)	Illumina HiSeq 2500	n/a	Transcriptomic analysis of wild-type and lin-22 mutants in C.elegans
SRR5849893	NCBI (GEO)	Illumina HiSeq 2500	n/a	Transcriptomic analysis of wild-type and lin-22 mutants in C.elegans
SRR5849894	NCBI (GEO)	Illumina HiSeq 2500	n/a	Transcriptomic analysis of wild-type and lin-22 mutants in C.elegans
SRR5849895	NCBI (GEO)	Illumina HiSeq 2500	n/a	Transcriptomic analysis of wild-type and lin-22 mutants in C.elegans
SRR5849896	NCBI (GEO)	Illumina HiSeq 2500	n/a	Transcriptomic analysis of wild-type and lin-22 mutants in C.elegans
SRR5849897	NCBI (GEO)	Illumina HiSeq 2500	n/a	Transcriptomic analysis of wild-type and lin-22 mutants in C.elegans
SRR5849898	NCBI (GEO)	Illumina HiSeq 2500	n/a	Transcriptomic analysis of wild-type and lin-22 mutants in C.elegans
SRR5849899	NCBI (GEO)	Illumina HiSeq 2500	n/a	Transcriptomic analysis of wild-type and lin-22 mutants in C.elegans
SRR5849900	NCBI (GEO)	Illumina HiSeq 2500	n/a	Transcriptomic analysis of wild-type and lin-22 mutants in C.elegans
SRR5849901	NCBI (GEO)	Illumina HiSeq 2500	n/a	Transcriptomic analysis of wild-type and lin-22 mutants in C.elegans
SRR5849902	NCBI (GEO)	Illumina HiSeq 2500	n/a	Transcriptomic analysis of wild-type and lin-22 mutants in C.elegans
SRR5849903	NCBI (GEO)	Illumina HiSeq 2500	n/a	Transcriptomic analysis of wild-type and lin-22 mutants in C.elegans
SRR5849904	NCBI (GEO)	Illumina HiSeq 2500	n/a	Transcriptomic analysis of wild-type and lin-22 mutants in C.elegans
SRR5849905	NCBI (GEO)	Illumina HiSeq 2500	n/a	Transcriptomic analysis of wild-type and lin-22 mutants in C.elegans
SRR5849906	NCBI (GEO)	Illumina HiSeq 2500	n/a	Transcriptomic analysis of wild-type and lin-22 mutants in C.elegans
SRR5849907	NCBI (GEO)	Illumina HiSeq 2500	n/a	Transcriptomic analysis of wild-type and lin-22 mutants in C.elegans
SRR5849908	NCBI (GEO)	Illumina HiSeq 2500	n/a	Transcriptomic analysis of wild-type and lin-22 mutants in C.elegans
SRR5849909	NCBI (GEO)	Illumina HiSeq 2500	n/a	Transcriptomic analysis of wild-type and lin-22 mutants in C.elegans
SRR5849910	NCBI (GEO)	Illumina HiSeq 2500	n/a	Transcriptomic analysis of wild-type and lin-22 mutants in C.elegans
SRR5849911	NCBI (GEO)	Illumina HiSeq 2500	n/a	Transcriptomic analysis of wild-type and lin-22 mutants in C.elegans
SRR5849912	NCBI (GEO)	Illumina HiSeq 2500	n/a	Transcriptomic analysis of wild-type and lin-22 mutants in C.elegans
SRR5849913	NCBI (GEO)	Illumina HiSeq 2500	n/a	Transcriptomic analysis of wild-type and lin-22 mutants in C.elegans
SRR5849914	NCBI (GEO)	Illumina HiSeq 2500	n/a	Transcriptomic analysis of wild-type and lin-22 mutants in C.elegans
SRR5851336	Baylor College of Medicine	NextSeq 500	11.3M spots, 1.9G bases, 765Mb	RNA-seq of C.elegans sma-4(rax3), sma-2(rax5) and wild-type strains
SRR5851337	Baylor College of Medicine	NextSeq 500	7.4M spots, 1.3G bases, 499.1Mb	RNA-seq of C.elegans sma-4(rax3), sma-2(rax5) and wild-type strains
SRR5851338	Baylor College of Medicine	NextSeq 500	1.8M spots, 314.4M bases, 126.5Mb	RNA-seq of C.elegans sma-4(rax3), sma-2(rax5) and wild-type strains
SRR5851339	Baylor College of Medicine	NextSeq 500	5M spots, 844.8M bases, 337.6Mb	RNA-seq of C.elegans sma-4(rax3), sma-2(rax5) and wild-type strains
SRR5851340	Baylor College of Medicine	NextSeq 500	8.2M spots, 1.4G bases, 557.9Mb	RNA-seq of C.elegans sma-4(rax3), sma-2(rax5) and wild-type strains
SRR5851341	Baylor College of Medicine	NextSeq 500	9.2M spots, 1.6G bases, 625.9Mb	RNA-seq of C.elegans sma-4(rax3), sma-2(rax5) and wild-type strains
SRR5851342	Baylor College of Medicine	NextSeq 500	6.1M spots, 1G bases, 413.7Mb	RNA-seq of C.elegans sma-4(rax3), sma-2(rax5) and wild-type strains
SRR5851343	Baylor College of Medicine	NextSeq 500	8M spots, 1.4G bases, 547.3Mb	RNA-seq of C.elegans sma-4(rax3), sma-2(rax5) and wild-type strains
SRR5851344	Baylor College of Medicine	NextSeq 500	5.2M spots, 881.7M bases, 356.5Mb	RNA-seq of C.elegans sma-4(rax3), sma-2(rax5) and wild-type strains
SRR629994	Gene Expression Omnibus (GEO)	Illumina HiSeq 2000	29M spots, 2.9G bases, 1.7Gb	The landscape of RNA polymerase II transcription initiation in C. elegans reveals a novel regulatory architecture
SRR629996	Gene Expression Omnibus (GEO)	Illumina Genome Analyzer IIx	27.6M spots, 2.8G bases, 1.6Gb	The landscape of RNA polymerase II transcription initiation in C. elegans reveals a novel regulatory architecture
SRR629997	Gene Expression Omnibus (GEO)	Illumina Genome Analyzer IIx	30.7M spots, 3.1G bases, 1.8Gb	The landscape of RNA polymerase II transcription initiation in C. elegans reveals a novel regulatory architecture
SRR765840	Gene Expression Omnibus (GEO)	Illumina Genome Analyzer IIx	23.1M spots, 3.5G bases, 2.3Gb	Next generation sequencing facilitates quantitative analysis of Caenorhabditis elegans N2 wild type, emr-1(gk119), lem-2(tm1582) and emr-1(RNAi) lem-2(tm1582) transcriptomes.
SRR765841	Gene Expression Omnibus (GEO)	Illumina Genome Analyzer IIx	21.4M spots, 3.2G bases, 2.1Gb	Next generation sequencing facilitates quantitative analysis of Caenorhabditis elegans N2 wild type, emr-1(gk119), lem-2(tm1582) and emr-1(RNAi) lem-2(tm1582) transcriptomes.
SRR765842	Gene Expression Omnibus (GEO)	Illumina Genome Analyzer IIx	21.7M spots, 3.3G bases, 2.2Gb	Next generation sequencing facilitates quantitative analysis of Caenorhabditis elegans N2 wild type, emr-1(gk119), lem-2(tm1582) and emr-1(RNAi) lem-2(tm1582) transcriptomes.
SRR765843	Gene Expression Omnibus (GEO)	Illumina Genome Analyzer IIx	20M spots, 3G bases, 2Gb	Next generation sequencing facilitates quantitative analysis of Caenorhabditis elegans N2 wild type, emr-1(gk119), lem-2(tm1582) and emr-1(RNAi) lem-2(tm1582) transcriptomes.
SRR765844	Gene Expression Omnibus (GEO)	Illumina Genome Analyzer IIx	16.2M spots, 2.4G bases, 1.6Gb	Next generation sequencing facilitates quantitative analysis of Caenorhabditis elegans N2 wild type, emr-1(gk119), lem-2(tm1582) and emr-1(RNAi) lem-2(tm1582) transcriptomes.
SRR765845	Gene Expression Omnibus (GEO)	Illumina Genome Analyzer IIx	19.2M spots, 2.9G bases, 1.9Gb	Next generation sequencing facilitates quantitative analysis of Caenorhabditis elegans N2 wild type, emr-1(gk119), lem-2(tm1582) and emr-1(RNAi) lem-2(tm1582) transcriptomes.
SRR765846	Gene Expression Omnibus (GEO)	Illumina Genome Analyzer IIx	23M spots, 3.5G bases, 2.3Gb	Next generation sequencing facilitates quantitative analysis of Caenorhabditis elegans N2 wild type, emr-1(gk119), lem-2(tm1582) and emr-1(RNAi) lem-2(tm1582) transcriptomes.
SRR765847	Gene Expression Omnibus (GEO)	Illumina Genome Analyzer IIx	23.7M spots, 3.6G bases, 2.4Gb	Next generation sequencing facilitates quantitative analysis of Caenorhabditis elegans N2 wild type, emr-1(gk119), lem-2(tm1582) and emr-1(RNAi) lem-2(tm1582) transcriptomes.
SRR765848	Gene Expression Omnibus (GEO)	Illumina Genome Analyzer IIx	26.2M spots, 4G bases, 2.7Gb	Next generation sequencing facilitates quantitative analysis of Caenorhabditis elegans N2 wild type, emr-1(gk119), lem-2(tm1582) and emr-1(RNAi) lem-2(tm1582) transcriptomes.
SRR953088	PEKING UNIVERSITY	Illumina HiSeq 2000	57.3M spots, 11.5G bases, 7.1Gb	Profiling of RNA editing in Caenorhabditis elegans
SRR953117	PEKING UNIVERSITY	Illumina HiSeq 2000	57.2M spots, 11.4G bases, 7.4Gb	Profiling of RNA editing in Caenorhabditis elegans
SRR953118	PEKING UNIVERSITY	Illumina HiSeq 2000	55.2M spots, 11G bases, 7Gb	Profiling of RNA editing in Caenorhabditis elegans
SRR953119	PEKING UNIVERSITY	Illumina HiSeq 2000	55.1M spots, 11G bases, 7Gb	Profiling of RNA editing in Caenorhabditis elegans
SRR953120	PEKING UNIVERSITY	Illumina HiSeq 2000	55.8M spots, 11.2G bases, 7Gb	Profiling of RNA editing in Caenorhabditis elegans
SRR953121	PEKING UNIVERSITY	Illumina HiSeq 2000	58.5M spots, 11.7G bases, 7.7Gb	Profiling of RNA editing in Caenorhabditis elegans
SRR953122	PEKING UNIVERSITY	Illumina HiSeq 2000	55.4M spots, 11.1G bases, 6.9Gb	Profiling of RNA editing in Caenorhabditis elegans
SRR953123	PEKING UNIVERSITY	Illumina HiSeq 2000	61.4M spots, 11G bases, 7.3Gb	Profiling of RNA editing in Caenorhabditis elegans
SRR953124	PEKING UNIVERSITY	Illumina HiSeq 2000	58.5M spots, 11.7G bases, 7.2Gb	Profiling of RNA editing in Caenorhabditis elegans
SRR953125	PEKING UNIVERSITY	Illumina HiSeq 2000	58.3M spots, 11.7G bases, 7.4Gb	Profiling of RNA editing in Caenorhabditis elegans
SRR953126	PEKING UNIVERSITY	Illumina HiSeq 2000	56.9M spots, 11.4G bases, 7Gb	Profiling of RNA editing in Caenorhabditis elegans
SRR953127	PEKING UNIVERSITY	Illumina HiSeq 2000	64.9M spots, 11.7G bases, 7.7Gb	Profiling of RNA editing in Caenorhabditis elegans
SRR953128	PEKING UNIVERSITY	Illumina HiSeq 2000	56M spots, 11.2G bases, 6.9Gb	Profiling of RNA editing in Caenorhabditis elegans
SRR953129	PEKING UNIVERSITY	Illumina HiSeq 2000	58.7M spots, 11.7G bases, 7.6Gb	Profiling of RNA editing in Caenorhabditis elegans
SRR953130	PEKING UNIVERSITY	Illumina HiSeq 2000	57.3M spots, 11.5G bases, 7Gb	Profiling of RNA editing in Caenorhabditis elegans
SRR953131	PEKING UNIVERSITY	Illumina HiSeq 2000	63M spots, 11.3G bases, 7.5Gb	Profiling of RNA editing in Caenorhabditis elegans
SRR953132	PEKING UNIVERSITY	Illumina HiSeq 2000	57.6M spots, 11.5G bases, 6.9Gb	Profiling of RNA editing in Caenorhabditis elegans
SRR953133	PEKING UNIVERSITY	Illumina HiSeq 2000	56.2M spots, 11.2G bases, 7.1Gb	Profiling of RNA editing in Caenorhabditis elegans
