# Supplementary material for: The C. elegans 3′ UTRome v2 resource for studying mRNA cleavage and polyadenylation, 3′-UTR biology, and miRNA targeting
Source: HighWire-hosted journal article supplement (doi:10.1101/gr.254839.119), 2019-11-19
Supplement: Supplemental_Table_S2.xlsx [file Supplemental_Table_S2.xlsx]

## Sheet: DNA Primers used in this study
Name	Primer
M03A1.3 _3'UTR_F	GGGGACAGCTTTCTTGTACAAAGTGGCTCTTCTTGTCGTCAATGGATATAAAAATGTATAA
M03A1.3 _3'UTR_R	GGGGACAACTTTGTATAATAAAGTTGGCATG TTTTCTATTAGTACCGCACCC
Y106G6H.9_3'UTR_F	GGGGACAGCTTTCTTGTACAAAGTGGC TGTTTGGAAAACGAATTGGTCTACTTCTTCATAA
Y106G6H.9_3'UTR_R	GGGGACAACTTTGTATAATAAAGTTGCCAGTGAAATTTGAACAAAAATTGG
ges-1 _3'UTR_F	GGGGACAGCTTTCTTGTACAAAGTGGCTCATTCGTCAAACAAGGACGAGCTGTA A
ges-1 _3'UTR_R	GGGGACAACTTTGTATAATAAAGTTGCTTATTGTC CACTTCCGGAGAGCC
M13F_seq	ACGTTGTAAAACGACGGCCAG
ges-1_mut1_F	TATACTTTTGCTTCTTTTCTT CGGCAAATG
ges-1_mut1_R	GCATTTGCCGAAGAAAAGAAGCAAAAGTATA
Y106G6H.9 _mut1_F	GAGAAAGTTTAATTTTTTCTAGTCTGG
Y106G6H.9 _mut1_R	CCAGACTAGAAAAAATTAAACTTTCTC
Y106G6H.9 _mut2_F	GTTTAATTTTTTCTGGTCTGGAAT TTT
Y106G6H.9 _mut2_R	AAAATTCCAGACCAGAAAAAATTAAAC
M03A1.3_mut1_F	GGGGACAG CTTTCTTGTACAAAGTGGCTCTTCTTGTCGTCAATGGATATAAAAATGTATAA
M03A1.3_mut1_R	GGGGACAACTTTGTATAATAAAGTTGGCATGTTTTCTATTA GTACCGCACCC
GFP_F	GGGGACA GCTTTCTTGTACAAAGTGGCTCATGGCAGACAAACAAAAGAATGG
GFP_seq	GGTCCTTCTTGA GTTTGTAACAGC
Poly-dT23_anchored_NV	GGGGACAACTTTGTATAATAAAGTTGTTTTTTTTTTTTTTTTTTTTTTTVN
