# Supplementary material for: The C. elegans 3′ UTRome v2 resource for studying mRNA cleavage and polyadenylation, 3′-UTR biology, and miRNA targeting
Source: HighWire-hosted journal article supplement (doi:10.1101/gr.254839.119), 2019-11-19
Supplement: Supplemental_Table_S3.xlsx [file Supplemental_Table_S3.xlsx]

## Sheet: miRanda (all)
gene name	miRNA lost
	name	score	energy
aakb-2	miR-2218a	153	-8.99
aat-6	miR-79	155	-14.38
aat-6	miR-4811	144	-9.48		Supplemental Table S3: miRNA targets lost or gained due to APA
acd-3	miR-789	150	-12.24
acd-3	miR-789	150	-12.62
acd-3	miR-789-2	155	-14.15
acd-3	miR-789-2	155	-14.53
acl-5	miR-85	151	-6.9
adt-2	miR-247	144	-10.5
adt-2	miR-259	149	-9.58
aly-1	miR-261	160	-7.68
aly-1	miR-261	160	-10.32
amx-3	miR-43	157	-11.48
amx-3	miR-2221	148	-10.97
anmt-1	miR-5547	153	-9.32
anoh-2	miR-239a	156	-11.27
anoh-2	miR-239b	152	-8.62
anoh-2	miR-253	157	-15.76
apc-11	miR-1021	157	-13.61
aqp-8	miR-4807	152	-11.57
arrd-8	miR-70	153	-11.66
arrd-8	miR-124	154	-16.85
arrd-8	miR-8186	140	-14.01
arrd-9	miR-70	150	-7.87
arrd-9	miR-73	147	-18.72
arrd-9	miR-74	140	-10.71
arrd-9	miR-76	140	-12.7
arrd-9	miR-78	157	-23.24
arrd-9	miR-250	142	-11.41
arrd-9	miR-5547	140	-4.84
asah-1	miR-2	141	-11.34
atg-9	miR-265	149	-22.8
atg-9	miR-4925	159	-9.99
B0024.4	miR-4924	157	-12.18
B0222.5	miR-2216	153	-11.57
B0222.5	miR-8198	141	-9.36
B0310.1b	miR-1820	140	-12.45
B0310.1b	miR-2209a	140	-9.21
B0310.1b	miR-2209c	140	-7.17
B0507.3a	miR-797	144	-9.64
B0507.3a	miR-797	144	-12.28
B0511.7	miR-8206	176	-12.35
best-21	miR-40	141	-10.96
best-21	miR-40	141	-11.46
bet-1	miR-1820	155	-14.23
bet-2	miR-36	141	-9.78
bet-2	miR-794	155	-14.45
bet-2	miR-794	140	-12.02
btb-16	miR-8190	157	-17.42
btb-19	miR-240	164	-12.11
C01C4.3b	miR-40	142	-13.17
C01C4.3b	miR-1021	155	-15.8
C01C4.3b	miR-1820	141	-7.96
C01C4.3b	miR-4815	147	-10.12
C01G12.3	miR-2221	153	-12.99
C01G5.9	miR-43	160	-12.2
C01H6.3	miR-355	146	-8.59
C01H6.3	miR-1020	160	-15.56
C01H6.6.2	miR-5551	147	-6.77
C02B10.5a.	miR-355	145	-6.41
C03C10.9	miR-789	145	-8.96
C03C10.9	miR-789-2	146	-9.31
C03C10.9	miR-2209a	140	-7.1
C03G6.17	miR-269	146	-13.06
C04C3.14	miR-4929	145	-14.59
C04F6.7	miR-256	149	-14.86
C04F6.7	miR-4925	152	-9.88
C05C9.3	miR-265	154	-23.01
C05C9.3	miR-787	140	-8.87
C05C9.3	miR-4808	141	-7.68
C05D11.13	miR-85	154	-8.56
C05D12.7	miR-268	147	-16.54
C06A5.6	miR-234	147	-13.53
C06A5.6	miR-245	150	-11.47
C06A5.6	miR-247	143	-7.31
C06A5.6	miR-256	146	-13.66
C06A5.6	miR-261	152	-14.72
C06A5.6	miR-1019	155	-18.17
C06A5.6	miR-1820	158	-12.69
C06A5.6	miR-2219	147	-14.41
C06A5.6	miR-4923a	143	-9.48
C06A5.6	miR-4932	153	-15.54
C06A5.6	miR-8186	145	-14.35
C06A5.6	miR-8209	157	-12.1
C06B8.2c.1	miR-789	140	-8.73
C06B8.2c.1	miR-789-2	140	-9
C06G1.5b	miR-267	141	-11.52
C07B5.4b.2	miR-789	143	-11.3
C07B5.4b.2	miR-789-2	143	-10.47
C07B5.4b.2	miR-2221	140	-8.13
C07D10.1	miR-239a	154	-16.77
C07D10.1	miR-239b	142	-7.08
C07E3.9	miR-5595	151	-10.66
C07E3.9	miR-8189	144	-9.7
C07E3.9	miR-8206	159	-12.42
C08B6.4b	miR-248	142	-13.22
C08B6.4b	miR-355	140	-6.79
C08B6.4b	miR-355	140	-6.6
C08B6.4b	miR-2208a	140	-11.74
C08B6.4b	miR-2208b	140	-12.51
C08F1.11	miR-67	141	-8.7
C08G5.6	miR-356a	140	-11.62
C08G5.6	miR-2216	145	-7.02
C08G5.6	miR-2216	145	-8.55
C08G5.6	miR-4809	157	-9.76
C09G9.1b	miR-5547	147	-7.13
C10A4.13	miR-49	141	-15.91
C10A4.13	miR-86	150	-13.56
C10A4.13	miR-124	156	-18.06
C10A4.13	miR-268	162	-14.36
C10A4.13	miR-355	140	-7.91
C10A4.13	miR-360	146	-17.05
C10A4.13	miR-4809	175	-18.28
C10A4.13	miR-4925	140	-11.25
C10A4.13	miR-4929	140	-11.12
C10A4.13	miR-5549	157	-12
C10A4.13	miR-356b	148	-13.77
C13C4.7	miR-43	159	-15.89
C13C4.7	miR-64	145	-15.17
C13C4.7	miR-65	148	-17.98
C13C4.7	miR-66	148	-13.3
C13C4.7	miR-229	178	-22.72
C13C4.7	miR-798	142	-10.39
C13C4.7	miR-4811	141	-10.75
C13C4.7	miR-5548	145	-15.03
C13C4.7	miR-8200	146	-20.75
C14C6.2a	miR-253	146	-11.24
C16D9.1	miR-4923a	151	-13.76
C17C3.15	miR-49	155	-12.69
C17C3.15	miR-1820	147	-11.81
C17C3.15	miR-2218a	153	-9.83
C17C3.15	miR-2218b	145	-11.24
C17C3.15	miR-2221	149	-17.91
C17C3.15	miR-4809	152	-12.3
C17C3.15	miR-4810a	149	-13.01
C17C3.15	miR-8186	149	-12.01
C17C3.15	miR-8212	156	-10.8
C17C3.5	miR-2	158	-13.93
C17C3.5	miR-72	146	-15.42
C17C3.5	miR-266	142	-12.84
C17C3.5	miR-787	153	-11.59
C17C3.5	miR-1832b	140	-13.19
C17C3.5	miR-4925	153	-6.44
C17C3.5	miR-8188	147	-12.15
C17H1.14	miR-2208a	141	-7.77
C17H1.14	miR-2208b	149	-10.35
C17H1.9	miR-786	158	-13.43
C17H1.9	miR-786	158	-13.31
C18D4.6d	miR-789	153	-11.17
C18D4.6d	miR-789-2	145	-12.49
C18E3.9b	miR-255	148	-6.75
C18H2.1	miR-256	140	-11.45
C18H2.1	miR-268	165	-19.17
C18H2.1	miR-58b	164	-20.37
C18H2.1	miR-2216	155	-14.22
C18H2.1	miR-4811	142	-8.68
C18H2.1	miR-4923a	152	-11.7
C18H2.1	miR-4935	147	-20.12
C18H2.1	miR-8194	140	-18.74
C18H2.1	miR-8201	163	-18.37
C18H2.1	miR-8202	149	-12.62
C18H2.1	miR-8209	168	-15.86
C18H2.1	miR-8211	141	-19.05
C18H9.3	miR-267	147	-21.01
C18H9.3	miR-2211	158	-15.62
C18H9.3	miR-8206	140	-6.53
C23G10.1b	miR-60	150	-16.11
C23G10.1b	miR-86	146	-11.71
C23G10.1b	miR-86	140	-10.02
C23G10.1b	miR-2220	155	-12.72
C23G10.1b	miR-4811	152	-8.96
C23G10.1b	miR-4920	145	-8.46
C23G10.1b	miR-4923a	145	-13.18
C23G10.5	miR-5549	155	-15.78
C27A12.9	miR-46	143	-12.81
C27A12.9	miR-47	151	-14.48
C27A12.9	miR-255	157	-8.89
C28C12.4	miR-8189	140	-10.6
C30B5.2a	miR-4811	154	-9.11
C30B5.2a	miR-5547	147	-10.52
C31E10.1	miR-4922	163	-10.58
C31E10.1	miR-5547	140	-4.99
C32A9.1	miR-1022	140	-12.53
C32A9.1	miR-1819	152	-10.42
C32B5.18	miR-255	167	-10.3
C32B5.6	miR-1021	156	-14.89
C32B5.6	miR-1021	156	-15.27
C32D5.1	miR-41	146	-13.93
C32D5.1	miR-4813	140	-12.96
C32D5.1	miR-5595	163	-15.07
C32E8.4.1	miR-46	144	-15.2
C32E8.4.1	miR-124	146	-13.42
C32E8.4.1	miR-272	156	-21.27
C32E8.4.1	miR-796	155	-16.76
C32E8.4.1	miR-4923a	150	-14.39
C33D9.6a	miR-36	162	-15.19
C33D9.6a	miR-83	153	-7.97
C33D9.6a	miR-261	159	-11.5
C33D9.6a	miR-355	146	-11.17
C33D9.6a	miR-355	140	-6.74
C33D9.6a	miR-800	149	-10.11
C33D9.6a	miR-1820	151	-14.7
C33D9.6a	miR-4925	147	-12.24
C33D9.6a	miR-5552	147	-12.36
C33D9.6a	miR-5595	154	-14.32
C33D9.6a	miR-5595	149	-13.94
C33D9.6a	miR-8195	144	-15.03
C33D9.6a	miR-8201	148	-18.24
C33D9.6a	miR-8209	171	-17.74
C33H5.13a	miR-83	161	-11.32
C33H5.13a	miR-251	148	-11.83
C33H5.13a	miR-252	155	-12.72
C34D1.4a	miR-2216	145	-9.38
C35B8.3a.2	miR-8203	152	-16.7
C35E7.3	let-7	146	-12.31
C35E7.3	miR-2	152	-8.34
C35E7.3	miR-46	143	-12.84
C35E7.3	miR-46	142	-11.7
C35E7.3	miR-47	150	-16.4
C35E7.3	miR-47	143	-13.53
C35E7.3	miR-48	147	-11.75
C35E7.3	miR-70	155	-6.22
C35E7.3	miR-84	163	-14.92
C35E7.3	miR-86	140	-7.05
C35E7.3	miR-228	147	-15.02
C35E7.3	miR-241	146	-15.88
C35E7.3	miR-246	140	-9.08
C35E7.3	miR-247	158	-13.37
C35E7.3	miR-247	153	-9.42
C35E7.3	miR-247	143	-8.82
C35E7.3	miR-254	145	-17.39
C35E7.3	miR-255	148	-9.15
C35E7.3	miR-265	157	-21.01
C35E7.3	miR-272	168	-22.77
C35E7.3	lsy-6	142	-12.2
C35E7.3	miR-785	145	-13.36
C35E7.3	miR-795	151	-16.78
C35E7.3	miR-1820	166	-12.69
C35E7.3	miR-1828	162	-18.99
C35E7.3	miR-2216	149	-13.22
C35E7.3	miR-2219	154	-17.48
C35E7.3	miR-2953	155	-14.92
C35E7.3	miR-4815	155	-18.54
C35E7.3	miR-4923a	145	-10.16
C35E7.3	miR-4923a	145	-11.88
C35E7.3	miR-4923a	140	-11.49
C35E7.3	miR-5547	154	-9.88
C35E7.3	miR-5549	145	-14.11
C35E7.3	miR-8200	145	-12.96
C35E7.3	miR-8206	163	-4.74
C35E7.3	miR-8209	155	-10.92
C35E7.3	miR-8212	156	-11.05
C37A5.7.2	miR-8206	161	-8.52
C39H7.4	miR-41	142	-9.31
C39H7.4	miR-60	142	-13.53
C39H7.4	miR-79	149	-18.8
C39H7.4	miR-238	148	-17.28
C39H7.4	miR-244	145	-12.86
C39H7.4	miR-790	155	-16.63
C39H7.4	miR-1828	153	-15.95
C39H7.4	miR-2208a	146	-14.98
C39H7.4	miR-2208b	146	-17.56
C39H7.4	miR-2216	140	-10.17
C39H7.4	miR-4925	154	-11.88
C39H7.4	miR-4927	150	-13.29
C39H7.4	miR-4929	151	-17.8
C42C1.9a	miR-8202	140	-10.96
C42D8.1	miR-247	151	-10.5
C42D8.1	miR-4923a	141	-9.85
C44H4.6	miR-247	151	-7.58
C44H4.6	miR-1820	163	-11.34
C44H4.6	miR-4923a	153	-13.57
C45B11.5	miR-43	147	-9.9
C45B11.5	miR-44	155	-15.22
C45B11.5	miR-45	147	-11.65
C45B11.5	miR-60	141	-13.08
C45B11.5	miR-238	159	-18.16
C45B11.5	miR-789	143	-10.09
C45B11.5	miR-789-2	140	-10.17
C45B11.5	miR-2211	172	-23.71
C45B11.5	miR-2217a	143	-15.59
C45B11.5	miR-2218a	180	-19.35
C45B11.5	miR-4807	151	-14.15
C45B11.5	miR-4814	140	-13.42
C45B11.5	miR-4923a	147	-10.98
C45B11.5	miR-4936	149	-18.53
C45B11.5	miR-5549	149	-8.63
C45B11.5	miR-2217b	143	-14.55
C45B11.5	miR-8211	154	-25.03
C47B2.2.2	miR-259	157	-15.4
C47B2.2.2	miR-4814	140	-14.03
C48B6.3	miR-240	154	-14.95
C48B6.3	miR-4923a	150	-11.02
C48D1.9a	miR-41	152	-12.21
C48D1.9a	miR-61	142	-15.97
C48D1.9a	miR-70	145	-4.63
C48D1.9a	miR-86	149	-11.3
C48D1.9a	miR-253	147	-7.04
C48D1.9a	miR-253	143	-7.87
C48D1.9a	miR-259	154	-20.81
C48D1.9a	miR-355	150	-14.22
C48D1.9a	miR-784	159	-17.05
C48D1.9a	miR-789	140	-9.98
C48D1.9a	miR-789-2	140	-10.25
C48D1.9a	miR-1019	143	-12.26
C48D1.9a	miR-2216	152	-14.56
C48D1.9a	miR-2221	149	-8.69
C48D1.9a	miR-4920	154	-11.6
C48D1.9a	miR-5551	156	-15.01
C48D1.9a	miR-5552	151	-12.26
C48D1.9a	miR-8209	158	-10.61
C48D1.9a	miR-8211	149	-21.37
C48D5.3	miR-8206	147	-5.14
C49A9.2	miR-261	148	-8.45
C49G7.7	miR-49	151	-11.29
C49G7.7	miR-231	143	-12.06
C49G7.7	miR-255	145	-7.39
C49G7.7	miR-259	153	-16.37
C49G7.7	miR-2216	143	-10.72
C49G7.7	miR-2218a	154	-9.51
C49G7.7	miR-2221	145	-7.98
C49G7.7	miR-2221	145	-8.21
C49G7.7	miR-4922	143	-9.16
C49G7.7	miR-4925	155	-9.74
C49G7.7	miR-5547	144	-8.87
C49G7.7	miR-5549	145	-11.72
C49G7.7	miR-5594	160	-12.94
C49G7.7	miR-8210	151	-21.1
C49H3.12a	miR-46	141	-15.84
C49H3.12a	miR-268	149	-13.49
C49H3.12a	miR-1820	140	-9.37
C49H3.12a	miR-2207	140	-10.32
C49H3.12a	miR-356b	160	-22.06
C49H3.12a	miR-8194	152	-16.28
C54F6.15	miR-49	157	-16.65
C54F6.15	miR-253	140	-6.18
C54F6.15	miR-799	147	-19.91
C54F6.15	miR-1820	159	-7.18
C54F6.15	miR-4811	156	-12.94
C54F6.15	miR-4923a	140	-10.92
C54F6.15	miR-4937	151	-18.28
C54F6.15	miR-5547	151	-5.07
C54F6.15	miR-5547	141	-5.07
C54F6.15	miR-5547	140	-5.74
C54F6.15	miR-5549	149	-9.78
C54F6.15	miR-8203	151	-16.05
cal-6	miR-34	145	-18.94
cal-6	miR-1824	140	-11.51
cal-6	miR-4927	151	-12.66
cal-6	miR-4933	140	-13.48
cap-2	miR-43	153	-12.59
cap-2	miR-8203	155	-17.86
cdc-25.3	miR-5547	147	-5.07
cec-10	miR-58b	145	-13.14
ceh-20	miR-40	148	-15.37
ceh-20	miR-43	155	-14.83
ceh-20	miR-44	140	-11.06
ceh-20	miR-45	140	-9.7
ceh-20	miR-46	152	-17.54
ceh-20	miR-60	145	-15.29
ceh-20	miR-85	158	-7.68
ceh-20	miR-253	140	-5.87
ceh-20	miR-267	156	-18.24
ceh-20	miR-1019	155	-16.23
ceh-20	miR-1020	153	-13.93
ceh-20	miR-1828	145	-18.08
ceh-20	miR-1829c	149	-15.25
ceh-20	miR-2208a	146	-12.27
ceh-20	miR-2208b	143	-12.51
ceh-20	miR-8195	142	-13.63
ceh-20	miR-8203	145	-11.55
ceh-21	miR-36	163	-25.1
ceh-21	miR-248	151	-15.84
ceh-21	miR-259	140	-9.57
ceh-21	miR-2216	148	-12.29
ceh-21	miR-4806	146	-17.12
ceh-21	miR-4810a	151	-16.01
ceh-21	miR-5593	144	-15.33
ceh-21	miR-5594	151	-12.54
ceh-21	miR-356b	140	-16.2
ceh-21	miR-8209	161	-12.58
cex-1	miR-83	162	-13.63
cfi-1	miR-790	143	-15.29
chil-27	miR-5547	151	-8.87
cle-1	miR-43	157	-12.95
clec-102	miR-1018	141	-13
clec-102	miR-4925	147	-11.35
clec-143	miR-43	151	-16.32
clec-143	miR-259	158	-11.73
clec-143	miR-2218b	143	-8.84
clec-143	miR-5547	157	-12.72
clec-182	miR-236	154	-11.51
clec-182	miR-798	152	-15.14
clec-182	miR-8212	144	-9.64
clec-53	miR-41	147	-20.75
clec-53	miR-67	142	-16.99
clec-53	miR-250	140	-15.48
clec-53	miR-4814	152	-12.9
clec-53	miR-8187	141	-18.29
clec-53	miR-8200	140	-12.68
clec-7	miR-355	140	-6.6
clec-73	miR-255	155	-7.36
clec-73	miR-4811	154	-11.3
cln-3.1	miR-1	156	-15.9
cln-3.1	miR-41	146	-13.59
cln-3.1	miR-54	140	-11.96
cln-3.1	miR-60	141	-10.77
cln-3.1	miR-83	153	-10.71
cln-3.1	miR-242	143	-13.6
cln-3.1	miR-254	146	-12.43
cln-3.1	miR-255	154	-12.82
cln-3.1	miR-255	140	-6.86
cln-3.1	miR-356a	151	-8.73
cln-3.1	miR-784	147	-16.35
cln-3.1	miR-786	157	-12.37
cln-3.1	miR-790	145	-15.67
cln-3.1	miR-1820	150	-12.28
cln-3.1	miR-1820	148	-11.38
cln-3.1	miR-1833	140	-13.62
cln-3.1	miR-2953	157	-19.62
cln-3.1	miR-4813	160	-13.79
cln-3.1	miR-4938	148	-13.91
cln-3.1	miR-4938	142	-7.71
cln-3.1	miR-5547	142	-5.07
cln-3.1	miR-5552	161	-18.62
cln-3.1	miR-8192	141	-13.62
clp-6	miR-2218a	160	-10.57
clp-6	miR-8208	151	-23.14
cnp-3	miR-86	143	-12.91
cnp-3	miR-5547	140	-5.07
cnp-3	miR-5549	169	-17.82
cnp-3	miR-8202	155	-12.57
col-113	miR-1822	148	-15.86
col-147	miR-41	145	-11.31
col-147	miR-44	148	-16.71
col-147	miR-45	145	-12.94
col-147	miR-60	146	-12.98
col-147	miR-81	145	-16.78
col-147	miR-82	140	-16.06
col-147	miR-85	150	-11.11
col-147	miR-86	143	-10.4
col-147	miR-247	153	-10.2
col-147	miR-255	146	-8.49
col-147	miR-259	150	-12.49
col-147	miR-1829c	141	-11.75
col-147	miR-2208a	143	-10.47
col-147	miR-2208b	143	-10.77
col-147	miR-4923a	144	-8.92
col-147	miR-5547	142	-5.17
col-147	miR-356b	147	-17.68
col-147	miR-8206	143	-5.99
col-147	miR-8209	146	-8.61
col-161	miR-71	154	-19.21
col-161	miR-255	159	-10.6
col-161	miR-355	142	-7.87
col-161	miR-792	153	-14.98
col-161	miR-1018	146	-13.5
col-161	miR-1021	145	-12.43
col-161	miR-1021	145	-10.36
col-161	miR-1820	162	-11.91
col-161	miR-2216	156	-15.18
col-161	miR-4921	152	-16.34
col-161	miR-4925	154	-11.33
col-161	miR-5547	157	-9.17
col-161	miR-5547	146	-10.5
col-161	miR-8198	151	-14.3
col-173	miR-43	151	-8.12
col-173	miR-49	145	-11.02
col-173	miR-253	147	-6.12
col-173	miR-355	150	-11.97
col-173	miR-355	141	-12.03
col-173	miR-1021	147	-13.43
col-173	miR-4925	152	-6.63
col-173	miR-8198	158	-13.18
col-177	miR-86	140	-9.22
col-177	miR-124	154	-17.78
col-177	miR-1822	145	-15.08
col-177	miR-2208a	151	-10.21
col-177	miR-2208b	159	-13.68
col-177	miR-2209a	149	-11.91
col-177	miR-2209c	140	-9.13
col-177	miR-4922	161	-14.52
col-177	miR-4929	148	-12.96
col-177	miR-5547	142	-9.85
col-177	miR-8202	168	-18.64
col-186	miR-789	145	-9.46
col-186	miR-789-2	151	-18.98
col-34	miR-38	146	-19.97
col-34	miR-43	140	-10.51
col-34	miR-64	146	-18.06
col-34	miR-65	148	-18.01
col-34	miR-66	156	-16.27
col-34	miR-83	148	-12.65
col-34	miR-86	151	-12.14
col-34	miR-229	154	-15.83
col-34	miR-247	156	-12.92
col-34	miR-259	150	-16.24
col-34	miR-261	155	-14.34
col-34	miR-267	152	-19
col-34	miR-269	140	-12.89
col-34	miR-791	155	-11.21
col-34	miR-792	160	-16.61
col-34	miR-1822	146	-14.49
col-34	miR-1829c	151	-14.07
col-34	miR-2218a	163	-16.63
col-34	miR-5545	145	-14.88
col-34	miR-5547	147	-9.01
col-34	miR-8197	142	-11.21
col-34	miR-8197	140	-11.97
col-34	miR-8201	153	-18.31
col-34	miR-8206	149	-4.86
copd-1	miR-355	140	-5.01
cpd-1	miR-43	162	-16.37
cpd-1	miR-4922	156	-14.07
crh-1	miR-50	160	-18.92
crh-1	miR-62	152	-6.65
crn-1	miR-355	150	-9.26
crn-1	miR-4936	150	-12.29
ctbp-1	miR-793	165	-22.18
ctbp-1	miR-5549	148	-11.76
ctl-3	miR-1820	159	-9.3
ctps-1	miR-8209	145	-11.63
cul-3	miR-8204	145	-11.67
cutl-18	miR-1820	170	-11.02
cya-1	miR-787	151	-8.4
cya-1	miR-8197	142	-9.81
cyh-1	miR-85	145	-8.14
cyp-14A3	miR-46	160	-14.82
cyp-14A3	miR-72	160	-14.49
cyp-14A3	miR-72	147	-18.41
cyp-14A3	miR-236	161	-19.55
cyp-14A3	miR-266	156	-12.82
cyp-14A3	miR-266	140	-12.8
cyp-14A3	miR-786	160	-15.41
cyp-14A3	miR-794	146	-14.38
cyp-14A3	miR-796	153	-18.56
cyp-14A3	miR-1819	146	-10.23
cyp-14A3	miR-1820	164	-11.25
cyp-14A3	miR-1829b	152	-13.7
cyp-14A3	miR-2217a	156	-17.77
cyp-14A3	miR-8188	153	-16.72
cyp-14A3	miR-8188	148	-16.6
cyp-14A3	miR-8190	150	-12.19
cyp-14A3	miR-8195	145	-18.61
cyp-14A3	miR-8200	145	-13.55
cyp-14A3	miR-4810b	160	-15.8
cyp-14A3	miR-2217b	157	-17.69
cyp-34A9	miR-4810b	149	-17.02
D1005.2	miR-253	140	-5.62
D1005.2	miR-2211	157	-19.19
D1007.3	miR-37	147	-19.02
D1007.3	miR-42	140	-19.42
D1007.3	miR-251	156	-12.55
D1007.3	miR-252	153	-16.86
D1007.3	miR-355	142	-6.6
D1007.3	miR-797	142	-14.69
D1007.3	miR-800	142	-11.08
D1007.3	miR-4808	152	-9.01
D1007.3	miR-4814	158	-15.38
D1007.3	miR-4816	145	-14.77
D1007.3	miR-5547	146	-4.98
D1007.3	miR-8197	140	-7.48
D1007.3	miR-4810b	152	-13.78
D1007.3	miR-8196b	145	-11.22
D1025.1	miR-355	145	-6.91
D1086.19	miR-245	145	-7.9
D1086.19	miR-355	155	-9.34
D1086.19	miR-355	145	-7.91
D1086.19	miR-790	140	-15.54
D1086.19	miR-1820	153	-9.61
D1086.2a	lin-4	140	-14.6
D1086.2a	miR-237	151	-16.94
D1086.2a	miR-272	150	-17.28
D1086.2a	miR-355	140	-7.22
D1086.2a	miR-787	151	-13.24
D1086.2a	miR-789	144	-11.65
D1086.2a	miR-789-2	140	-16.18
D1086.2a	miR-790	159	-16.51
D1086.2a	miR-2208a	140	-9.63
D1086.2a	miR-2208b	140	-10.75
dapk-1	miR-240	147	-10.69
deg-1	miR-1820	152	-12.73
deg-1	miR-5549	166	-18.73
deg-3	miR-2	142	-7.38
deg-3	miR-40	161	-21.01
deg-3	miR-44	141	-13.97
deg-3	miR-45	144	-14.04
deg-3	miR-46	142	-18.28
deg-3	miR-50	153	-13.17
deg-3	miR-50	149	-18.6
deg-3	miR-61	146	-18.98
deg-3	miR-62	160	-13.8
deg-3	miR-62	142	-11.98
deg-3	miR-261	144	-7.97
deg-3	miR-355	154	-13.73
deg-3	miR-355	140	-6.69
deg-3	miR-358	162	-25.17
deg-3	miR-784	143	-16.77
deg-3	miR-787	146	-10.18
deg-3	miR-794	154	-13.51
deg-3	miR-796	149	-12.39
deg-3	miR-1018	144	-14.57
deg-3	miR-2213	154	-21.08
deg-3	miR-4814	148	-12.13
deg-3	miR-4814	144	-13.52
deg-3	miR-4923a	145	-12.63
deg-3	miR-4935	140	-20.3
deg-3	miR-5551	156	-18.64
deg-3	miR-8203	152	-17.22
deg-3	miR-2217b-1	149	-19.91
dgk-4	miR-60	145	-15.14
dhs-16	miR-355	146	-6.63
dnj-27	miR-4808	150	-8.41
dnj-29	miR-2221	140	-6.34
dph-1	miR-255	150	-8.03
dpy-23	miR-5547	146	-8.14
dsl-1	miR-1	151	-16.55
dsl-1	miR-55	141	-12.38
dsl-1	miR-72	147	-17.32
dsl-1	miR-87	146	-11.6
dsl-1	miR-244	158	-19.46
dsl-1	miR-251	147	-13.56
dsl-1	miR-252	147	-17.77
dsl-1	miR-266	142	-11.64
dsl-1	miR-354	150	-26.36
dsl-1	miR-355	141	-6.86
dsl-1	miR-392	145	-17.22
dsl-1	miR-790	147	-16.97
dsl-1	miR-792	145	-16.56
dsl-1	miR-799	140	-13.9
dsl-1	miR-1019	154	-11.27
dsl-1	miR-1820	154	-8.94
dsl-1	miR-1820	140	-10.45
dsl-1	miR-1828	152	-15.18
dsl-1	miR-2207	149	-10.05
dsl-1	miR-2216	157	-16.89
dsl-1	miR-4805	151	-25
dsl-1	miR-4922	159	-8.68
dsl-1	miR-5548	151	-18.5
dsl-1	miR-8188	145	-15.33
dsl-1	miR-8190	157	-21.56
dsl-1	miR-4810b	147	-16.06
dsl-1	miR-8206	159	-4.6
dur-1	miR-239a	152	-12.3
dur-1	miR-239b	152	-12.9
dur-1	miR-357	147	-10.54
dve-1	miR-72	152	-16.58
dve-1	miR-247	173	-17.37
dve-1	miR-247	140	-8.2
dve-1	miR-266	145	-12.45
dve-1	miR-797	159	-19.12
dve-1	miR-1832a	142	-8.39
dve-1	miR-4923a	140	-8.7
dve-1	miR-8188	145	-12.68
dve-1	miR-8190	158	-13.36
dyf-17	miR-4925	147	-9.21
dyf-3	miR-60	148	-11.87
dyf-3	miR-77	152	-15.23
dyf-3	miR-81	143	-7.98
dyf-3	miR-82	151	-13.33
dyf-3	miR-85	152	-15.37
dyf-3	miR-249	143	-19.97
dyf-3	miR-253	147	-6.12
dyf-3	miR-355	142	-6.74
dyf-3	miR-355	140	-6.6
dyf-3	miR-4925	145	-8.72
dyf-3	miR-4927	176	-15.42
dyf-3	miR-5547	140	-5.63
dyf-3	miR-5552	162	-14.76
dyf-3	miR-5552	143	-11.85
dyf-3	miR-8189	147	-15.96
dyf-3	miR-8200	150	-25.04
E02H4.2	miR-55	147	-14.64
E02H4.2	miR-85	147	-9.6
E02H4.2	miR-86	156	-12.16
E02H4.2	miR-355	147	-7.64
E02H4.2	miR-2207	140	-11.84
E02H4.2	miR-2216	163	-13.96
E02H4.2	miR-4810a	151	-11.11
E02H9.7.1	miR-1	147	-14.63
E02H9.7.1	miR-70	164	-8.18
E02H9.7.1	miR-78	157	-23.71
E02H9.7.1	miR-80	153	-14.1
E02H9.7.1	miR-240	142	-12.11
E02H9.7.1	miR-248	147	-13.95
E02H9.7.1	miR-255	140	-7.12
E02H9.7.1	miR-357	154	-16.83
E02H9.7.1	miR-786	157	-16.41
E02H9.7.1	miR-1820	169	-15.28
E02H9.7.1	miR-1820	151	-12.95
E02H9.7.1	miR-1832a	146	-11.9
E02H9.7.1	miR-1832a	145	-18.93
E02H9.7.1	miR-2218b	140	-8.14
E02H9.7.1	miR-4926	140	-14.59
E02H9.7.1	miR-5546	159	-20.18
E02H9.7.1	miR-5547	158	-14.12
E02H9.7.1	miR-5547	144	-6.74
E02H9.7.1	miR-5595	154	-10.17
E02H9.7.1	miR-5595	140	-9.07
E02H9.7.1	miR-8187	140	-14.65
E02H9.7.1	miR-8197	140	-7.47
eat-20	miR-355	143	-6.94
eat-20	miR-4809	147	-9.24
eat-20	miR-4922	163	-9.01
eat-20	miR-5549	153	-6.49
eef-1G	miR-2221	159	-16.44
eef-1G	miR-8206	156	-4.13
efsc-1	miR-70	151	-4.55
efsc-1	miR-74	148	-11.98
efsc-1	miR-76	146	-14.85
efsc-1	miR-79	155	-12.11
efsc-1	miR-85	151	-11.29
efsc-1	miR-86	142	-7.49
efsc-1	miR-90	152	-17.56
efsc-1	miR-253	140	-10.46
efsc-1	miR-255	141	-6.97
efsc-1	miR-261	154	-12.83
efsc-1	miR-269	157	-11.82
efsc-1	miR-270	147	-16.25
efsc-1	miR-800	150	-14.06
efsc-1	miR-800	145	-12.84
efsc-1	miR-1019	164	-19.01
efsc-1	miR-1021	162	-19.43
efsc-1	miR-2209a	140	-6.67
efsc-1	miR-2218a	171	-20.8
efsc-1	miR-2218a	166	-14.15
efsc-1	miR-2218a	147	-17.02
efsc-1	miR-2218b	180	-27.24
efsc-1	miR-2218b	175	-23.63
efsc-1	miR-2219	148	-12.25
efsc-1	miR-4923b	141	-15.87
efsc-1	miR-5552	171	-27.2
efsc-1	miR-8190	145	-17.52
efsc-1	miR-8205	158	-21.56
EGAP2.2	miR-240	157	-10.58
EGAP2.2	miR-8206	148	-5.72
egl-43	miR-784	146	-16.38
egl-43	miR-790	146	-21.32
egl-43	miR-8203	142	-9.15
elt-6	miR-270	142	-8.36
elt-6	miR-270	142	-10.17
emre-1	miR-8186	140	-13.18
end-1	miR-247	145	-12.14
enu-3.1	miR-83	154	-10.48
enu-3.1	miR-239a	158	-11.25
enu-3.1	miR-239b	150	-9.4
enu-3.1	miR-247	144	-7.37
enu-3.1	miR-4922	143	-7.15
enu-3.1	miR-4923a	145	-11.45
enu-3.1	miR-4923a	165	-14.85
enu-3.1	miR-8194	170	-23.94
enu-3.1	miR-8206	152	-7.58
enu-3.6	miR-83	156	-14.88
enu-3.6	miR-247	144	-7.37
enu-3.6	miR-273	141	-17.18
enu-3.6	miR-4923a	145	-11.45
enu-3.6	miR-8194	170	-23.94
enu-3.6	miR-8203	142	-14.62
enu-3.6	miR-8206	152	-7.58
era-1	miR-268	142	-7.96
esyt-2	miR-355	140	-5.32
ets-7	miR-61	143	-13.78
exp-2	miR-50	146	-11.6
exp-2	miR-62	160	-18.63
exp-2	miR-81	140	-7.93
exp-2	miR-82	151	-12.18
exp-2	miR-247	145	-10.12
exp-2	miR-253	145	-6.96
exp-2	miR-1018	146	-11.63
exp-2	miR-1021	143	-11.89
exp-2	miR-2217a	146	-18.29
exp-2	miR-8190	148	-11.97
exp-2	miR-2217b	147	-16.43
F07C3.2	miR-49	146	-11.22
F07C3.2	miR-77	150	-15.36
F07C3.2	miR-85	155	-12.17
F07C3.2	miR-231	142	-8.55
F07C3.2	miR-238	151	-11.48
F07C3.2	miR-247	147	-9.07
F07C3.2	miR-247	140	-8.98
F07C3.2	miR-253	145	-8.84
F07C3.2	miR-355	140	-9.08
F07C3.2	miR-355	140	-5.01
F07C3.2	miR-789	159	-12.2
F07C3.2	miR-789-2	151	-18.23
F07C3.2	miR-1817	145	-12.06
F07C3.2	miR-1829c	144	-13.03
F07C3.2	miR-1830	157	-16.33
F07C3.2	miR-1832a	154	-14.61
F07C3.2	miR-2218a	157	-12.29
F07C3.2	miR-2219	140	-11.44
F07C3.2	miR-4808	140	-11.65
F07C3.2	miR-4811	152	-9.22
F07C3.2	miR-4923a	149	-9.11
F07C3.2	miR-5547	158	-9.49
F07C3.2	miR-8190	159	-12.06
F07C3.2	miR-8207	140	-12.1
F07C6.3	miR-78	146	-19.54
F07C6.3	miR-79	155	-16.62
F07C6.3	miR-249	149	-14.9
F07C6.3	miR-253	159	-16.02
F07C6.3	miR-1820	149	-13.1
F07C6.3	miR-2216	151	-13.52
F07C6.3	miR-2221	140	-6.34
F07C6.3	miR-4924	159	-11.6
F07C6.3	miR-4930	143	-15.34
F07C6.3	miR-4938	156	-14.22
F07C6.3	miR-5552	146	-13.68
F07C6.3	miR-8186	143	-14.73
F07C6.3	miR-8206	167	-11.07
F08H9.4b	miR-255	149	-8.27
F08H9.4b	miR-259	152	-14.13
F08H9.4b	miR-265	144	-21.23
F08H9.4b	miR-2216	141	-12.78
F08H9.4b	miR-4814	149	-17.49
F08H9.4b	miR-4937	142	-20.32
F08H9.4b	miR-5550	167	-21.61
F08H9.4b	miR-8186	143	-14.69
F08H9.4b	miR-8208	152	-18.96
F08H9.4b	miR-8210	149	-21.17
F09B9.4	miR-8206	150	-7.84
F09B9.4	miR-8206	146	-4.68
F09B9.4	miR-8209	161	-11.86
F09C6.11a	miR-247	146	-9.17
F09C6.11a	miR-4923a	148	-8.21
F09C8.1	miR-233	146	-20.25
F09C8.1	miR-255	148	-7.92
F09C8.1	miR-790	151	-16.25
F09C8.1	miR-2218a	161	-15.08
F09C8.1	miR-4925	155	-7.78
F09C8.1	miR-4925	140	-7.13
F09C8.1	miR-5594	168	-13.33
F09C8.1	miR-8208	149	-20.57
F09C8.1	miR-8212	157	-11.99
F09E10.7c	miR-46	148	-21.49
F09E10.7c	miR-247	140	-9.45
F09E10.7c	miR-4923a	162	-23.91
F09E10.7c	miR-4923a	156	-14.52
F09E10.7c	miR-4929	161	-21.34
F09E5.16	miR-261	145	-6.74
F09G2.8a	miR-1820	147	-9.57
F09G2.8a	miR-8204	140	-11.27
F10C2.3	miR-43	159	-13.62
F10C2.3	miR-800	146	-10.3
F10C2.3	miR-4937	153	-25.02
F10D7.3	miR-244	155	-15.17
F10D7.3	miR-244	153	-15.6
F10D7.3	miR-247	152	-8.95
F10D7.3	miR-253	143	-10.58
F10D7.3	miR-255	165	-12.54
F10D7.3	miR-267	149	-24.9
F10D7.3	miR-269	149	-12.15
F10D7.3	miR-355	159	-6
F10D7.3	miR-355	148	-14.58
F10D7.3	miR-800	151	-12.55
F10D7.3	miR-1822	167	-25.42
F10D7.3	miR-1829c	140	-13.92
F10D7.3	miR-4922	140	-4.42
F10D7.3	miR-4923a	148	-12.11
F10D7.3	miR-4926	152	-14.47
F10D7.3	miR-4927	155	-14.32
F10D7.3	miR-5549	169	-14.72
F10D7.3	miR-5549	151	-11.17
F10D7.3	miR-8186	159	-18.81
F10D7.3	miR-8210	140	-10.19
F10E7.1	miR-38	157	-18.11
F10E7.1	miR-40	172	-25.22
F10E7.1	miR-44	168	-21.42
F10E7.1	miR-44	164	-25.08
F10E7.1	miR-44	155	-18.61
F10E7.1	miR-45	160	-16.73
F10E7.1	miR-45	159	-18.73
F10E7.1	miR-45	156	-19.44
F10E7.1	miR-51	142	-12.96
F10E7.1	miR-52	158	-22.31
F10E7.1	miR-53	159	-22.31
F10E7.1	miR-54	154	-22.65
F10E7.1	miR-71	153	-15.63
F10E7.1	miR-73	148	-19.23
F10E7.1	miR-79	148	-9.8
F10E7.1	miR-85	162	-7.97
F10E7.1	miR-86	143	-14.94
F10E7.1	miR-236	160	-16.63
F10E7.1	miR-243	145	-17.58
F10E7.1	miR-255	158	-9.36
F10E7.1	miR-273	142	-18.29
F10E7.1	miR-789	155	-21.64
F10E7.1	miR-789-2	150	-15.25
F10E7.1	miR-1820	155	-7.27
F10E7.1	miR-1829c	153	-20.53
F10E7.1	miR-1830	142	-12.66
F10E7.1	miR-2207	141	-10.14
F10E7.1	miR-2218a	171	-23.21
F10E7.1	miR-2221	145	-13.06
F10E7.1	miR-4807	140	-10.09
F10E7.1	miR-4938	145	-11.88
F10E7.1	miR-4938	144	-20.24
F10E7.1	miR-5545	153	-16.53
F10E7.1	miR-5549	146	-6.06
F10E7.1	miR-8204	140	-12.69
F10E7.9	miR-5549	151	-9.61
F10E7.9	miR-8206	152	-4.68
F11A5.13	miR-70	140	-6.52
F11A5.13	miR-77	142	-11.5
F11A5.13	miR-249	151	-24.38
F11A5.13	miR-255	159	-10.51
F11A5.13	miR-255	145	-11.27
F11A5.13	miR-355	150	-8.33
F11A5.13	miR-791	150	-12.64
F11A5.13	miR-798	146	-12.58
F11A5.13	miR-800	142	-13.92
F11A5.13	miR-1829c	149	-13.66
F11A5.13	miR-4922	159	-12.51
F11A5.13	miR-4925	156	-12.14
F11A5.13	miR-4934	142	-17.87
F11A5.13	miR-4935	151	-26.15
F11A5.13	miR-5547	145	-9.85
F11A5.13	miR-5593	170	-22.59
F11A5.13	miR-8202	142	-9.69
F11A5.18	miR-2216	140	-8.56
F11A5.18	miR-2216	140	-10.03
F11F1.8	miR-43	146	-17.26
F11F1.8	miR-81	154	-23.52
F11F1.8	miR-82	153	-21.49
F11F1.8	miR-86	140	-10.45
F11F1.8	miR-247	147	-9.33
F11F1.8	miR-259	147	-13.9
F11F1.8	miR-259	147	-13.32
F11F1.8	miR-270	143	-16.85
F11F1.8	miR-354	141	-20.3
F11F1.8	lsy-6	144	-9.39
F11F1.8	miR-789	144	-12.12
F11F1.8	miR-789-2	142	-10.97
F11F1.8	miR-792	155	-14.11
F11F1.8	miR-793	141	-11.49
F11F1.8	miR-1820	159	-15.52
F11F1.8	miR-1832b	147	-16.45
F11F1.8	miR-4938	165	-19.45
F11F1.8	miR-5549	155	-11.81
F11F1.8	miR-5549	147	-8.95
F11F1.8	miR-5593	148	-19.24
F11F1.8	miR-8202	142	-10.83
F11F1.8	miR-8209	155	-12.43
F13A2.10	miR-41	154	-14.83
F13A2.10	miR-44	148	-15.1
F13A2.10	miR-45	148	-13.49
F13A2.10	miR-63	145	-14.04
F13A2.10	miR-255	147	-7.15
F13A2.10	miR-789	147	-13.49
F13A2.10	miR-789-2	151	-17.88
F13A2.10	miR-794	146	-12.22
F13A2.10	miR-1820	163	-9.19
F13A2.10	miR-4805	152	-16.94
F13A2.10	miR-4925	155	-9.74
F13A2.10	miR-5551	163	-15.43
F13A2.10	miR-356b	144	-13.92
F13A2.10	miR-8205	141	-16.66
F13A2.10	miR-8207	160	-23.35
F14F7.4	miR-272	152	-20.54
F14H12.3	miR-8212	157	-12.55
F18E3.11	miR-2207	146	-10.37
F19B10.13	miR-355	147	-13.16
F19B10.13	miR-2216	141	-11.47
F19B2.6	miR-51	144	-16.16
F19B2.6	miR-52	150	-14.97
F19B2.6	miR-53	158	-17.57
F19B2.6	miR-251	141	-10.28
F19B2.6	miR-252	152	-9.59
F19B2.6	miR-1019	157	-16.82
F19B2.6	miR-4811	147	-8.75
F19C6.3	miR-790	150	-19.25
F19C6.3	miR-1020	145	-12.5
F19C6.3	miR-1829c	162	-14.93
F19C6.3	miR-2207	166	-13.82
F21D9.4c	miR-253	140	-5.97
F21D9.4c	miR-2207	146	-13.16
F21D9.4c	miR-4925	148	-12.85
F21G4.5	miR-36	153	-15.62
F21G4.5	miR-253	140	-5.96
F21G4.5	miR-259	155	-14.77
F21G4.5	miR-786	165	-17.54
F21G4.5	miR-2216	166	-15.78
F22B5.5	miR-8206	147	-11.56
F22D3.4	miR-41	146	-17.86
F22D3.4	miR-253	140	-5.08
F22D3.4	miR-355	151	-10.93
F22D3.4	miR-58b	146	-12.94
F22D3.4	miR-4811	144	-5.6
F22D3.4	miR-4922	140	-5.21
F22H10.2	miR-4808	152	-9.72
F22H10.6	miR-44	145	-12.64
F22H10.6	miR-45	146	-12.64
F22H10.6	miR-67	142	-8.57
F22H10.6	miR-261	156	-9.75
F23B2.7a	miR-255	150	-10.71
F23B2.7a	miR-2216	145	-14.58
F23H12.5	miR-4923a	148	-9.2
F25B3.2	miR-253	140	-9.67
F25E5.5	miR-5547	141	-5.55
F25E5.5	miR-5593	159	-20.79
F26D11.2	miR-355	142	-5.01
F26D11.2	miR-8212	163	-11.05
F26F12.5a	miR-792	140	-12.8
F26F12.5a	miR-8209	166	-16.25
F26F12.5a	miR-8209	156	-14.88
F26F2.3	miR-2218a	146	-8.93
F26F2.4b	miR-255	140	-7.76
F26H11.4	miR-77	140	-18.8
F26H11.4	miR-81	149	-13.51
F26H11.4	miR-82	148	-13.89
F26H11.4	miR-232	144	-10.75
F26H11.4	miR-245	140	-9.04
F26H11.4	miR-270	145	-14.32
F26H11.4	miR-355	150	-6.42
F26H11.4	miR-1833	175	-23.62
F26H11.4	miR-2209a	163	-24.83
F26H11.4	miR-2209c	156	-21.08
F26H11.4	miR-4814	149	-19.79
F26H11.4	miR-4924	144	-8.45
F26H11.4	miR-4927	158	-13.48
F26H11.4	miR-8197	149	-11.99
F26H11.4	miR-8203	157	-18.93
F27C1.4	miR-35	151	-21.29
F27C1.4	miR-83	142	-6.51
F27C1.4	miR-85	173	-11.16
F27C1.4	miR-231	162	-18.56
F27C1.4	miR-245	140	-7.9
F27C1.4	miR-250	162	-19.58
F27C1.4	miR-251	144	-10.7
F27C1.4	miR-252	140	-9.57
F27C1.4	miR-261	155	-12.13
F27C1.4	miR-267	144	-13.25
F27C1.4	miR-270	144	-14.99
F27C1.4	miR-360	161	-23.63
F27C1.4	miR-792	140	-11.05
F27C1.4	miR-794	158	-15.71
F27C1.4	miR-1820	172	-14.18
F27C1.4	miR-1823	163	-20.48
F27C1.4	miR-2218a	146	-15.68
F27C1.4	miR-4920	164	-13.69
F27C1.4	miR-4923a	141	-11.57
F27C1.4	miR-4924	153	-8.24
F27C1.4	miR-5547	154	-13.98
F27C1.4	miR-5548	140	-17.54
F27C1.4	miR-5552	156	-11.57
F27C1.4	miR-5595	141	-7.89
F27C1.4	miR-8198	146	-9.36
F27C1.4	miR-8203	157	-17.52
F27C1.4	miR-8206	146	-4.73
F27C1.4	miR-8206	145	-4.52
F27C8.2	miR-790	148	-16.68
F27C8.2	miR-2219	157	-13.68
F27C8.2	miR-4936	166	-18.83
F27C8.2	miR-4936	152	-15.61
F27C8.2	miR-8206	155	-3.72
F27E5.9	miR-5547	140	-7.7
F28B4.4	miR-785	142	-19.88
F28B4.4	miR-2218a	170	-19.82
F28B4.4	miR-8205	147	-17.11
F28B4.4	miR-8209	146	-8.2
F31F4.1b	miR-85	162	-20.04
F31F4.1b	miR-239a	145	-13.74
F31F4.1b	miR-239b	152	-12.52
F34D10.8	miR-85	163	-7.59
F34D10.8	miR-85	163	-7.79
F34D6.1	miR-37	140	-15.05
F34D6.1	miR-247	148	-10.39
F34D6.1	miR-247	143	-11.53
F34D6.1	miR-259	154	-13.09
F34D6.1	miR-796	150	-12.53
F34D6.1	miR-1833	151	-17.61
F34D6.1	miR-4809	153	-14.09
F34D6.1	miR-4923a	149	-13.66
F34D6.1	miR-5595	157	-14.11
F35B3.4	let-7	147	-21.22
F35B3.4	miR-35	141	-17.7
F35B3.4	miR-39	151	-13.58
F35B3.4	miR-46	146	-18.26
F35B3.4	miR-47	142	-16.12
F35B3.4	miR-48	152	-20.03
F35B3.4	miR-77	152	-13.67
F35B3.4	miR-84	163	-22.97
F35B3.4	miR-86	154	-14.89
F35B3.4	miR-241	144	-19.2
F35B3.4	miR-245	145	-12.19
F35B3.4	miR-259	141	-11.82
F35B3.4	miR-259	140	-10.74
F35B3.4	miR-787	145	-9.41
F35B3.4	miR-795	159	-23.11
F35B3.4	miR-1021	144	-15.61
F35B3.4	miR-1823	142	-15.81
F35B3.4	miR-2218a	180	-23.07
F35B3.4	miR-4813	173	-13.63
F35B3.4	miR-5547	146	-8.82
F35B3.4	miR-8196a	149	-18.34
F35B3.4	miR-8196b	144	-14.82
F35C11.3	miR-59	146	-19.59
F35C11.3	miR-85	147	-8.74
F35C11.3	miR-124	145	-15.24
F35C11.3	miR-242	141	-12.2
F35C11.3	miR-247	159	-9.44
F35C11.3	miR-247	156	-9.68
F35C11.3	miR-247	146	-8.32
F35C11.3	miR-355	142	-6.35
F35C11.3	miR-355	140	-6.6
F35C11.3	miR-355	132	-10.83
F35C11.3	miR-792	141	-12.82
F35C11.3	miR-1820	153	-12.17
F35C11.3	miR-2216	148	-9.44
F35C11.3	miR-2218a	161	-10.86
F35C11.3	miR-4923a	167	-18.8
F35C11.3	miR-4923a	145	-10.4
F35C11.3	miR-4923a	141	-9.79
F35C11.3	miR-4923a	140	-7.9
F35C11.3	miR-8212	146	-13.53
F35D11.5	miR-42	161	-18.57
F35D11.5	miR-247	151	-14.46
F36D3.1	miR-4925	161	-13.51
F36H5.14	miR-87	163	-20.59
F36H5.14	miR-261	157	-13.69
F36H5.14	miR-800	148	-17.62
F36H5.14	miR-1820	148	-13.9
F36H5.14	miR-1822	145	-12.7
F36H5.14	miR-2219	154	-20.08
F36H5.14	miR-4809	164	-13.31
F36H5.14	miR-4938	152	-14.71
F36H5.14	miR-5547	140	-5.51
F36H5.14	miR-5549	152	-11.59
F36H5.14	miR-5549	152	-7.78
F36H5.14	miR-8193	150	-18.03
F37A4.4	miR-36	140	-11.45
F37A4.4	miR-51	151	-14.87
F37A4.4	miR-52	153	-12.69
F37A4.4	miR-53	153	-13.86
F37A4.4	miR-60	164	-18.34
F37A4.4	miR-80	145	-10.96
F37A4.4	miR-83	156	-14.95
F37A4.4	miR-1820	157	-8.76
F37A4.4	miR-1822	144	-14.98
F37A4.4	miR-2209b	140	-7.48
F37A4.4	miR-2218b	174	-16.06
F37A4.4	miR-4811	148	-10.94
F37A4.4	miR-4930	152	-20.73
F37A4.4	miR-5595	149	-9.3
F37A4.4	miR-8192	150	-18.52
F37H8.7	let-7	158	-20.17
F37H8.7	miR-48	142	-16.14
F37H8.7	miR-84	152	-15.3
F37H8.7	miR-241	143	-15.66
F37H8.7	miR-795	147	-17.53
F37H8.7	miR-2221	154	-22.04
F37H8.7	miR-4925	161	-10.43
F37H8.7	miR-4935	164	-39.95
F38B7.10	miR-36	146	-13.27
F38B7.10	miR-4811	147	-9.91
F38C2.7	miR-798	148	-8.98
F39F10.3	miR-43	144	-10.88
F39F10.3	miR-57	155	-24.86
F39F10.3	miR-58a	153	-24.84
F39F10.3	miR-70	155	-12.01
F39F10.3	miR-70	151	-6.69
F39F10.3	miR-85	153	-10.63
F39F10.3	miR-232	153	-21.15
F39F10.3	miR-243	153	-19.71
F39F10.3	miR-247	147	-10.95
F39F10.3	miR-248	145	-15.08
F39F10.3	miR-253	162	-8.31
F39F10.3	miR-265	142	-19.88
F39F10.3	miR-355	145	-9.32
F39F10.3	miR-355	140	-8.4
F39F10.3	miR-792	161	-17.39
F39F10.3	miR-1832a	154	-9.71
F39F10.3	miR-2218a	151	-16.69
F39F10.3	miR-4808	160	-14.02
F39F10.3	miR-4814	149	-10.15
F39F10.3	miR-4927	145	-13.5
F39F10.3	miR-5547	156	-7.18
F39F10.3	miR-5551	152	-10
F39F10.3	miR-8190	161	-23.63
F39F10.3	miR-4810b	156	-17.23
F40C5.1	miR-37	167	-24.64
F40C5.1	miR-40	152	-12.16
F40C5.1	miR-40	148	-19.34
F40C5.1	miR-42	140	-19.42
F40C5.1	miR-44	153	-19.82
F40C5.1	miR-44	149	-13.52
F40C5.1	miR-45	149	-11.92
F40C5.1	miR-64	149	-13.03
F40C5.1	miR-65	146	-12.72
F40C5.1	miR-66	152	-11.44
F40C5.1	miR-79	143	-8.54
F40C5.1	miR-85	143	-11.42
F40C5.1	miR-229	166	-17.56
F40C5.1	miR-253	140	-4.83
F40C5.1	miR-355	154	-12.67
F40C5.1	lsy-6	155	-13.64
F40C5.1	miR-784	151	-21.34
F40C5.1	miR-793	149	-12.8
F40C5.1	miR-1022	151	-14.25
F40C5.1	miR-1817	147	-12.73
F40C5.1	miR-1819	143	-9.17
F40C5.1	miR-1830	160	-21.61
F40C5.1	miR-2209a	140	-7.77
F40C5.1	miR-2209c	141	-7.77
F40C5.1	miR-2221	152	-16.1
F40C5.1	miR-5547	142	-9.58
F40C5.1	miR-5548	165	-23.69
F40C5.1	miR-8191	148	-23.07
F40C5.1	miR-8203	158	-15.3
F40C5.1	miR-8204	190	-42.53
F40G9.6	miR-60	141	-13.2
F40G9.6	miR-83	149	-10.93
F40G9.6	miR-86	140	-9.01
F40G9.6	miR-253	148	-9.23
F40G9.6	miR-259	147	-8.88
F40G9.6	miR-355	149	-5.01
F40G9.6	miR-356a	149	-11.18
F40G9.6	miR-2219	140	-8.9
F40G9.6	miR-2221	140	-6.64
F41C3.8b	miR-1020	145	-11.83
F41G3.18.2	miR-56	150	-22.28
F42G4.2	miR-4815	149	-10.11
F43D2.6	miR-261	145	-8.3
F43D2.6	miR-786	157	-12.66
F43D2.6	miR-1820	145	-14.64
F43D2.6	miR-1820	141	-9.77
F43D2.6	miR-2221	146	-7.2
F43D2.6	miR-4812	150	-18.07
F43D2.6	miR-4920	154	-10.75
F43D2.6	miR-5547	141	-4.92
F43D2.6	miR-5547	141	-6.73
F43G6.5	miR-55	155	-19.47
F43G6.5	miR-86	153	-12.63
F43G6.5	miR-243	145	-16.05
F43G6.5	miR-270	145	-12.06
F43G6.5	miR-791	145	-12.22
F43G6.5	miR-4809	159	-11.76
F43G6.5	miR-4925	156	-12.28
F43G6.5	miR-8197	142	-10.68
F43H9.4	miR-234	154	-10.01
F44A6.3	miR-1	146	-7.66
F44A6.3	miR-36	161	-15.79
F44D12.2	miR-8197	140	-7.94
F45E1.4	miR-1	142	-5.56
F45E1.4	miR-1	142	-5.7
F45E12.6	miR-49	146	-12.01
F45E12.6	miR-70	140	-4.56
F45E12.6	miR-255	155	-12.22
F45E12.6	miR-8206	160	-9.65
F46A8.11	miR-239a	160	-12.38
F46A8.11	miR-239b	152	-7.61
F46A8.11	miR-272	147	-16.55
F46A8.11	miR-355	158	-15.04
F46A8.11	miR-786	169	-9.88
F46A8.11	miR-786	145	-10.88
F46A8.11	miR-1020	146	-16.23
F46A8.11	miR-2217a	154	-19.47
F46A8.11	miR-4807	142	-10.32
F46A8.11	miR-4815	142	-13.69
F46A8.11	miR-4816	156	-17.86
F46A8.11	miR-4922	145	-8.73
F46A8.11	miR-4925	154	-11.99
F46A8.11	miR-4927	151	-10.58
F46A8.11	miR-4938	149	-16.7
F46A8.11	miR-8196b	151	-13.68
F46A8.11	miR-2217b	147	-16.89
F47C12.8	miR-1	145	-6.4
F47C12.8	miR-35	152	-18.32
F47C12.8	miR-46	156	-20.36
F47C12.8	miR-47	148	-14.49
F47C12.8	miR-72	160	-26.28
F47C12.8	miR-75	157	-13.7
F47C12.8	miR-245	140	-10.44
F47C12.8	miR-255	174	-24.4
F47C12.8	miR-261	150	-8.89
F47C12.8	miR-266	147	-18.83
F47C12.8	miR-355	150	-10.7
F47C12.8	miR-355	145	-7.44
F47C12.8	miR-355	145	-5.61
F47C12.8	miR-356a	148	-9.25
F47C12.8	miR-356a	142	-14.88
F47C12.8	miR-786	155	-16.05
F47C12.8	miR-789	150	-11.76
F47C12.8	miR-789	143	-12.4
F47C12.8	miR-789-2	144	-11.82
F47C12.8	miR-789-2	142	-11.8
F47C12.8	miR-800	165	-18.72
F47C12.8	miR-800	157	-8.95
F47C12.8	miR-1819	155	-9.5
F47C12.8	miR-1820	145	-14.52
F47C12.8	miR-2216	151	-14.23
F47C12.8	miR-4806	159	-19.02
F47C12.8	miR-4806	140	-17.22
F47C12.8	miR-4816	150	-13.73
F47C12.8	miR-4923a	155	-17.08
F47C12.8	miR-5547	147	-11.59
F47C12.8	miR-5547	143	-4.98
F47C12.8	miR-5549	146	-9.65
F47C12.8	miR-5552	145	-12.54
F47C12.8	miR-8188	146	-17.02
F47C12.8	miR-8198	145	-10.2
F47C12.8	miR-8198	145	-10.69
F47C12.8	miR-8200	154	-17.91
F47E1.17	miR-255	142	-9.91
F47F2.3	miR-60	151	-12.7
F47F2.3	miR-81	149	-10.34
F47F2.3	miR-82	149	-10.72
F47F2.3	miR-85	176	-15.31
F47F2.3	miR-268	159	-13.64
F47F2.3	miR-1020	155	-10.81
F47F2.3	miR-4811	153	-7.81
F47F2.3	miR-4811	150	-15.37
F47F2.3	miR-4925	156	-17.2
F47F2.3	miR-5547	145	-7.03
F47G3.1	miR-238	141	-15.65
F47G3.1	miR-4923a	150	-13.82
F48C1.9	miR-355	145	-6.98
F49B2.7	miR-2216	156	-15.25
F52C6.2	miR-49	151	-13.07
F52C6.2	miR-60	140	-13.72
F52C6.2	miR-85	168	-16.89
F52C6.2	miR-85	164	-7.41
F52C6.2	miR-85	150	-11.02
F52C6.2	miR-85	141	-6.69
F52C6.2	miR-86	149	-7.05
F52C6.2	miR-86	147	-13.71
F52C6.2	miR-235	167	-23.04
F52C6.2	miR-238	140	-9.47
F52C6.2	miR-239a	140	-9.62
F52C6.2	miR-239b	140	-9.07
F52C6.2	miR-247	157	-20.9
F52C6.2	miR-356a	144	-10.01
F52C6.2	miR-792	148	-12.52
F52C6.2	miR-1819	172	-17.88
F52C6.2	miR-2216	147	-14.67
F52C6.2	miR-4807	143	-13.86
F52C6.2	miR-4925	156	-13.01
F52C6.2	miR-4932	150	-22.05
F52C6.2	miR-4938	156	-19.21
F52C6.2	miR-5552	151	-15.29
F52C6.2	miR-8206	167	-9.93
F52C6.2	miR-8206	160	-7.18
F52C6.2	miR-8212	161	-13.94
F52D10.2	miR-2207	152	-13.09
F52E1.5	miR-37	140	-15.55
F52E1.5	miR-70	150	-7.15
F52E1.5	miR-79	162	-18.5
F52E1.5	miR-86	148	-12.67
F52E1.5	miR-254	150	-16.54
F52E1.5	miR-269	151	-18.61
F52E1.5	miR-789	147	-9.46
F52E1.5	miR-789-2	146	-12.65
F52E1.5	miR-797	151	-14.26
F52E1.5	miR-1021	171	-19.41
F52E1.5	miR-1832a	148	-12.29
F52E1.5	miR-2217a	151	-20
F52E1.5	miR-2953	153	-13.32
F52E1.5	miR-4938	163	-13.69
F52E1.5	miR-5595	142	-10.61
F52E1.5	miR-2217b	155	-20.06
F53A9.1	miR-250	145	-10.14
F53B3.5	miR-86	148	-8.27
F53B3.5	miR-244	155	-16.22
F53F1.2	miR-2217a	165	-24.81
F53F1.2	miR-2217b	169	-24.45
F53G12.4	miR-356b	140	-13.77
F53G12.8	miR-245	140	-8.57
F53G12.8	miR-273	142	-20.05
F53G12.8	lsy-6	156	-10.92
F53G12.8	miR-1820	167	-13.25
F53G12.8	miR-1829c	152	-11.87
F53G12.8	miR-2218a	156	-10.76
F53G12.8	miR-4929	171	-19.68
F53G12.8	miR-4929	163	-19.31
F53G12.8	miR-5552	153	-13.66
F53G12.8	miR-8209	140	-7.63
F54C9.14	miR-36	147	-18.85
F54C9.14	miR-40	146	-16.09
F54C9.14	miR-78	151	-19.55
F54C9.14	miR-79	145	-8.7
F54C9.14	miR-83	152	-11.48
F54C9.14	miR-124	166	-20.89
F54C9.14	miR-239a	140	-11.81
F54C9.14	miR-239b	140	-7.8
F54C9.14	miR-240	161	-13.38
F54C9.14	miR-254	146	-11.99
F54C9.14	miR-259	154	-12.41
F54C9.14	miR-355	142	-6.6
F54C9.14	miR-797	159	-15.07
F54C9.14	miR-1820	166	-11.19
F54C9.14	miR-1820	141	-15.49
F54C9.14	miR-2209a	145	-7.34
F54C9.14	miR-2209c	140	-7.34
F54C9.14	miR-2210	153	-15.13
F54C9.14	miR-2212	146	-14.08
F54C9.14	miR-2219	146	-10.59
F54C9.14	miR-2953	146	-15.47
F54C9.14	miR-4810a	150	-16.19
F54C9.14	miR-4925	145	-9.76
F54C9.14	miR-4925	147	-6.76
F54C9.14	miR-4929	150	-12.33
F54C9.14	miR-4932	145	-13.29
F54C9.14	miR-5547	151	-6.25
F54C9.14	miR-5547	151	-10.97
F54C9.14	miR-5547	143	-8.22
F54C9.14	miR-5593	164	-23.93
F54C9.14	miR-8190	160	-13.09
F54C9.14	miR-8194	162	-21.87
F54C9.14	miR-8209	161	-16.02
F54C9.14	miR-8209	159	-13.21
F54D11.3	miR-261	145	-7.86
F54D5.17	miR-2	155	-10.1
F54D5.17	miR-50	156	-14
F54D5.17	miR-62	142	-9.33
F54D5.17	miR-79	156	-18.74
F54D5.17	miR-86	140	-7.8
F54D5.17	miR-355	140	-6.6
F54D5.17	miR-1020	150	-10.43
F54D5.17	miR-1820	151	-8.98
F54D5.17	miR-1820	141	-7.22
F54D5.17	miR-2218a	140	-6.72
F54D5.17	miR-4923a	154	-11.53
F54D5.17	miR-4925	150	-12.88
F54D5.17	miR-4931	154	-17.02
F54D5.17	miR-5547	143	-4.98
F54D5.17	miR-5547	143	-11.57
F54D5.17	miR-5547	140	-8.14
F54D5.17	miR-8193	151	-18.96
F54D5.17	miR-8199	140	-12.2
F54F7.2	miR-4924	156	-7.14
F54F7.2	miR-5549	146	-8.51
F54F7.2	miR-8190	153	-14.21
F54H12.2	miR-61	142	-15.96
F54H12.2	miR-71	151	-12.41
F54H12.2	miR-85	175	-15.76
F54H12.2	miR-245	148	-12.3
F54H12.2	miR-247	146	-10.81
F54H12.2	miR-355	150	-12.95
F54H12.2	miR-357	140	-15.58
F54H12.2	miR-1018	153	-12
F54H12.2	miR-1018	150	-15.36
F54H12.2	miR-1018	149	-12.89
F54H12.2	miR-1018	149	-12.65
F54H12.2	miR-1018	148	-11.34
F54H12.2	miR-1021	150	-12.04
F54H12.2	miR-1021	145	-10.37
F54H12.2	miR-2217a	140	-15.49
F54H12.2	miR-4814	150	-20.15
F54H12.2	miR-4925	160	-14.43
F54H12.2	miR-4925	151	-9.19
F54H12.2	miR-4925	143	-10.76
F54H12.2	miR-5595	151	-16.17
F54H12.2	miR-2217b	141	-13.31
F55A12.5	miR-87	140	-14.8
F55A12.5	miR-255	150	-13.21
F55B11.5	miR-2	166	-18.76
F55B11.5	miR-43	156	-12.3
F55B11.5	miR-70	142	-6.79
F55B11.5	miR-79	146	-9
F55B11.5	miR-81	147	-13.8
F55B11.5	miR-82	150	-12.4
F55B11.5	miR-83	152	-12.58
F55B11.5	miR-255	140	-6.46
F55B11.5	miR-355	144	-8.89
F55B11.5	miR-794	140	-10.29
F55B11.5	miR-4807	140	-13.15
F55B11.5	miR-4922	152	-12.89
F55B11.5	miR-4927	160	-16.91
F55B11.5	miR-5547	152	-5.08
F55C12.5a	miR-4925	167	-16.31
F55C12.5a	miR-4938	141	-9.63
F55G11.8	miR-2	140	-7.59
F55G11.8	miR-55	153	-14.93
F55G11.8	miR-253	171	-14.94
F55G11.8	miR-8198	142	-9.27
F55G11.8	miR-8202	148	-11.44
F55H2.8	miR-2	140	-8.01
F55H2.8	miR-247	152	-9.78
F55H2.8	miR-247	149	-8.37
F55H2.8	miR-355	141	-10.52
F55H2.8	miR-2207	146	-12.95
F55H2.8	miR-2215	149	-22.03
F55H2.8	miR-1832b	143	-12.56
F55H2.8	miR-4925	140	-7.49
F55H2.8	miR-8203	146	-17.03
F56B3.3	miR-39	145	-9.3
F56B3.3	miR-60	147	-14.08
F56B3.3	miR-83	153	-11.39
F56B3.3	miR-85	160	-10.77
F56B3.3	miR-85	153	-8.96
F56B3.3	miR-86	143	-8.39
F56B3.3	miR-86	141	-8.25
F56B3.3	miR-86	140	-7.3
F56B3.3	miR-253	149	-11.11
F56B3.3	miR-261	152	-9.74
F56B3.3	miR-261	140	-11.44
F56B3.3	miR-355	140	-8.5
F56B3.3	miR-790	145	-16.76
F56B3.3	miR-797	158	-12.93
F56B3.3	miR-1829c	144	-12.43
F56B3.3	miR-2215	154	-23.35
F56B3.3	miR-2218b	165	-15.72
F56B3.3	miR-2219	148	-14.17
F56B3.3	miR-5547	145	-6.43
F56B3.3	miR-8190	154	-17.96
F56B3.3	miR-8206	152	-6.18
F56D2.5	miR-5549	155	-9.89
F56D2.8	miR-36	148	-9.95
F56D2.8	miR-70	147	-4.68
F56D2.8	miR-79	151	-10.83
F56D2.8	miR-786	145	-8.75
F56D2.8	miR-1021	151	-13.35
F56D2.8	miR-1817	153	-12.66
F56D2.8	miR-1820	149	-12.86
F56D2.8	miR-4925	154	-11.48
F56D2.8	miR-5549	145	-6.9
F57C12.6	miR-355	148	-9.89
F57C12.6	miR-5549	157	-10.91
F57C2.5a.2	miR-60	147	-17.51
F57C2.5a.2	miR-86	143	-9.1
F58D5.2b.1	miR-793	158	-17.82
F58E2.4	miR-39	150	-11.85
F58E6.11	miR-71	153	-20.32
F58G1.7	miR-5547	163	-9.97
F58G1.7	miR-8206	143	-6.74
F58H10.1	miR-86	143	-9.44
F58H10.1	miR-253	146	-8.76
F58H7.5	miR-267	144	-15.31
F58H7.5	miR-2207	160	-19.42
F59D12.1	miR-255	141	-7.01
F59D12.1	miR-2210	140	-10.64
F59D12.1	miR-2212	144	-12.07
F59D12.1	miR-4923a	146	-12.22
F59D12.1	miR-8206	153	-3.69
F59F4.1	miR-39	147	-15.89
F59F4.1	miR-50	155	-12.78
F59F4.1	miR-54	150	-12.22
F59F4.1	miR-62	154	-9.63
F59F4.1	miR-1817	146	-13.07
faah-6	miR-787	153	-10.4
far-6	miR-49	156	-17.48
far-6	miR-70	156	-12.04
far-6	miR-255	158	-14.37
far-6	miR-259	141	-7.4
far-6	miR-2208a	150	-13.27
far-6	miR-2208b	150	-15.44
far-6	miR-4925	164	-16.33
fax-1	miR-1830	145	-9.73
fax-1	miR-4924	142	-5.26
fbxa-108	miR-41	145	-10.3
fbxa-108	miR-85	141	-9.61
fbxa-108	miR-356a	140	-10.01
fbxa-108	miR-789	150	-12.84
fbxa-108	miR-789-2	154	-20.98
fbxa-108	miR-1820	161	-20.39
fbxa-108	miR-2207	144	-8.16
fbxa-108	miR-2216	154	-14.05
fbxa-108	miR-4810a	149	-12.31
fbxa-108	miR-4925	148	-10.32
fbxa-108	miR-8203	167	-17.74
fbxa-163	miR-36	140	-10.93
fbxa-163	miR-39	147	-11.9
fbxa-163	miR-43	154	-17.93
fbxa-163	miR-74	154	-20.43
fbxa-163	miR-76	146	-21.12
fbxa-163	miR-79	153	-12.47
fbxa-163	miR-85	163	-14.35
fbxa-163	miR-86	150	-12.59
fbxa-163	miR-253	140	-4.83
fbxa-163	miR-355	142	-5.26
fbxa-163	miR-792	142	-13.5
fbxa-163	miR-796	149	-16.35
fbxa-163	miR-1021	155	-16.13
fbxa-163	miR-1817	148	-15.74
fbxa-163	miR-1818	148	-15.73
fbxa-163	miR-2209a	146	-9.72
fbxa-163	miR-2209c	145	-9.72
fbxa-163	miR-2211	160	-22.78
fbxa-163	miR-2209b	141	-10.54
fbxa-163	miR-2219	155	-15.93
fbxa-163	miR-4925	148	-12.84
fbxa-163	miR-4925	143	-10.83
fbxa-163	miR-4931	150	-20.1
fbxa-163	miR-5547	155	-6.26
fbxa-163	miR-5595	148	-17.78
fbxa-163	miR-8186	142	-15.09
fbxa-163	miR-8203	146	-13.49
fbxa-197	miR-1	140	-6.46
fbxa-197	miR-2	143	-14.69
fbxa-197	miR-36	148	-19.25
fbxa-197	miR-38	141	-15.03
fbxa-197	miR-39	154	-15.72
fbxa-197	miR-43	156	-12.55
fbxa-197	miR-70	152	-9.4
fbxa-197	miR-83	151	-10.68
fbxa-197	miR-85	175	-18.2
fbxa-197	miR-85	158	-11.45
fbxa-197	miR-255	160	-15.37
fbxa-197	miR-255	147	-7.15
fbxa-197	miR-259	153	-11.31
fbxa-197	miR-265	147	-21.9
fbxa-197	miR-271	142	-21.38
fbxa-197	miR-357	149	-13.28
fbxa-197	miR-357	142	-9.86
fbxa-197	miR-788	154	-13.31
fbxa-197	miR-789	147	-14.61
fbxa-197	miR-789-2	146	-16.73
fbxa-197	miR-797	153	-13.87
fbxa-197	miR-1022	166	-19.59
fbxa-197	miR-1832a	164	-25.27
fbxa-197	miR-1832b	140	-15.16
fbxa-197	miR-2221	149	-15.13
fbxa-197	miR-2221	143	-10.93
fbxa-197	miR-4811	150	-7.43
fbxa-197	miR-4925	152	-10.78
fbxa-197	miR-4925	148	-13.74
fbxa-197	miR-4938	166	-17.59
fbxa-197	miR-5545	144	-12.97
fbxa-197	miR-8195	152	-19.83
fbxa-197	miR-8203	147	-10.31
fbxa-197	miR-8209	151	-11.15
fbxa-197	miR-8209	141	-9.84
fbxa-197	miR-8210	156	-19.97
fbxa-32	miR-1830	169	-12.24
fbxa-50	miR-50	153	-14.78
fbxa-50	miR-62	140	-10.92
fbxa-50	miR-70	141	-9.57
fbxa-50	miR-81	145	-9.42
fbxa-50	miR-82	147	-12.03
fbxa-50	miR-231	149	-12.02
fbxa-50	miR-356a	147	-10.5
fbxa-50	miR-800	157	-15.19
fbxa-50	miR-1022	157	-16.15
fbxa-50	miR-2207	140	-9.31
fbxa-50	miR-4807	148	-16.37
fbxa-50	miR-4809	152	-9.08
fbxa-50	miR-4925	149	-8.88
fbxa-50	miR-5594	148	-12.06
fbxa-50	miR-8206	145	-5.93
fbxa-62	miR-85	156	-13.89
fbxa-62	miR-243	142	-14.59
fbxa-62	miR-247	142	-9.95
fbxa-62	miR-253	155	-8.89
fbxa-62	miR-1020	156	-17.9
fbxa-62	miR-1820	162	-11.95
fbxa-62	miR-1821	160	-19.66
fbxa-62	miR-2207	147	-17.22
fbxa-62	miR-2216	154	-16.54
fbxa-62	miR-4807	140	-14.56
fbxa-62	miR-8195	142	-15.31
fbxa-76	miR-2	148	-11.61
fbxa-76	miR-4929	150	-11.94
fbxa-89	miR-35	156	-12.04
fbxa-89	miR-35	153	-15.4
fbxa-89	miR-72	154	-18.51
fbxa-89	miR-74	150	-26.96
fbxa-89	miR-76	149	-20.25
fbxa-89	miR-85	157	-9.68
fbxa-89	miR-86	146	-13.15
fbxa-89	miR-247	152	-12.85
fbxa-89	miR-253	151	-5.15
fbxa-89	miR-261	168	-16.58
fbxa-89	miR-266	151	-17.94
fbxa-89	miR-267	144	-14.25
fbxa-89	miR-354	143	-19.74
fbxa-89	miR-785	145	-12.12
fbxa-89	miR-1820	159	-10.25
fbxa-89	miR-1820	155	-9.92
fbxa-89	miR-1829c	156	-15.31
fbxa-89	miR-1829c	146	-12.43
fbxa-89	miR-2207	140	-10.5
fbxa-89	miR-2218a	153	-8.98
fbxa-89	miR-2218a	147	-10.77
fbxa-89	miR-4807	154	-18.58
fbxa-89	miR-4807	153	-19.71
fbxa-89	miR-4807	152	-17.73
fbxa-89	miR-4923a	150	-12.67
fbxa-89	miR-4925	145	-7.45
fbxa-89	miR-4927	151	-16.18
fbxa-89	miR-4932	167	-20.81
fbxa-89	miR-4936	155	-17.79
fbxa-89	miR-5549	145	-6.66
fbxa-89	miR-5595	147	-14.41
fbxa-89	miR-8188	146	-15.91
fbxa-89	miR-8195	140	-13.01
fbxa-89	miR-8197	151	-10.19
fbxa-89	miR-8209	146	-10.13
fbxb-33	miR-1820	155	-11.91
fbxb-77	miR-247	140	-8.63
fbxb-77	miR-247	140	-12.62
fbxb-77	miR-1828	152	-14.5
fbxb-77	miR-4923a	144	-11.28
fbxb-77	miR-5593	161	-17.46
fbxb-77	miR-5593	156	-17.46
fbxb-77	miR-5593	155	-16.94
fbxc-20	miR-251	146	-11.27
fbxc-20	miR-252	146	-9.24
fbxc-20	miR-4920	146	-8.51
fbxc-20	miR-4938	153	-14.39
fbxc-30	miR-232	147	-16.11
fbxc-30	miR-356a	142	-10.01
fbxc-34	miR-8209	151	-8.85
fbxc-34	miR-8209	151	-10.71
fbxc-35	miR-355	153	-12.23
fbxc-35	miR-355	151	-6.97
fbxc-35	miR-355	140	-5.01
fbxc-35	miR-5593	142	-14
fbxc-35	miR-5595	153	-20.56
fbxc-35	miR-4810b	140	-10.21
fbxc-35	miR-8196b	144	-9.14
fbxc-39	miR-247	152	-9.85
fipp-1	miR-5547	155	-4.98
flad-1	miR-50	144	-12.79
flad-1	miR-54	147	-12.88
flad-1	miR-61	145	-16.13
flad-1	miR-62	146	-11.08
flad-1	miR-4816	144	-12.95
fln-2	miR-265	148	-20.29
fln-2	miR-8203	145	-10.42
fln-2	miR-8209	151	-9.46
fog-1	miR-253	151	-15.18
fog-3	miR-5547	158	-18.56
frh-1	miR-72	140	-13.46
frh-1	miR-266	149	-15.3
frh-1	miR-268	140	-15.48
frh-1	miR-8188	140	-12.93
frm-9	miR-2217a	158	-26.33
frm-9	miR-5547	146	-10.54
frm-9	miR-5549	153	-15.52
frm-9	miR-2217b	162	-25.78
frpr-14	miR-2	140	-8.17
frpr-14	miR-253	155	-10.8
frpr-14	miR-5552	151	-19
gap-2	miR-2	167	-23.92
gap-2	miR-798	148	-10.8
gap-2	miR-2218a	151	-10.17
gap-2	miR-4937	157	-22.48
gap-2	miR-5552	153	-14.97
gba-1	miR-42	145	-16.01
gba-1	miR-85	143	-9.94
gba-1	miR-2209a	141	-6.67
gba-1	miR-2209c	141	-8.38
gba-1	miR-2218a	165	-9.98
gba-1	miR-2221	159	-10.96
gba-1	miR-4925	171	-18.45
gba-1	miR-5547	154	-10.14
gba-1	miR-5547	142	-5.74
gba-1	miR-8202	143	-14.3
gcy-31	miR-261	147	-6.49
gcy-31	miR-265	160	-26.32
gcy-31	miR-794	140	-7.9
gcy-31	miR-1829a	154	-15.89
gcy-31	miR-2209b	167	-14.32
gcy-31	miR-5551	145	-10.17
gcy-9	miR-2216	170	-20.19
gei-13	miR-5547	142	-5.07
gei-13	miR-8209	160	-12.84
gei-15	miR-8206	152	-4.54
glb-18	miR-2207	156	-12.27
glb-18	miR-5549	154	-6.82
glh-1	miR-8198	146	-10.56
glh-1	miR-8202	140	-15.81
glod-4	miR-796	156	-13.09
glr-6	miR-243	142	-14.32
glr-6	miR-4925	152	-11.49
glr-7	miR-41	153	-17.09
glr-7	miR-60	156	-15.65
glr-7	miR-239a	146	-12.72
glr-7	miR-239b	145	-8.28
glr-7	miR-261	153	-8.65
glr-7	miR-787	143	-10.01
glr-7	miR-1828	158	-15.5
glr-7	miR-2216	150	-9.63
glr-7	miR-4927	171	-18.89
glr-7	miR-5547	147	-6.34
glr-7	miR-5552	144	-9.88
glr-7	miR-8196b	165	-9.93
glr-8	miR-2216	166	-16.6
gly-19	miR-797	140	-10.49
gna-2	miR-786	156	-10.44
gpa-4	miR-1018	146	-9.48
gpcp-2	miR-356b	143	-15.89
gpx-6	miR-1	145	-9.73
gpx-6	miR-44	153	-20.29
gpx-6	miR-44	153	-20.37
gpx-6	miR-45	157	-22.75
gpx-6	miR-45	146	-16.78
gpx-6	miR-247	147	-9.02
gpx-6	miR-255	158	-10.31
gpx-6	miR-272	167	-25.98
gpx-6	miR-272	163	-23.27
gpx-6	miR-272	159	-21.71
gpx-6	miR-356a	151	-9.34
gpx-6	miR-356a	141	-7.75
gpx-6	miR-357	148	-12.09
gpx-6	miR-357	140	-8.81
gpx-6	miR-785	146	-14.1
gpx-6	miR-796	153	-17.89
gpx-6	miR-796	148	-14.85
gpx-6	miR-796	146	-14.38
gpx-6	miR-796	146	-14.5
gpx-6	miR-1019	157	-15.29
gpx-6	miR-1829b	153	-15.94
gpx-6	miR-2207	147	-9.93
gpx-6	miR-2216	148	-13.23
gpx-6	miR-4807	146	-12.33
gpx-6	miR-4808	154	-12.44
gpx-6	miR-4924	143	-8.18
gpx-6	miR-4926	160	-19.48
gpx-6	miR-5547	143	-8.35
gpx-6	miR-8190	149	-12.85
gpx-6	miR-8190	144	-12.95
gpx-6	miR-4810b	151	-14.59
gpx-6	miR-8206	156	-7.08
gst-2	let-7	154	-17.11
gst-2	miR-34	157	-28.1
gst-2	miR-35	145	-16.02
gst-2	miR-48	146	-17.48
gst-2	miR-49	145	-10.66
gst-2	miR-84	158	-17.63
gst-2	miR-232	154	-14.49
gst-2	miR-238	153	-12.51
gst-2	miR-241	144	-18.69
gst-2	miR-261	148	-10.75
gst-2	miR-272	151	-15.42
gst-2	miR-355	140	-7.75
gst-2	miR-795	152	-20.32
gst-2	miR-1020	140	-10.08
gst-2	miR-1824	145	-14.04
gst-2	miR-1832a	145	-11.89
gst-2	miR-2209a	140	-9.71
gst-2	miR-2209c	140	-8.15
gst-2	miR-2210	148	-11.36
gst-2	miR-2212	147	-13.19
gst-2	miR-2219	150	-12.48
gst-2	miR-4920	159	-10.76
gst-2	miR-4925	147	-9.31
gst-2	miR-4933	144	-19.14
gst-2	miR-4935	150	-24.68
gst-2	miR-5547	160	-7.3
gst-2	miR-5547	140	-7.18
gst-2	miR-5593	158	-16.38
gur-3	miR-242	140	-12.92
H11E01.3	miR-34	151	-20.26
H11E01.3	miR-38	150	-13.18
H11E01.3	miR-55	152	-10.32
H11E01.3	miR-81	140	-8.57
H11E01.3	miR-82	145	-11.3
H11E01.3	miR-85	164	-19.5
H11E01.3	miR-85	158	-6.61
H11E01.3	miR-230	145	-16.24
H11E01.3	miR-251	144	-8.77
H11E01.3	miR-252	148	-8.34
H11E01.3	miR-261	161	-11.63
H11E01.3	miR-355	157	-11.73
H11E01.3	miR-355	141	-7.16
H11E01.3	miR-787	143	-9.42
H11E01.3	miR-1820	188	-21.34
H11E01.3	miR-1820	146	-8.76
H11E01.3	miR-1824	143	-17.89
H11E01.3	miR-1832a	140	-7.98
H11E01.3	miR-2220	150	-12.26
H11E01.3	miR-4808	152	-10.33
H11E01.3	miR-4925	157	-9.8
H11E01.3	miR-4933	140	-17.68
H11E01.3	miR-5545	140	-11.79
H11E01.3	miR-8198	157	-15.78
H11E01.3	miR-8212	146	-10.13
H20E11.1a	miR-50	141	-9.58
H20E11.1a	miR-62	150	-9.78
H28G03.1a	miR-8198	140	-11.07
H28G03.1a	miR-8202	150	-12.29
hat-1	miR-1018	160	-17.61
hat-1	miR-1021	150	-17.78
hat-1	miR-1022	147	-11.8
hcp-1	miR-1820	184	-16.27
him-18	miR-8206	149	-6.45
his-25	miR-800	151	-10.34
his-38	miR-5547	140	-6.45
his-54	miR-248	146	-16.61
his-54	miR-784	149	-17.56
his-54	miR-4925	156	-16.12
his-54	miR-5593	140	-14.33
his-54	miR-5595	165	-16.82
his-54	miR-8207	163	-24.54
his-54	miR-8207	158	-24.21
his-54	miR-2217b-1	152	-20.76
his-65	miR-1833	156	-16.38
his-65	miR-4925	148	-7.13
his-65	miR-5547	151	-15.18
hlh-8	miR-1	150	-8.75
hlh-8	miR-34	157	-22.32
hlh-8	miR-42	145	-14.86
hlh-8	miR-43	144	-11.11
hlh-8	miR-44	141	-16.63
hlh-8	miR-45	140	-13.22
hlh-8	miR-60	145	-12.67
hlh-8	miR-86	148	-14.91
hlh-8	miR-233	161	-29.14
hlh-8	miR-239a	140	-9.28
hlh-8	miR-239b	147	-8.83
hlh-8	miR-245	149	-16.29
hlh-8	miR-356a	155	-15.63
hlh-8	miR-787	147	-8.7
hlh-8	miR-789	152	-10.79
hlh-8	miR-789-2	152	-10.56
hlh-8	miR-790	146	-16.76
hlh-8	miR-1817	144	-12.61
hlh-8	miR-1824	140	-18.52
hlh-8	miR-2218a	143	-14.01
hlh-8	miR-4808	156	-14.92
hlh-8	miR-4933	142	-22.89
hlh-8	miR-4938	151	-12.65
hlh-8	miR-5547	157	-10.61
hlh-8	miR-5547	151	-6.25
hlh-8	miR-8209	156	-12.44
hlh-8	miR-8209	143	-9.01
hmgs-1	miR-41	141	-13.86
hmgs-1	miR-248	152	-15.39
hmgs-1	miR-355	151	-10.51
hmgs-1	miR-355	142	-5.46
hmgs-1	miR-788	145	-14.6
hmgs-1	miR-1819	154	-15.25
hmgs-1	miR-2217a	153	-22.16
hmgs-1	miR-2217a	148	-18.28
hmgs-1	miR-4923b	145	-16.66
hmgs-1	miR-5548	154	-21.35
hmgs-1	miR-356b	146	-16.56
hmgs-1	miR-5595	155	-10.53
hmgs-1	miR-2217b-1	156	-19.89
hmgs-1	miR-2217b	153	-22.22
hmgs-1	miR-2217b	147	-18.28
hpo-36	miR-85	150	-10.64
hpo-7	miR-2	163	-19.11
hpo-7	miR-87	147	-15.3
hpo-7	miR-255	153	-9.47
hpo-7	miR-355	140	-8.31
hpo-7	miR-789	140	-9.98
hpo-7	miR-789-2	140	-10.25
hpo-7	miR-1828	145	-12.58
hpo-7	miR-4807	140	-11.57
hpo-7	miR-4809	150	-9.14
hpo-7	miR-5595	148	-12.03
htp-2	miR-36	140	-9.3
htp-2	miR-789	140	-11.05
htp-2	miR-789-2	144	-11.52
ife-4	miR-49	152	-11.63
ife-4	miR-71	159	-20.91
ife-4	miR-255	154	-8.79
ife-4	miR-2207	141	-8.77
ife-4	miR-4929	155	-16.72
ife-4	miR-5547	147	-6.4
ife-4	miR-5547	142	-6.46
ife-4	miR-5549	182	-20.63
ife-4	miR-5549	145	-9.16
ife-4	miR-5552	150	-17.72
ife-4	miR-5553	159	-21.08
ife-4	miR-8211	150	-17.71
igdb-2	miR-5551	143	-9.84
igdb-2	miR-8202	157	-16.43
igdb-2	miR-8203	143	-14.3
imb-3	miR-247	146	-10.68
imb-3	miR-254	151	-12.14
imb-3	miR-792	140	-9.61
imb-3	miR-1830	140	-9.19
imb-3	miR-2953	150	-15.44
imb-3	miR-4811	140	-8.93
ins-22	miR-4811	151	-10.71
ins-37	miR-41	149	-18.52
ins-37	miR-87	159	-20.9
ins-37	miR-246	140	-12.6
ins-37	miR-1822	162	-15.67
ins-37	miR-1822	160	-23.5
ins-37	miR-2208a	149	-14.41
ins-37	miR-2208b	145	-14.17
ins-37	miR-4816	155	-12.24
ins-37	miR-4816	142	-10.9
ins-37	miR-4925	153	-11.12
ins-37	miR-4927	147	-15.48
ins-37	miR-5549	156	-11.3
ins-37	miR-8211	145	-20.64
ipla-4	miR-800	143	-10.62
ipla-4	miR-4938	146	-11.95
irld-5	miR-5553	148	-16.63
ivd-1	miR-247	144	-9.31
ivd-1	miR-355	145	-6.41
ivd-1	miR-4923a	153	-15.79
jhdm-1	let-7	144	-15.1
jhdm-1	miR-44	155	-12.64
jhdm-1	miR-48	152	-16.22
jhdm-1	miR-84	157	-17.34
jhdm-1	miR-241	159	-18.23
jhdm-1	miR-355	140	-8.63
jhdm-1	miR-795	159	-21.02
jhdm-1	miR-2207	158	-15.56
jhdm-1	miR-4938	148	-17.79
jhdm-1	miR-8190	159	-20.13
jhdm-1	miR-8198	143	-12.18
[truncated: 10,750 more rows]

## Sheet: miRanda (stringent)
gene name	miRNA lost
	name	score	energy
arrd-9	miR-78	157	-23.24
C05C9.3	miR-265	154	-23.01
C13C4.7	miR-229	178	-22.72
C18H2.1	miR-58b	164	-20.37
C32E8.4.1	miR-272	156	-21.27
C35E7.3	miR-265	157	-21.01
C35E7.3	miR-272	168	-22.77
C45B11.5	miR-2211	172	-23.71
C45B11.5	miR-8211	154	-25.03
C48D1.9a	miR-259	154	-20.81
C49G7.7	miR-8210	151	-21.1
C49H3.12a	miR-356b	160	-22.06
ceh-21	miR-36	163	-25.1
clp-6	miR-8208	151	-23.14
ctbp-1	miR-793	165	-22.18
E02H9.7.1	miR-5546	159	-20.18
E02H9.7.1	miR-78	157	-23.71
efsc-1	miR-2218a	171	-20.8
efsc-1	miR-8205	158	-21.56
efsc-1	miR-2218b	175	-23.63
efsc-1	miR-5552	171	-27.2
efsc-1	miR-2218b	180	-27.24
enu-3.1	miR-8194	170	-23.94
enu-3.6	miR-8194	170	-23.94
F08H9.4b	miR-5550	167	-21.61
F09E10.7c	miR-4929	161	-21.34
F09E10.7c	miR-4923a	162	-23.91
F10C2.3	miR-4937	153	-25.02
F10D7.3	miR-1822	167	-25.42
F10E7.1	miR-1829c	153	-20.53
F10E7.1	miR-44	168	-21.42
F10E7.1	miR-789	155	-21.64
F10E7.1	miR-52	158	-22.31
F10E7.1	miR-53	159	-22.31
F10E7.1	miR-54	154	-22.65
F10E7.1	miR-2218a	171	-23.21
F10E7.1	miR-44	164	-25.08
F10E7.1	miR-40	172	-25.22
F11A5.13	miR-5593	170	-22.59
F11A5.13	miR-249	151	-24.38
F11A5.13	miR-4935	151	-26.15
F11F1.8	miR-82	153	-21.49
F11F1.8	miR-81	154	-23.52
F13A2.10	miR-8207	160	-23.35
F14F7.4	miR-272	152	-20.54
F25E5.5	miR-5593	159	-20.79
F26H11.4	miR-2209c	156	-21.08
F26H11.4	miR-1833	175	-23.62
F26H11.4	miR-2209a	163	-24.83
F27C1.4	miR-1823	163	-20.48
F27C1.4	miR-35	151	-21.29
F27C1.4	miR-360	161	-23.63
F31F4.1b	miR-85	162	-20.04
F35B3.4	miR-48	152	-20.03
F35B3.4	miR-84	163	-22.97
F35B3.4	miR-2218a	180	-23.07
F35B3.4	miR-795	159	-23.11
F36H5.14	miR-2219	154	-20.08
F36H5.14	miR-87	163	-20.59
F37A4.4	miR-4930	152	-20.73
F37H8.7	let-7	158	-20.17
F37H8.7	miR-2221	154	-22.04
F37H8.7	miR-4935	164	-39.95
F39F10.3	miR-232	153	-21.15
F39F10.3	miR-8190	161	-23.63
F39F10.3	miR-58a	153	-24.84
F39F10.3	miR-57	155	-24.86
F40C5.1	miR-784	151	-21.34
F40C5.1	miR-1830	160	-21.61
F40C5.1	miR-5548	165	-23.69
F40C5.1	miR-37	167	-24.64
F40C5.1	miR-8204	190	-42.53
F41G3.18.2	miR-56	150	-22.28
F47C12.8	miR-46	156	-20.36
F47C12.8	miR-255	174	-24.4
F47C12.8	miR-72	160	-26.28
F52C6.2	miR-247	157	-20.9
F52C6.2	miR-4932	150	-22.05
F52C6.2	miR-235	167	-23.04
F52E1.5	miR-2217a	151	-20
F52E1.5	miR-2217b	155	-20.06
F53F1.2	miR-2217b	169	-24.45
F53F1.2	miR-2217a	165	-24.81
F54C9.14	miR-124	166	-20.89
F54C9.14	miR-8194	162	-21.87
F54C9.14	miR-5593	164	-23.93
F54H12.2	miR-4814	150	-20.15
F56B3.3	miR-2215	154	-23.35
F58E6.11	miR-71	153	-20.32
fbxa-108	miR-1820	161	-20.39
fbxa-108	miR-789-2	154	-20.98
fbxa-163	miR-4931	150	-20.1
fbxa-163	miR-74	154	-20.43
fbxa-163	miR-2211	160	-22.78
fbxa-197	miR-1832a	164	-25.27
fbxa-89	miR-4932	167	-20.81
fbxa-89	miR-74	150	-26.96
fbxc-35	miR-5595	153	-20.56
frm-9	miR-2217b	162	-25.78
frm-9	miR-2217a	158	-26.33
gap-2	miR-4937	157	-22.48
gap-2	miR-2	167	-23.92
gcy-31	miR-265	160	-26.32
gcy-9	miR-2216	170	-20.19
gpx-6	miR-44	153	-20.29
gpx-6	miR-44	153	-20.37
gpx-6	miR-272	159	-21.71
gpx-6	miR-45	157	-22.75
gpx-6	miR-272	163	-23.27
gpx-6	miR-272	167	-25.98
gst-2	miR-795	152	-20.32
gst-2	miR-4935	150	-24.68
gst-2	miR-34	157	-28.1
H11E01.3	miR-34	151	-20.26
H11E01.3	miR-1820	188	-21.34
his-54	miR-2217b-1	152	-20.76
his-54	miR-8207	158	-24.21
his-54	miR-8207	163	-24.54
hlh-8	miR-34	157	-22.32
hlh-8	miR-233	161	-29.14
hmgs-1	miR-5548	154	-21.35
hmgs-1	miR-2217a	153	-22.16
hmgs-1	miR-2217b	153	-22.22
ife-4	miR-5549	182	-20.63
ife-4	miR-71	159	-20.91
ife-4	miR-5553	159	-21.08
ins-37	miR-87	159	-20.9
ins-37	miR-1822	160	-23.5
jhdm-1	miR-8190	159	-20.13
jhdm-1	miR-795	159	-21.02
K02B12.2	miR-4921	155	-23.18
K07E3.9	miR-8190	167	-22
K08F4.12	miR-795	152	-20.32
K08F4.12	miR-4935	150	-24.68
K08F4.12	miR-34	157	-28.1
K08H2.4	miR-1021	166	-23.55
K09F6.5	miR-5545	153	-20.19
K09F6.5	miR-240	158	-22.04
K09F6.5	miR-4805	157	-22.36
K09F6.5	miR-71	171	-24.22
kin-33	miR-2216	163	-20.65
klp-13	miR-1019	162	-20.66
klp-13	miR-4807	162	-21.49
klp-13	miR-4806	159	-25.45
klp-13	miR-8208	163	-27.56
lit-1	miR-37	152	-21.72
memb-2	miR-2219	155	-21.61
memb-2	miR-61	161	-22.71
memb-2	miR-2211	173	-34.2
msd-4	miR-8211	155	-26.35
ncx-1	miR-796	164	-20.72
nep-15	miR-1821	153	-20.89
nhr-113	miR-5545	153	-21.81
nhr-113	miR-5546	164	-22.76
nhr-154	let-7	172	-24.28
nhr-259	miR-5545	153	-21.81
nipi-4	miR-84	152	-20.26
nipi-4	miR-795	161	-20.31
nipi-4	miR-241	157	-23.17
nipi-4	miR-268	164	-26.58
nspd-3	miR-800	172	-20.31
nspd-3	miR-232	157	-23.91
pqn-26	miR-8190	163	-21.72
pqn-94	miR-42	168	-23.95
pqn-94	miR-42	164	-25.46
prx-11	miR-800	163	-22.74
prx-11	miR-1019	180	-25.05
R04B5.6	miR-2215	178	-26.17
rbc-1	miR-796	161	-20.52
rrc-1	miR-237	166	-25.39
spe-6	miR-5548	154	-23.6
sre-48	miR-5594	196	-31.01
srh-192	miR-5553	150	-22.69
srx-41	miR-784	158	-22.22
str-224	miR-8202	158	-22.68
str-224	miR-37	154	-25.46
T05F1.11	miR-81	154	-21.78
T06D8.3	miR-71	164	-25.8
T06G6.3b	miR-39	171	-22.18
T08G3.7	miR-789-2	166	-22
T09B4.6	miR-229	159	-20.19
T10B5.8	miR-1830	175	-22.77
T10B9.9	miR-55	150	-21.38
T10B9.9	miR-272	158	-21.58
T10E9.4.2	miR-8194	178	-22.35
T10E9.4.2	miR-5594	175	-23.03
T10E9.4.2	miR-4935	150	-25.07
T19C4.24	miR-8202	163	-22.26
T21D12.11	miR-34	155	-21.15
T24C4.3	miR-4934	150	-21.69
T26G10.8	miR-49	158	-20.36
tat-2	miR-55	152	-20.12
tkr-1	miR-244	168	-20.63
tkr-1	miR-35	155	-20.64
tkr-1	miR-60	188	-28.8
toe-4	miR-265	152	-26.32
unc-24	miR-265	156	-21.91
unc-24	miR-44	155	-25.31
unc-24	miR-2217a	157	-26.79
unc-24	miR-2217b	157	-27.16
unc-24	miR-45	159	-27.91
unc-75	miR-271	152	-23.87
VB0395L.1	miR-2217b-1	157	-27.09
W10D9.1	miR-38	155	-20.14
W10D9.1	miR-81	153	-23.34
W10D9.1	miR-61	158	-25.5
Y105E8A.8	miR-271	153	-22.41
Y17D7C.6a	miR-5593	154	-21.18
Y37B11A.3	miR-358	151	-21.32
Y37B11A.3	miR-358	152	-21.53
Y37B11A.3	miR-358	151	-22.76
Y37B11A.3	miR-73	159	-25.21
Y37B11A.3	miR-1822	172	-25.22
Y37F4.7	miR-8195	150	-22.58
Y37H9A.2	miR-4934	153	-23.13
Y37H9A.2	miR-41	167	-23.3
Y43F8B.18	miR-77	167	-22.08
Y43F8B.18	miR-80	169	-24.5
Y43F8B.18	miR-240	165	-25.28
Y45F10B.59	miR-8211	150	-20.64
Y47G6A.15	miR-4934	153	-22.34
Y47G6A.15	miR-47	174	-23.21
Y48G10A.2a	miR-36	165	-22.38
Y52B11A.11	miR-1822	167	-21.92
Y54E2A.5	miR-8210	152	-21.78
Y54G11A.19	miR-8194	170	-21.45
Y54G11A.19	miR-2217b-1	160	-31.05
Y66H1A.5	miR-4812	166	-21.47
Y73B6BL.22	miR-2215	150	-21.08
Y75B8A.10	miR-8190	175	-20.84
Y75B8A.10	miR-800	162	-21.96
Y81B9A.2	miR-42	156	-23.98
Y81B9A.2	miR-354	151	-26.47
Y8A9A.2	miR-41	161	-24.06
Y95B8A.12b	miR-2217b	152	-27.26
Y95B8A.12b	miR-2217a	151	-29.4
ZK1055.5	miR-268	152	-21.34
ZK1055.5	miR-5595	170	-22.05
ZK1055.5	miR-267	160	-22.14
ZK1098.3	miR-4805	169	-22.19
ZK1240.8	miR-36	153	-21.86
ZK418.13	miR-8205	155	-22.94
ZK863.1	miR-2209c	160	-20.63
ZK863.1	miR-788	151	-23.98
ZK863.1	miR-74	164	-26.86
ztf-11	miR-4936	171	-22.01
