# Supplementary material for: The C. elegans 3′ UTRome v2 resource for studying mRNA cleavage and polyadenylation, 3′-UTR biology, and miRNA targeting
Source: HighWire-hosted journal article supplement (doi:10.1101/gr.254839.119), 2019-11-19
Supplement: Supplemental_Table_S4.xlsx [file Supplemental_Table_S4.xlsx]

## Sheet: Genes with no 3'UTRs data
gene	cosmid	chr	strand	description
aat-7	F54D12.3	II	+	aat-7 encodes a predicted amino acid transporter catalytic subunit; unlike catalytic subunits in other organisms, however, AAT-7 does not contain the highly conserved cysteine residue known to facilitate covalent interaction with a glycoprotein subunit, suggesting that AAT-7 does not require this residue for heterodimer formation or alternatively, does not require the glycoprotein subunit for fun…
abf-1	C50F2.9	I	-	The abf-1 gene encodes a homolog of the antibacterial factor ASABF from Ascaris suum; it is closely related to abf-2.
abf-3	F54B8.5	V	-	abf-3 encodes a homolog of the antibacterial factor ASABF from Ascaris suum; ABF-3 may play a role in innate immunity, though at present the only evidence for its having an antimicrobial humoral function is its sequence similarity.
abf-4	Y38H6C.22	V	-	abf-4 encodes a homolog of the antibacterial factor ASABF from Ascaris suum; ABF-4 may play a role in innate immunity, though at present the only evidence for its having an antimicrobial humoral function is its sequence similarity.
abhd-11.1	F32B4.6	I	+	none available
abt-5	Y53C10A.9	I	+	abt-5 encodes a predicted ATP-binding cassette (ABC) transporter that is a member of the ABCA subfamily of transport proteins; ABT-5 is predicted to function as a transmembrane protein that couples energy to transport of various molecules across membranes, but as loss of abt-5 activity via RNAi results in no obvious defects, the precise role of abt-5 in C. elegans development and/or behavior is n…
abt-6	F56F4.6	I	-	F56F4.6 encodes a protein that contains an ATP-binding cassette (ABC) that is most closely related to that of the ABCA subfamily of ABC transport proteins; as the product of F56F4.6 lacks a predicted transmembrane domain, and as loss of F56F4.6 activity via RNAi results in no obvious defects, the precise role of this gene in C. elegans development and/or behavior is not yet known.
abu-1	AC3.3	V	-	abu-1 encodes a transmembrane protein with a predicted signal sequence, a glutamine/asparagine-rich domain and multiple cysteine-rich repeats (DUF139); abu-1 expression is induced by blockage of the endoplasmic reticulum unfolded protein response, and ABU-1 may help protect the organism from damage by improperly folded nascent protein; when expressed in COS1 cells, ABU-1 localizes to the endoplas…
abu-15	C03A7.4	V	+	The protein product of this gene is predicted to contain a glutamine/asparagine (Q/N)-rich ( prion ) domain, by the algorithm of Michelitsch and Weissman (as of the WS77 release of WormBase, i.e., in wormpep77).
abu-2	F19G12.7	X	-	abu-2 encodes a transmembrane protein with a predicted signal sequence, a glutamine/asparagine-rich domain and multiple cysteine-rich repeats (DUF139); abu-2 expression is induced by blockage of the unfolded-protein response in the endoplasmic reticulum, and ABU-2 may help protect the organism from damage by improperly folded nascent protein.
abu-3	F31A3.1	X	+	abu-3 encodes a transmembrane protein with a predicted signal sequence, a glutamine/asparagine-rich domain and multiple cysteine-rich repeats (DUF139); abu-3 expression is induced by blockage of the unfolded-protein response in the endoplasmic reticulum (ER), and ABU-3 may function within the ER to protect the organism from damage by improperly folded nascent protein; abu-3 expression is enhanced…
abu-4	Y5H2A.3	V	+	abu-4 encodes a transmembrane protein with a predicted signal sequence, a glutamine/asparagine-rich domain and multiple cysteine-rich repeats (DUF139); abu-4 expression is induced by blockage of the unfolded-protein response in the endoplasmic reticulum (ER), and ABU-4 may function within the ER to protect the organism from damage by improperly folded nascent protein; abu-4 expression is enhanced…
abu-5	Y105C5A.4	IV	+	abu-5 encodes a transmembrane protein with a predicted signal sequence, a glutamine/asparagine-rich domain and multiple cysteine-rich repeats (DUF139); abu-5 expression is induced by blockage of the unfolded-protein response in the endoplasmic reticulum (ER), and ABU-5 may function within the ER to protect the organism from damage by improperly folded nascent protein.
abu-6	C03A7.7	V	-	abu-6 encodes a transmembrane protein with a predicted signal sequence, a glutamine/asparagine-rich domain and multiple cysteine-rich repeats (DUF139); abu-6 is a member of a paralogous group of genes whose expression is transcriptionally up-regulated during times of cuticle synthesis, such as during late embryogenesis and during the molts; abu-6 expression is induced by blockage of the unfolded-…
abu-7	C03A7.8	V	-	abu-7 encodes a transmembrane protein with a predicted signal sequence, a glutamine/asparagine-rich domain and multiple cysteine-rich repeats (DUF139); abu-7 expression is induced by blockage of the unfolded-protein response in the endoplasmic reticulum, and ABU-7 may help protect the organism from damage by improperly folded nascent protein.
abu-9	R09F10.2	X	+	abu-9 encodes a transmembrane protein (identical to that predicted for the pqn-57 gene) with a predicted signal sequence, a glutamine/asparagine-rich domain and multiple cysteine-rich repeats (DUF139); abu-9 expression is induced by blockage of the unfolded-protein response in the endoplasmic reticulum, and ABU-9 may help protect the organism from damage by improperly folded nascent protein.
AC3.12	AC3.12	V	-	none available
AC7.3	AC7.3	IV	+	none available
AC8.10	AC8.10	X	-	none available
AC8.3	AC8.3	X	-	none available
acbp-4	F56C9.5	III	-	acbp-4 encodes a highly conserved protein containing a functional acyl-CoA-binding binding domain required for protein stability and ligand binding; loss of ACBP-4 results in 35-40% reduction in lipid chain unsaturation; ACBP-4::GFP weakly expressed and specifically localized to granular structures in intestine.
acc-2	C53D6.3	IV	+	none available
acd-4	F28A12.1	V	+	none available
acdh-5	C37A2.3	I	+	none available
acdh-6	C02D5.1	III	+	none available
acdh-8	K05F1.3	II	+	none available
ace-4	Y48B6A.7	II	+	ace-4 encodes an divergent acetylcholinesterase homolog with biochemically undetectable activity.
acox-2	F08A8.2	I	+	none available
acp-3	F14E5.3	II	-	none available
acr-10	R02E12.8	X	+	acr-10 encodes an alpha-7-like homomer-forming subunit of the nicotinic acetylcholine receptor (nAChR) superfamily which encode ligand-gated ion channels that regulate fast action of acetylcholine at neuromuscular junctions and in the nervous system; ACR-10 is a member of the ACR-16-like group of nAChR subunits.
acr-19	C31H5.3	I	-	acr-19 encodes a predicted member of the alpha subunit family of nicotinic acetylcholine receptors.
acr-2	K11G12.2	X	+	A homolog of a non-alpha type nicotinic acetylcholine receptor subunit that forms a functional channel when co-expressed with the unc-38 alpha subunit.
acr-20	R06A4.10	II	-	acr-20 encodes an alpha 7-like homomer-forming subunit of the nicotinic acetylcholine receptor (nAChR) superfamily which encode ligand-gated ion channels that regulate fast action of acetylcholine at neuromuscular junctions and in the nervous system; ACR-20 is a member of the DEG-3-like group of nAChR subunits which appears to be unique to nematodes.
acr-3	K11G12.7	X	+	acr-3 encodes a non-alpha subunit of the nicotinic acetylcholine receptor (nAChR) superfamily; ACR-3 functions as a ligand-gated ion channel that likely mediates fast actions of acetylcholine at neuromuscular junctions and in the nervous system; when coexpressed with UNC-38, an nAChR alpha subunit, the resulting hetero-oligomer can form levamisole-gated channels; ACR-3 is a member of the UNC-29-l…
acr-6	ZK973.5	I	+	acr-6 encodes a nicotinic acetylcholine receptor (nAChR) alpha subunit that is a member of the UNC-38 subgroup of C. elegans nAChRs; ACR-6 is thus predicted to function in regulation of fast neurotransmission.
acr-8	ZC504.2	X	+	acr-8 encodes an alpha subunit of nicotinic acetylcholine receptor (nAChR); ACR-8 falls into the ACR-8 class of nAChR subunits, which includes ACR-12 and ACR-13.
acr-9	C40C9.2	X	-	acr-9 encodes a predicted member of the alpha subunit family of nicotinic acetylcholine receptors.
acs-12	F25C8.4	V	+	none available
acs-15	R07C3.4	II	+	none available
agr-1	F41G3.12	II	-	agr-1 encodes a large (1396-residue) putative agrin, orthologous to human AGRIN (OMIM:103320), EGFLAM, and Q9NQ15; AGR-1 is expressed in buccal epithelium and deposited in pharyngeal basal epithelium; AGR-1 is also expressed in IL1 neurons, distal tip cells, and intestine; an AGR-1 fragment can cluster vertebrate dystroglycan in cell culture; agr-1(eg1770) mutations show no obvious phenotype, inc…
AH10.2	AH10.2	V	+	none available
AH10.3	AH10.3	V	-	none available
AH10.4	AH10.4	V	-	none available
AH6.17	AH6.17	II	+	none available
AH9.4	AH9.4	X	-	none available
alh-2	K04F1.15	V	+	none available
angl-1	W02G9.5	V	+	angl-1 encodes a deadenylase that is orthologous to members of the Angel family of ribonucleases.
ani-3	Y43F8C.14	V	+	ani-3 encodes one of three C. elegans anillins.
ant-1.2	W02D3.6	I	-	ant-1.2 encodes an ortholog of the human adenine nucleotide translocase ANT genes, the other ANT genes in C. elegans include ant-1.1, ant-1.3 and ant-1.4; by homology, ANT-1.2 is predicted to mediate the exchange of ATP generated in the mitochondria for cytosolic ADP; ANT-1.2 GFP fusion protein is expressed in the seam cells in the larval stage, and in intestine, pharynx and head neurons througho…
ant-1.4	T01B11.4	IV	-	ant-1.4 encodes an ortholog of the human adenine nucleotide translocase ANT genes, the other ANT genes in C. elegans include ant-1.1, ant-1.2 and ant-1.3; phylogenetic analysis indicates that ant-1.4 is specific to C. elegans, resulting from a recent duplication following the speciation of the common ancestor of C. elegans, C. briggsae, and C. remanei; by homology, ANT-1.4 is predicted to mediate…
apc-17	C09H10.7	II	+	none available
apc-2	K06H7.6	III	+	apc-2 encodes an ortholog of subunit 2 of anaphase-promoting complex (APC, a cyclin-specific E3 RING ubiquitin ligase); APC-2 and S. cerevisiae s Apc2p have 32% identity in their cullin domains (considered crucial for function), but otherwise share no obvious similarity; inactivating apc-2 with RNAi causes embryos to arrest at the meiotic one-cell stage, implying that APC-2 is required for the me…
apt-9	W04G3.4	X	+	apt-9 gene encodes an ortholog of GGA (Golgi-localizing, gamma-adaptin ear homology, ARF-binding protein), which contains a domain paralogous to the gamma-adaptin subunits of adaptor protein complexes; based on structural similarity, APT-9 may beinvolved in the formation of intracellular transport vesicles.
aptf-1	K06A1.1	II	+	aptf-1 encodes one of four C. elegans AP-2-like transcription factors; APTF-1 activity is required in the RIS interneuron for sleep-like quiescence induced by neuropeptide signaling; aptf-1 is expressed in five head interneurons.
aqp-5	C35A5.1	V	+	aqp-5 encodes a putative aquaporin with no known substrate, since AQP-5 expressed in Xenopus oocytes has no effect on water, glycerol, or urea permeability; AQP-5 also has no function in mass RNAi assays, perhaps reflecting genetic redundancy with its paralogs AQP-4 and AQP-6; AQP-5 is expressed in I1 and I2 pharyngeal interneurons, and is orthologous to human AQP8 (OMIM:603750).
arrd-16	Y49E10.24	III	+	none available
arrd-24	F48F7.7	X	-	none available
arrd-27	F48F7.8	X	+	none available
arrd-28	F21A10.4	X	+	none available
arrd-5	ZK938.4	II	+	none available
asg-2	C53B7.4	X	+	asg-2 encodes a homolog of subunit G of the membrane-bound F0 proton channel portion of ATP synthase (mitochondrial respiratory chain [MRC] complex V); asg-2 activity is required for growth at a normally high rate and for normal osmoregulation; in addition, asg-2 activity is required for response to hermaphrodite contact, the first step in a series of stereotypical male mating behaviors; an ASG-2…
asic-1	ZK770.1	I	+	none available
asp-15	Y39B6A.22	V	-	none available
asp-16	Y39B6A.23	V	-	none available
asp-18	ZK384.3	V	-	none available
asp-19	ZK384.6	V	-	none available
asp-7	F59D6.2	V	+	none available
asp-9	C11D2.2	IV	+	none available
atg-2	M03A8.2	X	+	atg-2 encodes a large (2,275-residue) protein orthologous to the autophagic budding yeast protein Atg2p, and to human ATG2A and ATG2B; ATG-2 is expressed in larval and adult pharynx, intestine, body wall muscles, and neurons, as well as adult reproductive system; ATG-2 has no obvious phenotype in mass RNAi assays.
atp-6	MTCE.12	MtDN	+	The atp-6 gene resides on the mitochondrial chromosome, and encodes the protein ATP synthase subunit a; this is the C. elegans homolog of the MT-ATP6 mitochondrial membrane ATP synthase (Complex V).
B0034.2	B0034.2	II	-	none available
B0034.5	B0034.5	II	-	none available
B0034.7	B0034.7	II	+	B0034.7 is a predicted gene that can encode a small, novel protein that has similarity to a predicted C. remanei protein and to a region of a hypothetical protein from the anammox bacterium Candidatus Kuenenia stuttgartiensis.
B0041.1	B0041.1	I	+	none available
B0205.5	B0205.5	I	+	none available
B0207.1	B0207.1	I	+	none available
B0207.11	B0207.11	I	-	B0207.11 encodes a nematode-specific protein probably required for a normally high ovulation rate; B0207.11 has no obvious non-nematode homologs, but does have a putative N-terminal coiled-coil domain and an SH2 motif, and is is paralogous to four other C. elegans proteins (F42G4.6, F44F4.10, T08G11.2, and Y81G3A.1); B0207.11(tm322) hermaphrodites show abnormal egg-laying, retaining significantly…
B0207.5a	B0207.5	I	+	none available
B0207.8	B0207.8	I	-	none available
B0218.5	B0218.5	IV	-	none available
B0218.7	B0218.7	IV	-	none available
B0222.10	B0222.10	V	+	none available
B0222.11	B0222.11	V	-	B0222.11 encodes a novel protein with a predicted signal sequence that is highly conserved amongst other Caenorhabditis species.
B0222.15	B0222.15	V	-	none available
B0228.8	B0228.8	II	-	none available
B0228.9	B0228.9	II	-	none available
B0238.15	B0238.15	V	+	none available
B0238.7	B0238.7	V	-	none available
B0244.11	B0244.11	III	+	none available
B0244.15	B0244.15	III	+	none available
B0244.6	B0244.6	III	+	none available
B0244.7	B0244.7	III	+	none available
B0244.9	B0244.9	III	-	none available
B0252.5	B0252.5	II	-	none available
B0261.5	B0261.5	I	-	none available
B0280.11	B0280.11	III	-	none available
B0280.7	B0280.7	III	-	none available
B0281.1	B0281.1	II	+	none available
B0281.4	B0281.4	II	-	none available
B0281.6	B0281.6	II	-	none available
B0285.6	B0285.6	III	+	B0285.6 encodes a predicted sodium-coupled carboxylate transporter that is one of four C. elegans proteins related to Drosophila Indy and the mammalian NaDC1 and NaDC3 transporters; B0285.6::lacZ reporter fusions are expressed in the excretory cell, from early larval stages through adulthood, with some later expression occasionally seen in two large unidentified structures on the dorsal side of t…
B0294.3	B0294.3	X	+	This gene encodes a protein containing an F-box, a motif predicted to mediate protein-protein interactions either with homologs of yeast Skp-1p or with other proteins.
B0302.2	B0302.2	X	+	none available
B0302.4	B0302.4	X	-	none available
B0334.10	B0334.10	II	+	none available
B0334.13	B0334.13	II	+	none available
B0334.20	B0334.20	II	-	none available
B0348.1	B0348.1	V	+	none available
B0348.10	B0348.10	V	-	none available
B0353.1b	B0353.1	III	+	none available
B0361.11	B0361.11	III	+	none available
B0361.4	B0361.4	III	+	none available
B0379.6	B0379.6	I	+	none available
B0391.3	B0391.3	V	-	none available
B0393.7	B0393.7	III	-	none available
B0393.8	B0393.8	III	-	none available
B0410.1	B0410.1	X	+	none available
B0416.2	B0416.2	X	+	none available
B0432.11	B0432.11	II	-	none available
B0454.26	B0454.26	II	-	none available
B0454.8	B0454.8	II	-	none available
B0478.3	B0478.3	IV	-	none available
B0491.1	B0491.1	II	+	none available
B0496.1	B0496.1	IV	+	none available
B0496.2	B0496.2	IV	+	none available
B0496.6	B0496.6	IV	+	none available
B0507.5b	B0507.5	V	+	none available
B0511.17	B0511.17	I	+	none available
B0513.90	B0513.90	IV	+	none available
B0524.3	B0524.3	III	+	none available
B0524.4	B0524.4	III	-	none available
B0547.2	B0547.2	IV	+	none available
B0554.1	B0554.1	V	+	none available
B0554.2	B0554.2	V	+	none available
B0554.4	B0554.4	V	+	none available
B0554.7a	B0554.7	V	-	none available
B0563.18	B0563.18	X	+	none available
bah-1	ZK1025.7	I	+	bah-1 encodes a protein with a DUF23 domain, a domain found in insects, plants, bacteria and two vertebrates, the frog and the fish, Tetraodon, but absent from mammalian genomes; bah-1 normally functions to contribute to the integrity of the nematode cuticle; bah-1 is also required for the surface characteristics of the elegans cuticle that are required for the binding of bacterial biofilms; bah-…
bath-21	F59H6.8	II	-	none available
bath-25	T27C10.4	I	+	none available
bath-34	W02A11.5	I	+	none available
bath-35	W02A11.8	I	+	none available
bath-36	Y75B12B.4	V	+	none available
bath-46	T07H3.2	II	+	none available
BE0003N10.	BE0003N10.3	III	-	none available
BE10.1	BE10.1	III	-	none available
best-12	F14H3.2	V	+	none available
best-2	B0564.4	IV	-	none available
best-25	ZK849.4	I	+	none available
best-26	ZK849.5	I	+	none available
best-6	C09B9.3	IV	-	none available
bli-5	F45G2.5	III	-	bli-5 encodes a protease inhibitor that affects the integrity of the cuticle and the development of the bursa in the adult male.
bnc-1	F55C5.11	V	-	none available
btb-15	C08E3.2	II	+	none available
btb-18	F39E9.12	II	+	none available
btb-5	W05G11.5	III	-	none available
bus-1	R03H4.6	V	-	bus-1 encodes an integral membrane O-acyltransferase; bus-1 mutants are resistant to colonization by Microbacterium nematophilum; a bus-1::GFP reporter fusion is expressed in rectal cells from late embryogenesis through adulthood with some adjacent neurons as well as two head neurons, probably amphidial, also showing expression.
bus-12	JC8.12	IV	+	bus-12 encodes a predicted nucleotide-sugar transporter and is most similar to sqv-7 within the elegans genome, which encodes a protein that can transport UDP-glucuronic acid, UDP-N acetylgalactosamine, and UDP-galactose, when expressed in yeast cells, and UDP-galactose when expressed in canine cells; bus-12 mutants show little or no infection when grown in the presence of the nematode-specific p…
C01B10.44	C01B10.44	IV	+	none available
C01B7.3	C01B7.3	V	-	none available
C01B7.5	C01B7.5	V	-	C01B7.5 encodes a PDZ domain-containing protein conserved amongst nematodes.
C01B7.7	C01B7.7	V	-	none available
C01B9.4	C01B9.4	II	-	none available
C01C4.2	C01C4.2	X	+	none available
C01G10.1	C01G10.1	V	+	none available
C01G10.15	C01G10.15	V	-	none available
C01G10.18	C01G10.18	V	-	none available
C01G10.6	C01G10.6	V	+	C01G10.6 encodes a predicted secreted or transmembrane protein that is rich in asparagine and tyrosine residues and which displays some similarity to the Staphylococcal secretory antigen ssaA2 precursor and Saccharomyces cerevisiae Var1p, a mitochondrially encoded ribosomal protein.
C01G12.13	C01G12.13	II	+	none available
C01G12.9	C01G12.9	II	+	none available
C01G5.3	C01G5.3	IV	+	none available
C01G5.4a	C01G5.4	IV	+	none available
C01G5.7b	C01G5.7	IV	+	none available
C02B10.6	C02B10.6	IV	+	none available
C02B4.3	C02B4.3	X	-	none available
C02E7.10	C02E7.10	V	-	none available
C02E7.8	C02E7.8	V	-	none available
C02F12.9	C02F12.9	X	+	none available
C02F4.5	C02F4.5	IV	-	none available
C02F5.2	C02F5.2	III	+	none available
C02G6.3	C02G6.3	V	+	none available
C02H6.1	C02H6.1	V	-	none available
C02H6.3	C02H6.3	V	-	none available
C03A7.13	C03A7.13	V	-	none available
C03A7.2	C03A7.2	V	+	none available
C03B1.1	C03B1.1	X	+	none available
C03B1.3	C03B1.3	X	+	none available
C03B1.4	C03B1.4	X	+	none available
C03B1.5	C03B1.5	X	+	none available
C03B1.6a	C03B1.6	X	+	none available
C03B1.7a	C03B1.7	X	+	none available
C03B1.9	C03B1.9	X	-	none available
C03C10.5	C03C10.5	III	-	none available
C03C10.7	C03C10.7	III	+	none available
C03C11.1	C03C11.1	I	+	none available
C03E10.1	C03E10.1	V	+	none available
C03F11.2	C03F11.2	X	-	none available
C03G5.14	C03G5.14	X	+	none available
C03G6.21	C03G6.21	V	-	none available
C03G6.6	C03G6.6	V	+	none available
C03H5.9	C03H5.9	II	+	none available
C04B4.5	C04B4.5	X	-	C04B4.5 encodes a novel protein.
C04B4.6	C04B4.6	X	-	none available
C04C3.4	C04C3.4	IV	+	none available
C04C3.6	C04C3.6	IV	-	none available
C04C3.7	C04C3.7	IV	-	none available
C04C3.9	C04C3.9	IV	-	none available
C04E12.10	C04E12.10	V	-	none available
C04E12.6	C04E12.6	V	-	none available
C04E6.3	C04E6.3	V	+	none available
C04E6.4	C04E6.4	V	+	none available
C04E6.5	C04E6.5	V	+	none available
C04E7.1	C04E7.1	X	+	none available
C04E7.3	C04E7.3	X	-	none available
C04F12.12	C04F12.12	I	-	none available
C04F5.2	C04F5.2	V	-	none available
C04G6.10	C04G6.10	II	+	none available
C04G6.11	C04G6.11	II	-	none available
C04G6.13	C04G6.13	II	+	none available
C04G6.2	C04G6.2	II	+	none available
C04G6.7	C04G6.7	II	-	none available
C04H4.1	C04H4.1	II	+	none available
C04H5.7a	C04H5.7	II	+	none available
C05A2.4	C05A2.4	V	+	none available
C05B5.1	C05B5.1	III	-	none available
C05B5.11	C05B5.11	III	+	none available
C05B5.12	C05B5.12	III	+	none available
C05B5.16	C05B5.16	III	+	none available
C05C9.2	C05C9.2	X	+	none available
C05E11.2	C05E11.2	X	+	none available
C05E11.7	C05E11.7	X	-	none available
C05E4.12	C05E4.12	V	-	none available
C05E7.2	C05E7.2	X	-	none available
C06A1.6	C06A1.6	II	-	none available
C06A1.7	C06A1.7	II	+	none available
C06A12.8	C06A12.8	IV	+	none available
C06B3.1	C06B3.1	V	+	none available
C06B3.16	C06B3.16	V	+	none available
C06B8.11	C06B8.11	V	-	none available
C06C3.12	C06C3.12	II	+	none available
C06C3.3	C06C3.3	II	-	none available
C06C6.1	C06C6.1	V	-	none available
C06C6.6	C06C6.6	V	+	none available
C06E1.11	C06E1.11	III	-	none available
C06E2.2	C06E2.2	X	+	none available
C06E4.1	C06E4.1	IV	+	none available
C06E8.5	C06E8.5	III	-	none available
C06G1.6	C06G1.6	X	-	none available
C06G4.4.1	C06G4.4	III	-	none available
C06G4.6	C06G4.6	III	+	none available
C06H5.11	C06H5.11	V	-	none available
C06H5.12	C06H5.12	V	+	none available
C06H5.13	C06H5.13	V	-	none available
C07A4.3	C07A4.3	X	+	none available
C07A9.10	C07A9.10	III	-	none available
C07A9.13	C07A9.13	III	-	none available
C07B5.2	C07B5.2	X	-	none available
C07B5.3	C07B5.3	X	-	none available
C07C7.3	C07C7.3	IV	+	none available
C07D10.6	C07D10.6	II	+	none available
C07D8.5	C07D8.5	X	+	none available
C07E3.4	C07E3.4	II	+	none available
C07F11.2	C07F11.2	I	+	none available
C07G1.6	C07G1.6	IV	-	none available
C07G1.7	C07G1.7	IV	-	none available
C08A9.3b	C08A9.3	X	-	none available
C08A9.8	C08A9.8	X	-	none available
C08B6.11	C08B6.11	V	+	none available
C08B6.14	C08B6.14	V	-	none available
C08B6.2a	C08B6.2	V	+	none available
C08B6.5	C08B6.5	V	+	none available
C08B6.6	C08B6.6	V	+	none available
C08E3.15	C08E3.15	II	-	none available
C08E8.1.1	C08E8.1	V	-	none available
C08E8.11	C08E8.11	V	+	none available
C08E8.5	C08E8.5	V	-	none available
C08E8.6	C08E8.6	V	-	none available
C08E8.9	C08E8.9	V	+	none available
C08F1.8	C08F1.8	II	-	none available
C08F11.17	C08F11.17	IV	-	none available
C08F8.15	C08F8.15	IV	-	none available
C08G5.1	C08G5.1	II	-	none available
C08H9.1	C08H9.1	II	+	none available
C08H9.18	C08H9.18	II	-	none available
C09B8.3	C09B8.3	X	-	none available
C09B9.1	C09B9.1	IV	+	none available
C09B9.2	C09B9.2	IV	+	none available
C09B9.4	C09B9.4	IV	-	none available
C09B9.7	C09B9.7	IV	-	none available
C09E7.5	C09E7.5	III	-	none available
C09F9.1	C09F9.1	II	+	none available
C09F9.2	C09F9.2	II	+	none available
C09G1.2	C09G1.2	X	-	none available
C09G12.17	C09G12.17	IV	-	none available
C09G12.5	C09G12.5	IV	+	none available
C09G9.3b	C09G9.3	IV	-	none available
C09H10.4	C09H10.4	II	+	none available
C09H10.9	C09H10.9	II	+	none available
C09H5.1	C09H5.1	V	+	none available
C09H5.7	C09H5.7	V	-	none available
C10A4.2	C10A4.2	X	+	none available
C10A4.7	C10A4.7	X	-	none available
C10C6.13	C10C6.13	IV	-	none available
C10C6.3a	C10C6.3	IV	-	none available
C10E2.5	C10E2.5	X	-	none available
C10F3.7	C10F3.7	V	-	none available
C10G11.10	C10G11.10	I	-	none available
C10G11.1b	C10G11.1	I	+	none available
C10G8.2	C10G8.2	V	+	none available
C10G8.3	C10G8.3	V	+	none available
C10H11.7	C10H11.7	I	+	none available
C11E4.8	C11E4.8	X	+	none available
C11G10.2	C11G10.2	X	-	none available
C11H1.5	C11H1.5	X	-	none available
C11H1.8	C11H1.8	X	-	none available
C12D12.4	C12D12.4	X	-	none available
C12D5.10	C12D5.10	V	-	none available
C12D5.3	C12D5.3	V	+	none available
C12D5.4	C12D5.4	V	+	none available
C12D5.5	C12D5.5	V	+	none available
C12D5.9	C12D5.9	V	-	none available
C12D8.13	C12D8.13	V	-	none available
C12D8.15	C12D8.15	V	-	none available
C12D8.20	C12D8.20	V	+	none available
C12D8.21b	C12D8.21	V	-	none available
C12D8.9a	C12D8.9	V	-	none available
C13A2.10	C13A2.10	V	-	none available
C13A2.11	C13A2.11	V	-	none available
C13A2.2	C13A2.2	V	+	none available
C13A2.3	C13A2.3	V	+	none available
C13A2.4.2	C13A2.4	V	+	none available
C13A2.5	C13A2.5	V	+	none available
C13A2.6	C13A2.6	V	+	none available
C13A2.7b	C13A2.7	V	+	none available
C13A2.9	C13A2.9	V	-	none available
C13C12.2	C13C12.2	V	-	none available
C13C4.8	C13C4.8	V	+	none available
C13F10.5	C13F10.5	V	-	none available
C14A4.8	C14A4.8	II	-	none available
C14A4.9	C14A4.9	II	+	none available
C14A6.12	C14A6.12	V	-	none available
C14A6.13	C14A6.13	V	-	none available
C14A6.3	C14A6.3	V	+	none available
C14A6.5	C14A6.5	V	-	none available
C14A6.6	C14A6.6	V	-	none available
C14A6.7	C14A6.7	V	-	none available
C14A6.8	C14A6.8	V	-	none available
C14C6.3	C14C6.3	V	+	none available
C14C6.6	C14C6.6	V	-	none available
C14E2.1	C14E2.1	X	+	none available
C14E2.3	C14E2.3	X	-	none available
C14E2.4	C14E2.4	X	-	none available
C14E2.5	C14E2.5	X	-	none available
C14E2.7	C14E2.7	X	+	none available
C14F11.7	C14F11.7	X	-	none available
C14H10.2b.	C14H10.2	X	-	none available
C15B12.2	C15B12.2	X	+	none available
C15B12.3	C15B12.3	X	-	none available
C15B12.9	C15B12.9	X	+	none available
C15C7.6	C15C7.6	X	-	none available
C15C8.5	C15C8.5	V	+	none available
C15C8.6	C15C8.6	V	-	none available
C15C8.8	C15C8.8	V	-	none available
C15H11.10	C15H11.10	V	+	none available
C15H11.13	C15H11.13	V	+	none available
C15H7.4	C15H7.4	III	-	none available
C16A3.5.2	C16A3.5	III	+	none available
C16C10.9	C16C10.9	III	-	none available
C16C4.1	C16C4.1	II	+	none available
C16C8.10	C16C8.10	II	-	none available
C16C8.18	C16C8.18	II	+	none available
C16C8.19	C16C8.19	II	+	none available
C16C8.7	C16C8.7	II	-	none available
C16C8.8	C16C8.8	II	-	none available
C16C8.9	C16C8.9	II	-	none available
C16D2.3	C16D2.3	II	+	none available
C16D6.1	C16D6.1	X	-	none available
C16D6.3	C16D6.3	X	+	none available
C16D9.5	C16D9.5	V	-	none available
C16D9.8	C16D9.8	V	-	none available
C16E9.1	C16E9.1	X	+	none available
C17A2.2	C17A2.2	II	+	none available
C17A2.3	C17A2.3	II	+	none available
C17A2.4	C17A2.4	II	+	none available
C17A2.7	C17A2.7	II	-	none available
C17B7.10	C17B7.10	V	-	C17B7.10 encodes a neprilysin; neprilysins are thermolysin-like zinc metallopeptidases, found on the outer surface of animal cells, that negatively regulate small signalling peptides (e.g., enkephalin, tachykinin, insulin, and natriuretic peptides) by cleaving them; C17B7.10 has no clear orthologs in other organisms.
C17B7.12	C17B7.12	V	+	none available
C17B7.14	C17B7.14	V	-	none available
C17B7.2	C17B7.2	V	+	none available
C17B7.5	C17B7.5	V	+	none available
C17B7.8b	C17B7.8	V	-	C17B7.8 encodes a neprilysin; neprilysins are thermolysin-like zinc metallopeptidases, found on the outer surface of animal cells, that negatively regulate small signalling peptides (e.g., enkephalin, tachykinin, insulin, and natriuretic peptides) by cleaving them; C17B7.8 has no clear orthologs in other organisms.
C17B7.9	C17B7.9	V	-	none available
C17C3.11.1	C17C3.11	II	+	none available
C17C3.13	C17C3.13	II	-	none available
C17C3.2	C17C3.2	II	+	none available
C17C3.24.2	C17C3.24	II	-	none available
C17C3.6	C17C3.6	II	+	This gene encodes a protein containing an F-box, a motif predicted to mediate protein-protein interactions either with homologs of yeast Skp-1p or with other proteins.
C17C3.9	C17C3.9	II	-	none available
C17D12.3	C17D12.3	I	-	none available
C17D12.9	C17D12.9	I	-	none available
C17E4.19	C17E4.19	I	+	none available
C17E4.4	C17E4.4	I	+	none available
C17E7.13	C17E7.13	V	-	none available
C17E7.4	C17E7.4	V	+	none available
C17F3.3	C17F3.3	I	+	none available
C17F4.11	C17F4.11	II	+	none available
C17F4.12	C17F4.12	II	-	none available
C17F4.3	C17F4.3	II	+	none available
C17G1.1	C17G1.1	X	+	none available
C17G1.14	C17G1.14	X	+	none available
C17G10.10	C17G10.10	II	-	none available
C17G10.3	C17G10.3	II	+	none available
C17G10.6a	C17G10.6	II	-	none available
C17H11.4	C17H11.4	X	-	none available
C18A11.6	C18A11.6	X	-	none available
C18A3.11	C18A3.11	II	+	none available
C18A3.9	C18A3.9	II	+	none available
C18B12.1	C18B12.1	X	+	none available
C18B2.1	C18B2.1	X	+	none available
C18C4.7	C18C4.7	V	-	none available
C18D1.2	C18D1.2	II	+	none available
C18D11.10	C18D11.10	III	+	none available
C18D4.3	C18D4.3	V	-	none available
C18D4.4a	C18D4.4	V	-	none available
C18E3.4	C18E3.4	I	+	none available
C18E9.8	C18E9.8	II	-	C18E9.8 is orthologous to the human gene JOINED TO JAZF1 (JJAZ1; OMIM:606245), which when mutated leads to disease.
C18F10.2	C18F10.2	III	+	none available
C18F10.9	C18F10.9	III	+	none available
C18G1.3a	C18G1.3	V	+	none available
C18G1.6.2	C18G1.6	V	+	none available
C18G1.7	C18G1.7	V	+	none available
C18G1.8	C18G1.8	V	-	none available
C18G1.9	C18G1.9	V	-	none available
C18H2.5	C18H2.5	III	-	none available
C18H7.12	C18H7.12	IV	-	none available
C18H7.1a	C18H7.1	IV	+	none available
C18H7.5	C18H7.5	IV	+	none available
C18H7.6	C18H7.6	IV	-	none available
C18H7.7.2	C18H7.7	IV	-	none available
C18H9.1	C18H9.1	II	+	none available
C23G10.10	C23G10.10	III	-	none available
C23H3.3b	C23H3.3	II	+	none available
C23H5.11b	C23H5.11	IV	-	none available
C24A11.2	C24A11.2	I	+	none available
C24A11.5	C24A11.5	I	-	none available
C24A11.6	C24A11.6	I	-	none available
C24A3.1	C24A3.1	X	+	none available
C24A3.9	C24A3.9	X	-	none available
C24A8.5	C24A8.5	X	-	none available
C24D10.1	C24D10.1	IV	+	none available
C24D10.2.2	C24D10.2	IV	+	none available
C24D10.49	C24D10.49	IV	-	none available
C24H11.1	C24H11.1	III	+	none available
C24H11.2	C24H11.2	III	-	none available
C24H12.6	C24H12.6	II	-	none available
C25A1.15	C25A1.15	I	+	none available
C25A11.1.1	C25A11.1	X	+	none available
C25A8.1	C25A8.1	IV	+	none available
C25A8.2	C25A8.2	IV	+	none available
C25A8.5	C25A8.5	IV	+	none available
C25D7.16	C25D7.16	V	+	none available
C25D7.9	C25D7.9	V	+	none available
C25E10.11	C25E10.11	V	-	none available
C25E10.16	C25E10.16	V	-	none available
C25E10.17a	C25E10.17	V	-	none available
C25F6.6	C25F6.6	X	-	none available
C25F6.8	C25F6.8	X	+	none available
C25F9.13	C25F9.13	V	-	none available
C25F9.8	C25F9.8	V	+	none available
C25G4.17	C25G4.17	IV	+	none available
C25G4.8	C25G4.8	IV	-	none available
C25G6.1	C25G6.1	X	+	none available
C25G6.3	C25G6.3	X	-	none available
C25H3.11	C25H3.11	II	-	none available
C26B2.2	C26B2.2	IV	-	none available
C26B2.8	C26B2.8	IV	+	none available
C26B9.2	C26B9.2	X	+	none available
C26B9.7	C26B9.7	X	+	none available
C26C6.4a	C26C6.4	I	+	none available
C26D10.7	C26D10.7	II	+	C26D10.7 encodes a close paralog of EFF-1 (with 89% identity at the amino acid level) and a much more distant paralog of AFF-1 (with 27% identity) ; however, C26D10.7 has no known function, in mass RNAi assays or otherwise.
C26E6.1	C26E6.1	III	+	none available
C26H9A.3	C26H9A.3	IV	-	none available
C27A2.7	C27A2.7	II	-	none available
C27A2.8	C27A2.8	II	-	none available
C27A7.9	C27A7.9	V	-	none available
C27B7.6	C27B7.6	IV	-	none available
C27C7.5a	C27C7.5	I	-	none available
C27D6.11	C27D6.11	II	-	none available
C27D8.1	C27D8.1	IV	+	none available
C27D8.2	C27D8.2	IV	+	none available
C27D8.4	C27D8.4	IV	+	none available
C27F2.6	C27F2.6	III	-	none available
C28C12.3	C28C12.3	IV	+	none available
C28D4.4	C28D4.4	IV	-	none available
C28D4.5	C28D4.5	IV	-	none available
C28D4.7	C28D4.7	IV	-	none available
C28D4.8	C28D4.8	IV	-	none available
C28F5.1	C28F5.1	II	+	none available
C28F5.4	C28F5.4	II	-	none available
C28H8.8	C28H8.8	III	-	none available
C29A12.22	C29A12.22	V	+	none available
C29A12.6b	C29A12.6	V	+	none available
C29E4.14	C29E4.14	III	+	none available
C29E4.17	C29E4.17	III	+	none available
C29F3.3	C29F3.3	V	-	none available
C29F5.5	C29F5.5	II	-	none available
C29F5.8	C29F5.8	II	+	none available
C29F9.6.2	C29F9.6	III	+	none available
C29F9.8	C29F9.8	III	-	none available
C29F9.9	C29F9.9	III	-	none available
C29G2.2	C29G2.2	V	+	none available
C29G2.3	C29G2.3	V	+	none available
C30A5.16	C30A5.16	III	+	none available
C30E1.3	C30E1.3	X	+	none available
C30E1.4	C30E1.4	X	+	none available
C30E1.8	C30E1.8	X	-	none available
C30F2.2	C30F2.2	X	-	none available
C30F2.4	C30F2.4	X	-	none available
C30G7.5	C30G7.5	V	-	none available
C30H6.5a	C30H6.5	IV	+	none available
C31A11.13	C31A11.13	V	-	none available
C31B8.16	C31B8.16	V	+	none available
C31B8.2	C31B8.2	V	+	none available
C31B8.9	C31B8.9	V	-	none available
C31E10.4	C31E10.4	X	+	none available
C31G12.3	C31G12.3	V	+	none available
C31G12.4b	C31G12.4	V	-	none available
C31H1.1	C31H1.1	IV	+	none available
C31H2.3	C31H2.3	X	-	none available
C32B5.7c	C32B5.7	II	+	none available
C32D5.14	C32D5.14	II	+	none available
C32E8.1	C32E8.1	I	+	none available
C32E8.12	C32E8.12	I	-	none available
C32H11.11	C32H11.11	IV	+	none available
C32H11.3	C32H11.3	IV	+	none available
C32H11.5	C32H11.5	IV	-	none available
C32H11.6	C32H11.6	IV	-	none available
C32H11.8	C32H11.8	IV	-	none available
C33B4.2	C33B4.2	II	-	none available
C33B4.5	C33B4.5	II	+	none available
C33C12.1	C33C12.1	II	+	none available
C33C12.11	C33C12.11	II	-	none available
C33C12.12	C33C12.12	II	-	none available
C33D12.2	C33D12.2	X	-	C33D12.2 encodes a predicted transmembrane protein orthologous to human ACDP1-ACDP4 and S. cerevisiae MAM3, and paralogous to C01H6.6, C52D10.12, M02F4.3, R04E5.2, and R13G10.4; by orthology with MAM3, C33D12.2 may participate in metal homoeostasis; C33D12.2 is expressed in intestine, body wall muscle, nervous system (including ventral and dorsal nerve cords and head neurons), and adult vulval mu…
C33D3.4	C33D3.4	X	+	none available
C33D3.5	C33D3.5	X	+	none available
C33E10.5	C33E10.5	X	+	none available
C33E10.6	C33E10.6	X	+	none available
C33F10.12	C33F10.12	II	-	none available
C33G3.5	C33G3.5	X	-	none available
C33G8.13	C33G8.13	V	-	none available
C33H5.1	C33H5.1	IV	+	none available
C33H5.16	C33H5.16	IV	-	none available
C34B2.3	C34B2.3	I	+	none available
C34B2.4	C34B2.4	I	-	none available
C34B4.4	C34B4.4	V	+	none available
C34B4.5	C34B4.5	V	+	none available
C34C12.1	C34C12.1	III	+	none available
C34C6.2c	C34C6.2	II	-	none available
C34D10.1	C34D10.1	X	+	none available
C34D4.1	C34D4.1	IV	+	none available
C34D4.2	C34D4.2	IV	+	none available
C34E11.7	C34E11.7	X	+	none available
C34F11.1	C34F11.1	II	+	none available
C34F11.2	C34F11.2	II	+	none available
C34F11.5	C34F11.5	II	+	none available
C35A11.2	C35A11.2	V	+	none available
C35A11.3	C35A11.3	V	+	none available
C35A11.4	C35A11.4	V	-	none available
C35A5.10	C35A5.10	V	+	none available
C35A5.5	C35A5.5	V	+	none available
C35A5.6a	C35A5.6	V	+	none available
C35B1.3	C35B1.3	IV	+	none available
C35D10.3	C35D10.3	III	+	none available
C35D6.13a	C35D6.13	IV	+	none available
C35D6.3	C35D6.3	IV	+	none available
C36B7.1	C36B7.1	X	+	none available
C36B7.3	C36B7.3	X	+	none available
C36B7.5b	C36B7.5	X	-	none available
C36B7.8	C36B7.8	X	+	none available
C36C5.14	C36C5.14	V	-	none available
C36C5.15	C36C5.15	V	-	none available
C36C5.4b	C36C5.4	V	+	none available
C36C9.6	C36C9.6	X	-	none available
C37A5.5	C37A5.5	I	+	none available
C37A5.6	C37A5.6	I	-	none available
C37C3.10	C37C3.10	V	-	none available
C37C3.11	C37C3.11	V	-	none available
C37E2.3	C37E2.3	X	+	none available
C38C10.3	C38C10.3	III	-	none available
C38C5.1a	C38C5.1	X	+	none available
C38C6.3	C38C6.3	II	+	none available
C38C6.5	C38C6.5	II	-	none available
C39B10.1	C39B10.1	X	-	none available
C39B10.5	C39B10.5	X	+	none available
C39B10.7	C39B10.7	X	+	none available
C39B5.10	C39B5.10	III	-	none available
C39B5.14.1	C39B5.14	III	+	none available
C39B5.5	C39B5.5	III	+	none available
C39D10.1	C39D10.1	X	+	none available
C39D10.9	C39D10.9	X	-	none available
C39E6.2	C39E6.2	X	-	none available
C39F7.1b	C39F7.1	V	+	none available
C40C9.3	C40C9.3	X	+	none available
C40C9.4	C40C9.4	X	+	none available
C40H1.3	C40H1.3	III	-	none available
C40H1.7	C40H1.7	III	+	none available
C40H1.8.2	C40H1.8	III	+	none available
C40H5.7	C40H5.7	X	+	none available
C41C4.9	C41C4.9	II	+	none available
C41D11.10	C41D11.10	I	+	none available
C41D11.6	C41D11.6	I	-	none available
C41G6.12	C41G6.12	V	-	none available
C41G6.16	C41G6.16	V	-	none available
C41G7.15	C41G7.15	I	+	none available
C41G7.6	C41G7.6	I	-	none available
C41G7.7	C41G7.7	I	-	none available
C41G7.8	C41G7.8	I	-	none available
C41H7.2	C41H7.2	II	+	This gene encodes a protein containing an F-box, a motif predicted to mediate protein-protein interactions either with homologs of yeast Skp-1p or with other proteins; its encoded protein also contains a Pfam-B45 motif of presently unknown function.
C42C1.3a	C42C1.3	IV	-	none available
C42D8.9	C42D8.9	X	-	none available
C43D7.4	C43D7.4	V	-	none available
C43E11.5	C43E11.5	I	+	none available
C43F9.11b	C43F9.11	IV	+	none available
C43F9.4a	C43F9.4	IV	-	none available
C43F9.5	C43F9.5	IV	-	none available
C43H6.6	C43H6.6	X	+	none available
C44B12.9	C44B12.9	IV	-	none available
C44C10.10	C44C10.10	X	+	none available
C44C10.12	C44C10.12	X	+	none available
C44C10.15	C44C10.15	X	-	none available
C44C10.6	C44C10.6	X	+	none available
C44C11.6	C44C11.6	II	+	none available
C44H9.7b	C44H9.7	V	-	none available
C45B11.9	C45B11.9	V	+	none available
C45B2.3	C45B2.3	X	+	none available
C45E5.1	C45E5.1	IV	+	none available
C45G9.1	C45G9.1	III	+	none available
C45G9.10a	C45G9.10	III	-	none available
C45G9.11	C45G9.11	III	-	none available
C45G9.14	C45G9.14	III	+	none available
C45G9.15	C45G9.15	III	-	none available
C45H4.13	C45H4.13	V	-	none available
C45H4.14a	C45H4.14	V	-	none available
C45H4.21	C45H4.21	V	-	none available
C46A5.1	C46A5.1	IV	+	none available
C46A5.4	C46A5.4	IV	-	none available
C46E1.3	C46E1.3	X	-	none available
C46E10.1	C46E10.1	II	+	none available
C46E10.2	C46E10.2	II	+	none available
C46E10.3	C46E10.3	II	+	none available
C46E10.9	C46E10.9	II	-	none available
C46F4.3	C46F4.3	X	+	none available
C46G7.2	C46G7.2	IV	+	none available
C46H11.1	C46H11.1	I	+	none available
C46H11.3	C46H11.3	I	+	none available
C46H11.7	C46H11.7	I	-	none available
C46H3.3	C46H3.3	X	-	none available
C47A10.12	C47A10.12	V	+	none available
C47A10.16	C47A10.16	V	-	none available
C47A4.3	C47A4.3	IV	-	none available
C47A4.5	C47A4.5	IV	+	none available
C47B2.9	C47B2.9	I	+	none available
C47C12.2	C47C12.2	X	+	none available
C47E12.10b	C47E12.10	IV	+	none available
C47E12.11b	C47E12.11	IV	+	none available
C47E12.12	C47E12.12	IV	-	none available
C47E12.14	C47E12.14	IV	-	none available
C47E8.1	C47E8.1	V	+	none available
C47E8.9a	C47E8.9	V	+	none available
C47F8.3	C47F8.3	I	-	none available
C47F8.5	C47F8.5	I	+	none available
C47F8.7	C47F8.7	I	-	none available
C48B4.12a	C48B4.12	III	+	none available
C48B6.4	C48B6.4	I	+	none available
C48D1.5d	C48D1.5	IV	+	none available
C49A1.1	C49A1.1	I	+	none available
C49A1.5	C49A1.5	I	+	none available
C49A9.1	C49A9.1	IV	+	none available
C49C3.20	C49C3.20	IV	-	none available
C49C8.6	C49C8.6	IV	-	none available
C49D10.7	C49D10.7	II	+	none available
C49F5.5	C49F5.5	X	+	none available
C49F5.8	C49F5.8	X	+	none available
C49F8.1	C49F8.1	X	-	none available
C49G7.6	C49G7.6	V	+	none available
C50A2.7	C50A2.7	IV	+	none available
C50B6.1	C50B6.1	V	+	none available
C50C3.12	C50C3.12	III	+	none available
C50C3.19	C50C3.19	III	+	none available
C50D2.3	C50D2.3	II	+	none available
C50E10.2c	C50E10.2	II	-	none available
C50E3.15	C50E3.15	V	+	none available
C50E3.2	C50E3.2	V	+	none available
C50E3.8	C50E3.8	V	-	none available
C50F2.5	C50F2.5	I	-	none available
C50F7.5	C50F7.5	IV	+	none available
C50F7.9	C50F7.9	IV	-	none available
C50H11.13	C50H11.13	V	-	none available
C50H11.17	C50H11.17	V	-	none available
C50H2.7	C50H2.7	V	+	none available
C51E3.6	C51E3.6	V	-	none available
C52A11.3	C52A11.3	II	+	C52A11.3 encodes a PDZ domain-containing protein.
C52B11.4	C52B11.4	X	+	none available
C52E2.3	C52E2.3	II	+	none available
C52E4.12	C52E4.12	V	+	none available
C52E4.7	C52E4.7	V	+	C52E4.7 encodes a member of the histidine phosphatase superfamily orthologous to Bombyx mori ecdysteroid phosphate phosphatase (EPP), human STS1 (OMIM:609201) and human UBASH3A (OMIM:605736); C52E4.7 is also paralogous to C. elegans F09C12.8, F53B6.7, F55A11.11, and T07F12.1; while no explicit prediction has been made for C52E4.7 s activity, it might be catalytically inactive; as loss of C52E4.7 …
C52G5.3	C52G5.3	X	-	none available
C53A3.3	C53A3.3	V	+	none available
C53B4.1	C53B4.1	IV	+	none available
C53C11.4	C53C11.4	X	+	none available
C53D5.3	C53D5.3	I	+	none available
C53D6.10	C53D6.10	IV	-	none available
C53D6.8	C53D6.8	IV	-	none available
C54A12.3	C54A12.3	II	+	none available
C54C6.11	C54C6.11	III	+	none available
C54C6.4a	C54C6.4	III	+	none available
C54C8.2	C54C8.2	I	+	none available
C54C8.3	C54C8.3	I	-	none available
C54C8.4	C54C8.4	I	+	none available
C54D10.10	C54D10.10	V	-	none available
C54D10.4	C54D10.4	V	-	none available
C54D2.6	C54D2.6	X	-	none available
C54E10.1	C54E10.1	V	+	none available
C54E10.10	C54E10.10	V	-	none available
C54E10.3	C54E10.3	V	+	none available
C54E10.7	C54E10.7	V	+	none available
C54E10.8	C54E10.8	V	+	none available
C54E4.1	C54E4.1	IV	+	none available
C54F6.12	C54F6.12	V	-	none available
C54F6.19	C54F6.19	V	+	none available
C54F6.3	C54F6.3	V	+	none available
C54G4.2	C54G4.2	I	+	none available
C54G6.2	C54G6.2	I	+	The C54G6.2 gene encodes a homolog of human RP2, which when mutated leads to X-linked retinitis pigmentosa 2 (OMIM:312600).
C55A1.1	C55A1.1	V	+	none available
C55A1.11	C55A1.11	V	+	none available
C55A1.15	C55A1.15	V	-	none available
C55A1.7	C55A1.7	V	-	none available
C55A1.9	C55A1.9	V	+	none available
C55A6.10a	C55A6.10	V	+	none available
C55A6.11	C55A6.11	V	+	none available
C55B6.4	C55B6.4	X	-	none available
C55B6.5	C55B6.5	X	-	none available
C55B6.7	C55B6.7	X	-	none available
C55C2.3	C55C2.3	I	+	none available
C55C2.4	C55C2.4	I	+	none available
C55C3.7	C55C3.7	IV	-	none available
C55C3.8	C55C3.8	IV	+	none available
C55H1.1	C55H1.1	V	+	none available
C56A3.5	C56A3.5	V	+	none available
C56C10.6	C56C10.6	II	-	none available
C56E10.3a	C56E10.3	X	+	none available
C56E6.7	C56E6.7	II	+	none available
C56G7.2	C56G7.2	III	-	This gene encodes a protein containing an F-box, a motif predicted to mediate protein-protein interactions either with homologs of yeast Skp-1p or with other proteins.
cah-6	T28F2.3	I	+	cah-6 encodes a predicted carbonic anhydrase.
cal-7	F40F9.8	V	+	none available
cal-8	F12A10.5	II	-	none available
car-1	Y18D10A.17	I	+	car-1 encodes a putative RNA-binding protein orthologous to budding yeast Scd6p, fission yeast Sum2p, Drosophila TRAL, and human LSM14A and LSM14B; CAR-1 inhibits physiological apoptosis in oocytes, keeping it down to a normal level of ~50% in hermaphrodite gonads; independently of apoptosis, CAR-1 is also required for normal oogenesis, early embryonic cytokinesis, and normally organized endoplas…
catp-2	C02E7.1	V	+	none available
catp-4	C01G12.8	II	+	none available
CC8.3	CC8.3	IV	-	none available
ccpp-6	EEED8.6	II	-	ccpp-6 encodes an ATP/ADP-activated metallocarboxypeptidase, orthologous to mammalian AGBL4 proteins, that may function in vivo as an alpha-tubulin C-terminal tyrosine carboxypeptidase; recombinant CCPP-6 is active in vitro on several different C-terminal amino acids of synthetic peptide substrates (with carboxypeptidase A- and B-like, but not O-like specificity); unlike most carboxypeptidases, b…
CD4.5	CD4.5	V	+	none available
cdc-25.4	R05H5.2	II	-	a homolog of dual specificity phosphatase Cdc25.
cdh-7	R05H10.6	II	+	cdh-7 encodes a protein that contains a cadherin domain.
cdkl-1	Y42A5A.4	V	+	none available
cdr-1	F35E8.11	V	+	cdr-1 encodes a member of the cadmium-inducible lysosomal family that affects susceptibility to cadmium toxicity; expressed in intestinal cells.
cdr-3	C54D10.2	V	-	cdr-3 encodes a predicted transmembrane protein that is a member of the CDR (cadmium responsive) family of proteins; cdr-3 expression is increased upon exposure to cadmium ions.
ceh-12	F33D11.4	I	+	ceh-12 encodes a homeobox protein orthologous to human HLXB9 (OMIM:142994, mutated in Currarino syndrome) that is required for normal synaptic inputs to motor neurons VA2-VA10 (sisters to VB3-VB11); ceh-12 is expressed in VB motor neurons, but repressed in their VA siblings by UNC-4 and UNC-37; unc-4 or unc-37 mutants show ectopic CEH-12 expression in VA neurons, which is both necessary and suffi…
ceh-17	D1007.1	I	-	ceh-17 encodes a phox-2-like homeodomain protein that is a member of the Q50 paired-like class of homeobox proteins and the vertebrate orthologue of Phox2a and Phox2b; that affects ALA and SIA axonal development; ceh-17 affects ALA and SIA antero-posterior axonal growth and navigation, and is expressed in five neurons of the ring ganglia (ALA and the 4 SIAs) with strongest expression in embryos a…
ceh-24	F55B12.1	V	+	ceh-24 encodes an NK class homeodomain protein orthologous to human NK2 Homeobox 1 (NKX2-1; OMIM:600635) which is expressed in the thyroid, lung, and bronchial epithelia and which, when mutated, leads to disease.
ceh-28	K03A11.3	X	+	ceh-28 encodes a homeodomain protein of the NK-2 family; ceh-28 is expressed in a single pharyngeal neuron, M4; within M4, CEH-28 functions to positively regulate the expression of dbl-1, which encodes a TGF-beta, and hence, TGF-beta signaling to ensure proper morphology of the pharyngeal g1 gland cells that are located adjacent to M4.
ceh-31	C33D12.1	X	-	ceh-31 encodes a protein containing a homeobox domain.
ceh-33	C10G8.7	V	-	ceh-33 encodes a Six/sine oculis class homeodomain transcription factor; preliminary RNAi experiments suggest that CEH-33 activity may be required for gonad development; a ceh-33::gfp reporter shows very weak pharyngeal expression in late embryos and early larvae.
ceh-62	R06F6.6	II	+	none available
ceh-7	C34C6.8	II	-	ceh-7 encodes a homeodomain transcription factor; expressed in cells around the rectum of the male tail.
ceh-76	Y97E10AM.1	V	-	none available
ceh-81	F45C12.3	II	+	none available
ceh-84	C40D2.4	II	-	none available
ceh-85	F59H6.6	II	-	none available
ceh-90	R03E1.4	X	-	none available
ces-1	F43G9.11	I	+	ces-1 encodes a C2H2-type zinc finger transcription factor that is a member of the Snail family of proteins that includes Drosophila Scratch, Snail, and Slug, and human SNAIL and SLUG; during development, CES-1 functions as a transcriptional repressor that blocks programmed cell death in specific neurons by inhibiting expression of the cell-death activator EGL-1; in addition, CES-1 functions to r…
che-11	C27A7.4	V	-	che-11 encodes a large, unfamiliar protein with orthologs in vertebrates and arthropods (e.g., KIAA0590 and CG11838-PA) and in Chlamydomonas (IFT140), as well as distant similarity to OSM-1 and ZK520.1; che-11 is required for normal synthesis of sensory cilia (via intraflagellar transport) in sensory neurons, osmotic avoidance, and dauer formation.
che-3	F18C12.1	I	-	che-3 encodes a dynein heavy chain (DHC) 1b isoform that affects the establishment and maintainance of the structural integrity of sensory cilia, and that also has a role in intraflagellar transport; CHE-3 is expressed in ciliated sensory neurons.
che-6	C23H5.7	IV	-	none available
chil-1	C08H9.4	II	-	none available
chil-11	C45E5.2	IV	+	none available
chil-14	R09B5.12	V	+	none available
chil-15	R09D1.1	II	-	none available
chil-16	R09D1.2	II	-	none available
chil-19	R09D1.6	II	-	none available
chil-20	R09D1.7	II	-	none available
chil-21	R09D1.8	II	-	none available
chil-23	R09D1.11	II	-	none available
chil-25	T19H5.1	II	-	none available
chil-26	T19H5.2	II	+	none available
chil-5	C08H9.11	II	-	none available
chil-7	C08H9.13	II	-	none available
ckb-3	B0285.10	III	+	ckb-3 encodes a putative choline kinase; CKB-1 through CKB-4 comprise a related group ( B ) of choline kinases.
ckr-1	T23B3.4	I	-	T23B3.4 encodes a seven transmembrane receptor that is most closely related to the mammalian cholecystokinin receptors; loss of T23B3.4 activity via RNAi, either singly or in combination with another cholecystokinin receptor-encoding gene, Y39A3B.5, has no effect on fat metabolism, however large-scale RNAi screens have reported that T23B3.4(RNAi) results in embryonic lethality and reduced brood s…
clc-4	T05A10.2	X	-	clc-4 encodes a claudin homolog that may be required for normal cohesion of apical junctions in epithelia; CLC-4 is worm-specific, with obvious homologs only in C. elegans; claudins are integral membrane proteins with four transmembrane sequences that are found in mammalian tight junctions (TJs), induce TJs when transgenically expressed in cells normally lacking them, and can mediate the specific…
clec-100	Y53H1A.3	I	-	none available
clec-101	F15D3.2	I	-	none available
clec-103	T26E3.1	I	+	none available
clec-105	Y18D10A.24	I	-	none available
clec-106	Y18D10A.12	I	-	none available
clec-108	Y26D4A.6	I	-	none available
clec-109	F17B5.3	I	-	clec-109 encodes a C-type lectin (CTL); by homology, CLEC-109 is predicted to function as a calcium-dependent, carbohydrate binding protein.
clec-110	F17B5.5	I	+	none available
clec-111	Y71A12B.5	I	+	none available
clec-112	Y71A12B.6	I	+	none available
clec-113	F47G4.1	I	-	none available
clec-114	C49A1.9	I	-	none available
clec-115	C49A1.6	I	+	none available
clec-117	B0432.12	II	-	none available
clec-118	W04H10.4	II	-	none available
clec-121	Y25C1A.4	II	+	none available
clec-122	Y25C1A.3	II	+	none available
clec-124	C17F4.1	II	+	none available
clec-127	W10G11.5	II	-	none available
clec-128	W10G11.6	II	-	none available
clec-129	W10G11.15	II	+	none available
clec-13	H16D19.1	I	+	none available
clec-130	W10G11.14	II	+	none available
clec-131	W10G11.7	II	-	none available
clec-132	W10G11.13	II	+	none available
clec-133	W10G11.12	II	+	none available
clec-134	W10G11.11	II	+	none available
clec-135	C16A11.8	II	-	none available
clec-136	F35D11.7	II	-	none available
clec-137	F35D11.8	II	-	none available
clec-138	F35D11.9	II	-	none available
clec-139	F35D11.10	II	-	none available
clec-140	T05A7.2	II	+	none available
clec-141	EEED8.11	II	-	none available
clec-142	K01C8.8	II	+	none available
clec-144	T27D12.3	II	-	none available
clec-148	F40G9.10	III	-	none available
clec-15	T07D10.4	I	-	none available
clec-151	F10F2.7	III	+	none available
clec-156	F26A1.11	III	-	none available
clec-158	R13F6.8	III	-	none available
clec-162	C07A9.1	III	-	none available
clec-163	Y39A1B.1	III	+	none available
clec-164	Y55F3C.5	IV	+	none available
clec-167	F38A1.4	IV	-	none available
clec-168	F38A1.7	IV	+	none available
clec-169	F38A1.14	IV	+	none available
clec-17	E03H4.10	I	-	none available
clec-172	K03H6.7	IV	-	none available
clec-175	R08C7.6	IV	+	none available
clec-176	E03H12.3	IV	+	none available
clec-177	E03H12.2	IV	+	none available
clec-179	C42D4.11	IV	-	none available
clec-18	F56H6.8	I	-	none available
clec-183	T20D3.1	IV	+	none available
clec-184	F08G5.7	IV	+	none available
clec-185	C25G4.1	IV	+	none available
clec-189	M199.6	IV	+	none available
clec-19	F36H5.6	II	+	none available
clec-191	F38C2.6	IV	-	none available
clec-194	Y116A8A.8	IV	+	none available
clec-195	Y116A8C.21	IV	-	none available
clec-197	C49C3.12	IV	-	none available
clec-198	C49C3.13	IV	+	none available
clec-199	C30H6.1	IV	+	none available
clec-2	B0454.7	II	-	none available
clec-20	T07H3.5	II	-	none available
clec-202	C30H6.4	IV	+	none available
clec-203	Y50D4B.5	V	+	none available
clec-204	Y46H3B.2	V	+	none available
clec-206	F59A7.1	V	-	none available
clec-207	F36F12.5	V	+	none available
clec-208	F36F12.6	V	+	none available
clec-21	T07H3.4	II	-	none available
clec-210	Y73C8C.2	V	+	none available
clec-211	F19F10.6	V	-	none available
clec-213	C50E3.3	V	+	none available
clec-214	C50E3.1	V	+	none available
clec-216	F26D11.5	V	-	none available
clec-219	W02D7.10	V	+	none available
clec-226	R10D12.5	V	+	none available
clec-227	F08H9.5	V	+	none available
clec-229	H02K04.1	V	-	none available
clec-230	C29F3.5	V	-	none available
clec-231	C29F3.4	V	-	none available
clec-232	F36G9.11	V	+	none available
clec-234	F26D2.12	V	-	none available
clec-238	Y102A5C.17	V	+	none available
clec-239	Y102A5C.16	V	+	none available
clec-24	F49A5.4	V	+	none available
clec-240	F49H6.1	V	+	none available
clec-241	F49H6.2	V	-	none available
clec-242	Y68A4B.2	V	-	none available
clec-243	Y68A4B.1	V	-	none available
clec-244	T27C5.7	V	+	none available
clec-245	C31G12.2	V	-	none available
clec-246	F16H6.2	V	+	none available
clec-247	Y51A2A.1	V	+	none available
clec-248	Y51A2A.11	V	+	none available
clec-249	Y51A2A.7	V	-	none available
clec-25	T20B3.15	V	+	none available
clec-250	F11D11.14	V	-	none available
clec-251	F11D11.8	V	-	none available
clec-252	F11D11.7	V	-	none available
clec-253	F11D11.11	V	-	none available
clec-255	F11D11.1	V	-	none available
clec-256	Y17D7B.6	V	+	none available
clec-257	Y17D7B.8	V	+	none available
clec-259	M162.1	V	+	none available
clec-26	T20B3.12	V	+	none available
clec-260	Y60A3A.2	V	-	none available
clec-261	ZC15.6	V	-	none available
clec-262	ZC15.2	V	+	none available
clec-263	F26F2.6	V	+	none available
clec-27	Y102A5B.1	V	+	none available
clec-28	F49A5.5	V	+	none available
clec-29	T25E12.9	V	-	none available
clec-32	F49A5.9	V	-	none available
clec-33	F49A5.7	V	-	none available
clec-34	T25E12.8	V	+	none available
clec-35	Y102A5B.2	V	-	none available
clec-36	T20B3.16	V	-	none available
clec-37	Y102A5B.3	V	-	none available
clec-38	T25E12.10	V	-	none available
clec-39	T25E12.7	V	+	none available
clec-40	T20B3.13	V	-	none available
clec-42	F16H6.1	V	+	none available
clec-43	R07C3.1	II	+	none available
clec-44	R07C3.12	II	-	none available
clec-45	F07C4.2	V	+	none available
clec-46	F07C4.9	V	-	none available
clec-57	F08H9.6	V	+	none available
clec-58	ZK666.3	II	-	none available
clec-59	ZK666.5	II	-	none available
clec-6	C35D10.15	III	-	none available
clec-61	ZK666.7	II	-	none available
clec-64	F35C5.7	II	+	none available
clec-71	Y46C8AL.4	IV	+	none available
clec-72	Y46C8AL.5	IV	+	none available
clec-76	Y46C8AR.1	IV	+	none available
clec-79	F47C12.4	IV	+	none available
clec-92	Y52B11A.5	I	+	none available
clec-93	ZK39.4	I	+	none available
clec-94	ZK39.3	I	+	none available
clec-95	ZK39.2	I	+	none available
clec-96	ZK39.5	I	+	none available
clec-98	ZK39.7	I	-	none available
clec-99	ZK39.8	I	-	none available
clk-1	ZC395.2	III	+	clk-1 encodes the C. elegans ortholog of COQ7/CAT5, a highly conserved demethoxyubiquinone (DMQ) hydroxylase that is necessary for the biosynthesis of ubiquinone (coenzyme Q, Q9) from 5-demethoxyubiquinone (DMQ9); in C. elegans, CLK-1 activity is required for normal physiological rates of growth, development, behavior, and aging, as well as for normal brood sizes.
cnc-5	R09B5.10	V	+	cnc-5 encodes one of eleven C. elegans caenacin peptides; CNC-5 is predicted to be a secreted protein that, based upon similarity to CNC-2, -4, and -6, may function as an antimicrobial peptide in the innate immune response.
cnc-9	R13D7.11	V	-	cnc-9 encodes one of eleven C. elegans caenacin peptides.
cng-2	Y76B12C.1	IV	+	none available
cng-3	F38E11.12	IV	-	cng-3 is predicted to encode a cyclic nucleotide gated (CNG) channel that is required for wild-type thermotolerance; cng-3 is expressed in five sensory neurons, including the thermosensory neuron AFD.
col-102	C18H7.3	IV	+	col-102 encodes a cuticle collagen.
col-110	F19C7.7	IV	-	none available
col-114	D2024.8	IV	-	none available
col-115	Y42H9B.1	IV	+	none available
col-123	W08D2.6	IV	+	col-123 is homologous to the human gene A TYPE IV COLLAGEN (COL6A1; OMIM:303631), which when mutated is sometimes associated with diffuse leiomyomatosis.
col-126	F54D1.2	IV	+	none available
col-128	F12F6.9	IV	-	none available
col-132	C39E9.9	IV	-	none available
col-137	Y51H4A.9	IV	-	none available
col-141	T15B7.5	V	+	none available
col-148	C12D8.8	V	+	none available
col-151	AC3.6	V	-	none available
col-152	F32G8.5	V	+	none available
col-163	F46B3.17	V	+	none available
col-164	T21D9.1	X	+	none available
col-170	T10E10.6	X	+	none available
col-171	T10E10.7	X	+	none available
col-174	F46C8.2	X	+	none available
col-176	ZC373.7	X	+	none available
col-185	H06A10.2	X	-	none available
col-187	C30F2.1	X	+	none available
col-2	W01B6.7	IV	-	col-2 encodes a member of the collagen superfamily containing collagen triple helix repeats (20 copies); expression peaks during the molt that separates the L2 larval and dauer stages as the dauer cuticle is being formed, and mRNA is expressed at low levels in post-dauer L4 larvae and in adult animals.
col-35	C15A11.1	I	-	col-35 encodes a collagen that is individually dispensable for viability and gross morphology in mass RNAi screens; the amino- and carboxyl-terminal cysteine-rich regions of COL-35 are most closely related to those of COL-8, COL-19, and COL-39.
col-36	C27H5.5	II	-	col-36 encodes a collagen protein; expressed during the L1 to L2 and L2 to dauer larval stage molts.
col-37	ZK863.2	V	-	col-37 encodes a cuticle collagen.
col-39	C09G5.4	II	+	col-39 encodes a collagen that is individually dispensable for viability and gross morphology in mass RNAi screens; the amino- and carboxyl-terminal cysteine-rich regions of COL-39 are most closely related to those of COL-8, COL-19, and COL-35.
col-44	F54B11.2	X	+	col-44 encodes a cuticle collagen.
col-46	Y18H1A.13	I	-	col-46 encodes a cuticle collagen.
col-47	Y18H1A.12	I	+	col-47 encodes a cuticle collagen.
col-51	T28F2.8	I	+	col-51 encodes a cuticle collagen.
col-52	D1007.2	I	-	col-52 encodes a collagen; loss of col-52 via large-scale RNAi screens results in embryonic lethality and body morphology defects.
col-55	T05E7.2	I	+	none available
col-56	T08B2.2	I	+	none available
col-58	F26B1.4	I	+	none available
col-60	F22D6.10	I	+	none available
col-61	C01H6.1	I	-	none available
col-64	F52F12.2	I	-	none available
col-72	W09G10.1	II	-	none available
col-75	K03H9.2	II	+	none available
col-84	K12D12.3	II	+	col-84 encodes a nematode cuticular collagen; RNAi experiments that target col-84 (as well as neighboring genes) result in defects in embryonic and larval development, body morphology, and reproduction.
col-86	Y81G3A.5	II	-	none available
col-87	Y39G8C.4	II	-	none available
col-9	F54B11.1	X	+	col-9 encodes a collagen protein.
col-90	C29E4.1	III	+	none available
col-91	F09G8.6	III	-	col-91 encodes a cuticle collagen; loss of col-91 via large-scale RNAi results in no obvious defects.
comp-1	F37E3.3	I	-	none available
comt-2	Y32B12A.3	V	-	none available
coq-6	K07B1.2	V	+	coq-6 encodes a putative flavin-dependent aromatic-ring monooxygenase, homologous to yeast COQ6; COQ-6 is required for ubiquinone (coenzyme Q9) biosynthesis and for normally short lifespan; coq-6(RNAi) animals have reduced levels of coenzyme Q9 and superoxide, and have abnormally long lifespans.
cpna-3	C01F6.1	IV	+	cpna-3 encodes a putative calcium-dependent phospholipid binding protein of the copine family; cpna-3 is required for sperm to normally migrate towards a PUFA-based signal exuded by oocytes; cpna-3(RNAi) hermaphrodites are infertile, both through aberrant loss of their own sperm and through failure of males to effectively inseminate them.
crn-7	F09G8.2	III	+	none available
ctb-1	MTCE.21	MtDN	+	The ctb-1 gene resides on the mitochondrial chromosome, and encodes the cytochrome b protein of mitochondrial complex III; mutation of ctb-1 suppresses the slow embryonic development of isp-1 mutants, while enhancing their paraquat resistance.
ctc-1	MTCE.26	MtDN	+	The ctc-1 gene resides on the mitochondrial chromosome, and encodes the protein cytochrome c oxidase subunit 1; CTC-1 functions as the catalytic subunit of the cytochrome c oxidase complex (also known as Complex IV) that is the terminal member of the electron transport chain that catalyzes the reduction of oxygen to water.
ctc-2	MTCE.31	MtDN	+	The ctc-2 gene resides on the mitochondrial chromosome, and encodes the protein cytochrome c oxidase subunit 2; cytochrome c oxidase is the component of the respiratory chain that catalyzes the reduction of oxygen to water; CTC-2 is one of the 3 subunits (1-3) that forms the functional core of the enzyme complex.
ctc-3	MTCE.23	MtDN	+	The ctc-3 gene resides on the mitochondrial chromosome, and encodes the protein cytochrome c oxidase subunit 3; cytochrome c oxidase is the component of the respiratory chain that catalyzes the reduction of oxygen to water; CTC-3 is one of the 3 subunits (1-3) that forms the functional core of the enzyme complex.
cut-1	C47G2.1	II	+	cut-1 encodes a component of cuticlin, an insoluble residue of the nematode cuticle required for alae formation and radial shrinking during dauer differentiation; expressed specifically in the cuticle of dauer larvae and is secreted by the seam cells.
cutl-1	F53F1.1	V	-	none available
cutl-12	T22C8.7	II	-	none available
cutl-13	W04C9.3	I	+	none available
cutl-17	F38E11.4	IV	-	none available
cutl-4	W06D12.1	V	-	none available
cutl-5	F10E7.10	II	-	none available
cutl-7	F53B6.6	I	-	none available
cutl-9	M28.1	II	+	none available
cwp-1	C37H5.10	V	-	cwp-1 encodes a nematode-specific protein that is coexpressed with lov-1 and pkd-2.
cwp-4	K11D12.1	V	+	cwp-4 encodes a protein with some similarity to mucins that is predicted to be secreted, and is alleged to be coexpressed with polycystins; CWP-4 is dispensable for viability and gross morphology in mass RNAi screens.
cwp-5	F48C11.2	X	-	cwp-5 encodes a novel, single-pass Type I transmembrane protein; CWP-5 is required for the response step of male mating behavior, acting in the same pathway as the polycystin complex members, LOV-1 and PKD-2; specifically, CWP-5 appears to function to negatively regulate latent, obstructive signaling by LOV-1 or PKD-2; CWP-5 is expressed in 21 male-specific sensory neurons, where it localizes to …
cyp-13A11	F14F7.2	III	+	cyp-13A11 encodes one of ~80 C. elegans cytochrome P450s: membrane-associated, heme-containing NADPH-dependent monooxygenases that catalyze the oxidative metabolism of a variety of exogenous compounds and endogenous substrates; cyp-13A11 expression is upregulated in response to the tetrachlorobiphenyl PCB52.
cyp-13A12	F14F7.3	III	+	cyp-13A12 encodes one of ~80 C. elegans cytochrome P450s: membrane-associated, heme-containing NADPH-dependent monooxygenases that catalyze the oxidative metabolism of a variety of exogenous compounds and endogenous substrates.
cyp-13A3	T10B9.5	II	-	cyp-13A3 encodes one of ~80 C. elegans cytochrome P450s: membrane-associated, heme-containing NADPH-dependent monooxygenases that catalyze the oxidative metabolism of a variety of exogenous compounds and endogenous substrates.
cyp-13A6	T10B9.3	II	-	cyp-13A6 encodes one of ~80 C. elegans cytochrome P450s: membrane-associated, heme-containing NADPH-dependent monooxygenases that catalyze the oxidative metabolism of a variety of exogenous compounds and endogenous substrates; loss of cyp-13A6 activity in large-scale RNAi screens results in decreased and/or slow growth and cadmium hypersensitivity; cyp-13A6 expression is upregulated in response t…
cyp-13A7	T10B9.10	II	+	cyp-13A7 encodes a homolog of cytochrome P450 proteins; these proteins are membrane proteins with a heme prosthetic group that catalyze the synthesis of steroid hormones (and bile salts), and also detoxify foreign substances (xenobiotic compounds); loss of cyp-13A7 activity in large-scale RNAi screens results in uncoordinated locomotion and decreased and/or slow growth; a cyp-13A7::gfp promoter f…
cyp-13B2	K06G5.2	X	+	cyp-13B2 encodes one of ~80 C. elegans cytochrome P450s: membrane-associated, heme-containing NADPH-dependent monooxygenases that catalyze the oxidative metabolism of a variety of exogenous compounds and endogenous substrates.
cyp-14A4	R04D3.1	X	-	cyp-14A4 encodes one of ~80 C. elegans cytochrome P450s: membrane-associated, heme-containing NADPH-dependent monooxygenases that catalyze the oxidative metabolism of a variety of exogenous compounds and endogenous substrates.
cyp-25A6	K06B9.1	IV	+	none available
cyp-33B1	C25E10.2	V	+	none available
cyp-33C11	Y49C4A.9	V	-	none available
cyp-33C12	Y5H2B.6	V	-	none available
cyp-33C6	F41B5.7	V	-	none available
cyp-33D1	K05D4.4	V	-	none available
cyp-33D3	Y17D7A.4	V	-	none available
cyp-34A1	T10H4.10	V	-	none available
cyp-34A10	B0213.16	V	-	none available
cyp-35D1	F14H3.10	V	+	none available
cysl-4	F59A7.9	V	+	none available
D1005.10	D1005.10	X	-	none available
D1005.5a	D1005.5	X	-	none available
D1005.6	D1005.6	X	-	none available
D1007.9	D1007.9	I	+	none available
D1014.2	D1014.2	V	+	none available
D1014.6	D1014.6	V	+	none available
D1014.7b	D1014.7	V	+	none available
D1022.2	D1022.2	II	+	none available
D1022.3	D1022.3	II	-	none available
D1022.5	D1022.5	II	-	none available
D1022.9a	D1022.9	II	-	none available
D1025.11	D1025.11	X	-	none available
D1044.4	D1044.4	III	-	none available
D1044.5	D1044.5	III	-	none available
D1044.7	D1044.7	III	-	none available
D1046.16	D1046.16	IV	+	none available
D1065.3	D1065.3	V	-	none available
D1069.1	D1069.1	II	+	none available
D1079.1	D1079.1	X	+	none available
D1081.10	D1081.10	I	-	none available
D1081.11	D1081.11	I	-	none available
D1081.12	D1081.12	I	-	none available
D1081.3	D1081.3	I	-	none available
D1081.5	D1081.5	I	+	none available
D2005.4.2	D2005.4	I	+	none available
D2007.3	D2007.3	III	+	none available
D2024.10	D2024.10	IV	-	none available
D2024.18	D2024.18	IV	+	none available
D2024.4b	D2024.4	IV	+	none available
D2045.5	D2045.5	III	-	none available
D2062.1	D2062.1	II	+	none available
D2062.5	D2062.5	II	+	none available
D2062.7	D2062.7	II	+	none available
D2092.10	D2092.10	I	-	none available
daao-1	Y69A2AR.5	IV	+	daao-1 encodes a D-amino acid oxidase (DAAO); recombinant DAOO-1 has DAAO activity on neutral and basic D-amino acid substrates (e.g., D-alanine or D-methionine, and D-arginine), with highest catalytic efficiency on D-arginine; since the C-terminal residues of DAAO-1 match the PTS1 consensus sequence, DAAO-1 is predicted to be peroxisomal.
daf-11	B0240.3	V	-	daf-11 encodes a transmembrane guanylate cyclase; daf-11 activity is required for a number of processes dependent upon normal chemosensory function, including dauer formation and recovery and chemotaxis to both volatile and non-volatile odorants; daf-11 is also required for axon formation; daf-11 acts together with daf-21 to regulate chemosensory function and genetically upstream of daf-12 with r…
daf-22	Y57A10C.6	II	-	daf-22 encodes the C. elegans ortholog of human sterol carrier protein SCP2, which catalyzes the final step in peroxisomal fatty acid beta-oxidation; in C. elegans, DAF-22 activity is required for dauer pheromone biosynthesis; daf-22 mutant animals cannot produce dauer pheromone, but can synthesize weakly active longer-chain fatty acid derivatives; in synthesizing dauer pheromone, DAF-22 acts dow…
daf-37	C30B5.5	II	-	daf-37 encodes a G-protein coupled receptor (GPCR) that belongs to the serpentine receptor class w (Srw) family of chemoreceptors; daf-37 functions in dauer signaling, upstream of the daf-11/guanylyl cyclase, daf-7/TGF-beta, and daf-2/insulin signaling pathways; daf-37 specifically senses and binds to a ascaroside (ascr#2), ascarosides are the major small-molecule components of the dauer pheromon…
dao-4	ZC373.6	X	+	dao-4 encodes a novel protein, conserved amongst nematodes; dao-4 transcripts are expressed at higher levels in wild-type adult animals than in daf-2 mutant adults at 25C, suggesting that dao-4 expression is positively regulated by DAF-2/insulin-like receptor signaling; reduced dao-4 expression in daf-2 mutants is dependent upon DAF-16.
dct-10	Y38H6C.5	V	+	none available
dct-12	Y57A10C.7	II	-	none available
dct-14	Y38H6C.3	V	-	none available
dct-19	C32H11.13	IV	+	none available
dct-5	F07F6.5	II	-	none available
dct-9	W03F11.3	I	-	none available
decr-1.1	F43C11.3	II	+	none available
decr-1.3	T05C12.3	II	-	none available
del-7	C46A5.2	IV	+	none available
del-8	C11E4.3	X	+	none available
delm-1	F23B2.3	IV	-	none available
dgn-2	F56C3.6	X	-	none available
dgn-3	F07G6.1	X	+	none available
dhc-4	W05B2.4	III	+	none available
dhhc-12	F59C6.2	I	+	none available
dhhc-13	H32C10.3	IV	+	none available
dhhc-5	R13F6.5	III	-	none available
dhod-1	W02D3.2	I	+	none available
djr-1.2	C49G7.11	V	-	djr-1.2 encodes a glyoxylase orthologous to human DJ-1; DJR-1.2 is expressed throughout the life cycle in a variety of tissues including pharyngeal muscles, the pharyngeal-intestinal valve, the ventral nerve cord, spermatheca, rectal gland cell, inner labial (IL) cells of head neurons, the phasmid (PHA/PHB) neurons, and supporting sheath/socket cells, and in adults is also found in the head mesod…
dlc-4	Y10G11A.3	IV	+	dlc-4 encodes a putative dynein light chain 1; DLC-4 is orthologous to human DYNLL1 (OMIM:601562) and DYNLL2 (OMIM:608942), but much more divergent from them than its paralog DLC-1; its other paralogs are DLC-3 (97% identical to DLC-4), DLC-2, and DLC-5/-6.
dlc-6	Y106G6G.3	I	+	dlc-6 encodes a putative dynein light chain 1; DLC-6 is orthologous to human DYNLL1 (OMIM:601562) and DYNLL2 (OMIM:608942), but much more divergent from them than its paralog DLC-1; DLC-6 s other paralogs are DLC-2/-5; DLC-6 has no obvious function in mass RNAi assays.
dmd-11	C34D1.2	V	-	none available
dmd-4	C27C12.6	X	-	none available
dmsr-10	ZC404.10	V	-	none available
dmsr-12	H34P18.1	V	-	none available
dmsr-13	T15B7.12	V	-	none available
dmsr-14	T15B7.11	V	-	none available
dmsr-15	T15B7.13	V	-	none available
dmsr-16	T27B2.1	V	-	none available
dmsr-8	C35A5.7	V	-	none available
dod-20	B0554.6	V	+	none available
dod-21	C32H11.10	IV	+	none available
dos-2	K10G6.2	II	+	none available
dot-1.3	W06D11.4	X	-	none available
dpr-1	R10D12.2	V	-	dpr-1 encodes a nuclear hormone receptor; dpr-1 may play a role in endoderm development.
dpy-17	F54D8.1	III	+	dpy-17 encodes a cuticle collagen; during development, dpy-17 activity is required for normal body morphology, hermaphrodite tail development, and outgrowth of posterior canal cell processes; genetic and immunofluorescence studies suggest that extracellular assembly of DPY-17 and the essential SQT-3 cuticle collagen is interdependent, as loss of dpy-17 activity results in intracellular retention …
dpy-2	T14B4.6	II	+	The dpy-2 gene encodes an unusual cuticular collagen that is required for maintaining the normal body length of the animal in later larval stages; dpy-2 interacts with other cuticular collagens such as dpy-10 and sqt-1, and suppresses mutations in glp-1, mup-1, and emb-5.
dpy-8	C31H2.2	X	-	dpy-8 encodes a collagen with a nematode-specific N-terminal domain that is required for normal body morphology and (perhaps) for a normal embryonic cell division rate; dpy-8 interacts genetically with emb-5 and glp-1.
dsc-1	C18B12.3	X	-	none available
dsl-4	F16B12.2	X	+	dsl-4 encodes a putative secreted protein with a single DSL domain and three EGF domains in series, somewhat like Delta/LAG-2; unlike the nematode-specific family of Delta/LAG-2-like proteins (including DSL-1, -2, -3, -5, -6, and -7), DSL-4 is evolutionarily divergent, with perhaps a distant affinity to APX-1, ARG-1, and LAG-2.
dsl-5	F58B3.8	IV	-	dsl-5 encodes a putative secreted protein with single DSL and EGF domains in series, somewhat like Delta/LAG-2; DSL-5 belongs to a nematode-specific family of Delta/LAG-2-like proteins that includes DSL-1, -2, -3, -5, -6, and -7.
dsl-7	F15B9.9	V	+	none available
duox-2	F53G12.3	I	+	duox-2 encodes a large partial homolog of dual oxidase, with an N-terminal peroxidase domain, two central calmodulin-binding EF hands, and a C-terminal superoxide-generating NADPH-oxidase domain; duox-2 may be required for dityrosine cross-linking of collagen, and thus for cuticular integrity; duox-2 may use cytosolic NADPH to generate reactive oxygen, which then may drive the peroxidase ectodoma…
dyf-19	Y43F8C.4	V	+	dyf-19 encodes the C. elegans ortholog of mammalian transition fibre protein FBF1 (Fas (TNFRSF6)-binding factor 1); DYF-19 is required for actively regulating transit of assembled intraflagellar transport (IFT) particles through the ciliary base, and thus for proper ciliogenesis; DYF-19 physically interacts with DYF-11, a component of the IFT-B subcomplex orthologous to mammalian IFT54; DYF-19 lo…
dyf-5	M04C9.5	I	+	dyf-5 encodes a putative MAP kinase orthologous to human MAK/ICK (OMIM:154235), Chlamydomonas reinhardtii LF4, and Leishmania mexicana MPK9; DYF-5 negatively regulates cilial length, restricts KAP-1 to middle ciliary segments, is required for normal localization of six IFT components, and is required for OSM-3 to comigrate normally with IFT particles; DYF-5 is also required for dye-filling of amp…
dylt-2	D1009.5	X	-	dylt-2 encodes a small putative dynein light chain subunit orthologous to human CTEX1D1, LOC343521, and TCTE3; unlike its distant paralog DYLT-1, DYLT-2 does not obviously inhibit DHC-1 in vivo.
dylt-3	T05C12.5	II	+	dylt-3 encodes a putative dynein light chain subunit paralogous to DYLT-3, and orthologous to human DYNLT1 and DYNLT3 (OMIM: 300302); unlike its paralog DYLT-1, DYLT-3 does not obviously inhibit DHC-1 in vivo.
E01A2.8	E01A2.8	I	-	The E01A2.8 gene encodes one of five paraoxonase-like proteins; it is homologous to the human PARAOXONASE 1 gene (PON1, OMIM:168820), which in some allelic forms is associated with susceptibility to coronary artery disease.
E02A10.5	E02A10.5	V	+	none available
E02C12.10	E02C12.10	V	-	none available
E02C12.12.	E02C12.12	V	-	none available
E02C12.6	E02C12.6	V	-	none available
E02C12.9	E02C12.9	V	-	none available
E02H4.5	E02H4.5	X	-	none available
E02H4.8	E02H4.8	X	-	none available
E03H12.4	E03H12.4	IV	+	none available
E03H12.9	E03H12.9	IV	-	none available
E03H4.11	E03H4.11	I	+	none available
E03H4.2	E03H4.2	I	-	none available
E03H4.4	E03H4.4	I	+	none available
E04F6.12	E04F6.12	II	+	none available
E04F6.4	E04F6.4	II	+	none available
eat-18	Y105E8A.7	I	+	eat-18 encodes a small novel protein with an intracellular N terminus, a single predicted transmembrane domain, and a short, extracellular carboxy terminus; eat-18 is required for proper nicotinic neurotransmission by the excitatory pharyngeal MC neuron and thus, for rapid pharyngeal pumping in the presence of food; eat-18 is also required for alpha-bungarotoxin-binding to pharyngeal nicotinic re…
EEED8.18	EEED8.18	II	-	none available
EEED8.3	EEED8.3	II	+	EEED8.3 encodes a protein with similarity to fatty acid-binding proteins; loss of EEED8.3 activity via RNAi results in 20-30% embryonic lethality.
efhd-1	Y48B6A.6	II	+	efhd-1 encodes the C. elegans ortholog of the mammalian EF hand domain-containing proteins EFHD1 and EFHD2; large-scale expression studies report that efhd-1 is expressed in the pharynx, the body wall muscle, and the nervous system.
EGAP1.1	EGAP1.1	III	-	none available
EGAP5.1	EGAP5.1	X	+	none available
EGAP798.1	EGAP798.1	V	+	none available
egas-1	Y69H2.11	V	+	none available
egas-2	Y69H2.12	V	+	none available
egg-1	B0244.8	III	+	egg-1 encodes a LDL-receptor repeat-containing protein that is required for fertilization; egg-1 acts redundantly with a similar protein, egg-2, and both proteins are expressed in the developing oocyte; egg-1 is not required for male fertility; egg-1 localizes to the oocyte plasma membrane; the structure and localization of the egg-1 protein suggest that it is required together with egg-2, for ga…
egl-13	T22B7.1	X	+	egl-13 encodes a SOX domain transcription factor; egl-13 is required for maintenance of the uterine pi cell fate; mutations in egl-13 affect the cell fusion process that makes the vulval-uterine connection and consequently egg laying; egl-13 is expressed in the pi cells, transiently expressed in the rho lineage, in the anchor cell following fusion, and in neurons, body wall muscles, and intestina…
egl-8	B0348.4	V	+	egl-8 encodes a phospholipase C beta; egl-8 activity is required for pharyngeal pumping, defecation, activity levels, and innate immunity; egl-8 is genetically downstream of egl-30 with respect to aldicarb-induced paralysis, and is expressed in most or all neurons, with the strongest staining in the head and tail ganglia, and in the intestine.
ehn-3	ZK616.10	IV	-	ehn-3 encodes a nuclear Zn-finger protein with no obvious orthologs; EHN-3 controls development of somatic gonadal precursors (SGPs), and enables both HND-1 and TRA-1 functions in gonadogenesis; EHN-2 is expressed in SGP nuclei; ehn-3 expression is regulated by HND-1, while EHN-3 regulates tra-1 expression; enh-3(q689) homozygotes have mild defects in gonadogenesis, but double homozygotes also ca…
elo-7	F56H11.3	IV	+	The elo-7 gene encodes a paralog of elo-1 and elo-2, each of which encodes a polyunsaturated fatty acid (PUFA) elongase; ELO-7 has no known function in vivo.
elo-8	Y47D3A.30	III	-	The elo-8 gene encodes a paralog of elo-1 and elo-2, each of which encodes a polyunsaturated fatty acid (PUFA) elongase; elo-8 has no known function in vivo.
elt-2	C33D3.1	X	+	elt-2 encodes a GATA-type transcription factor most similar to the vertebrate GATA4-6 transcription factors required for cardiac and endoderm development (OMIM:601656, 600576); in C. elegans, ELT-2 is required redundantly with ELT-7 for initiating and maintaining terminal differentiation of the intestine and for regulating the intestinal innate immune respone; ELT-2 is expressed solely in the int…
ent-3	K02E11.1	V	-	none available
epg-4	F37C12.2	III	+	none available
epg-5	C56C10.12	II	-	none available
ercc-1	F10G8.7	I	+	ercc-1 encodes an ortholog of human ERCC1 (mutations in which are associated with Cerebrooculofacioskeletal Syndrome 4; OMIM:126380); ercc-1 is a core NER (Nuclear Excision Repair) factor (other members being xpa-1, xpf-1, and xpg-1); NER factors remove UV-induced DNA damage and have been demonstrated to be required for both the global genome repair (GGR) and transcription coupled repair (TCR) pa…
ets-5	C42D8.4	X	-	none available
exc-6	F58B6.2	III	+	none available
exp-1	H35N03.1	II	-	exp-1 encodes an excitatory, cation-selective GABA receptor; EXP-1 activity is essential for the enteric muscle contractions that are the third in a series of three independent muscle contractions controlling defecation, and when expressed in Xenopus oocytes, EXP-1 is capable of forming a cation-selective GABA receptor; a rescuing EXP-1::GFP reporter fusion is expressed in the intestinal and anal…
F01D4.9	F01D4.9	IV	+	none available
F01E11.18	F01E11.18	X	+	none available
F01E11.3	F01E11.3	X	+	none available
F01G10.5	F01G10.5	IV	-	none available
F01G10.6	F01G10.6	IV	-	none available
F01G12.1	F01G12.1	X	+	none available
F02A9.7	F02A9.7	III	-	none available
F02C9.1	F02C9.1	V	+	none available
F02C9.2	F02C9.2	V	+	none available
F02D10.2	F02D10.2	X	-	none available
F02D10.3	F02D10.3	X	-	none available
F02D8.1	F02D8.1	V	-	none available
F02D8.4	F02D8.4	V	+	none available
F02D8.9	F02D8.9	V	-	none available
F02E11.3	F02E11.3	II	-	none available
F02H6.6	F02H6.6	IV	-	none available
F02H6.7	F02H6.7	IV	-	none available
F07A11.1	F07A11.1	II	-	none available
F07B10.4a	F07B10.4	V	-	none available
F07B10.7a	F07B10.7	V	-	none available
F07B7.12	F07B7.12	V	-	none available
F07B7.13	F07B7.13	V	-	none available
F07B7.14	F07B7.14	V	-	none available
F07B7.7	F07B7.7	V	+	none available
F07C3.16	F07C3.16	V	-	none available
F07C3.3	F07C3.3	V	-	none available
F07C4.10	F07C4.10	V	-	none available
F07C4.11	F07C4.11	V	-	none available
F07C4.6	F07C4.6	V	+	none available
F07C6.2	F07C6.2	IV	+	none available
F07C6.6	F07C6.6	IV	+	none available
F07D3.3	F07D3.3	V	-	none available
F07E5.4	F07E5.4	II	-	none available
F07E5.7	F07E5.7	II	-	none available
F07E5.8	F07E5.8	II	-	none available
F07G11.1	F07G11.1	V	+	none available
F07G11.2	F07G11.2	V	+	none available
F07G11.4	F07G11.4	V	-	none available
F07G6.2	F07G6.2	X	+	none available
F07G6.3	F07G6.3	X	+	none available
F07G6.5	F07G6.5	X	-	none available
F07G6.8	F07G6.8	X	-	none available
F07G6.9	F07G6.9	X	+	none available
F07H5.8	F07H5.8	II	+	none available
F08A8.8	F08A8.8	I	-	none available
F08D12.4a	F08D12.4	II	+	none available
F08D12.7	F08D12.7	II	-	F08D12.7 encodes a novel protein conserved amongst Caenorhaditis species; although loss of F08D12.7 activity via RNAi results in no obvious defects, F08D12.7 transcripts are enriched in L1-stage muscle and upregulated in L2 larvae in response to overexpression of hlh-2 and hlh-8; in addition, in analyses of the early embryonic transcriptome, F08D12.7 transcripts are classified as strictly materna…
F08F8.6	F08F8.6	III	+	none available
F08G12.11	F08G12.11	X	-	none available
F08G12.3	F08G12.3	X	+	none available
F08G2.8	F08G2.8	II	+	none available
F09C11.1	F09C11.1	IV	-	none available
F09C6.10	F09C6.10	V	-	none available
F09C6.15	F09C6.15	V	+	none available
F09C6.16	F09C6.16	V	-	none available
F09E5.9	F09E5.9	II	+	none available
F09F3.5	F09F3.5	V	+	none available
F09F9.2	F09F9.2	X	-	none available
F09F9.5	F09F9.5	X	+	none available
F09G8.10a	F09G8.10	III	-	none available
F10A3.12	F10A3.12	V	+	none available
F10A3.16	F10A3.16	V	-	none available
F10B5.3	F10B5.3	II	-	none available
F10C1.1	F10C1.1	II	+	none available
F10C1.3	F10C1.3	II	-	none available
F10D11.3	F10D11.3	I	-	none available
F10D11.4	F10D11.4	I	-	none available
F10D11.5	F10D11.5	I	-	none available
F10D2.12	F10D2.12	V	-	none available
F10D7.1	F10D7.1	X	+	none available
F10E7.6	F10E7.6	II	+	none available
F10E9.1	F10E9.1	III	+	none available
F10G2.10a	F10G2.10	V	+	none available
F10G2.2	F10G2.2	V	+	none available
F10G2.7	F10G2.7	V	-	none available
F10G8.1a	F10G8.1	I	+	none available
F10G8.2	F10G8.2	I	-	none available
F11A1.2	F11A1.2	X	-	none available
F11A5.16	F11A5.16	V	+	none available
F11A5.3	F11A5.3	V	+	none available
F11A5.4	F11A5.4	V	+	none available
F11A5.5b	F11A5.5	V	+	none available
F11A5.6	F11A5.6	V	-	none available
F11C1.10	F11C1.10	X	+	none available
F11C1.9	F11C1.9	X	-	none available
F11C7.2	F11C7.2	X	+	none available
F11C7.6a	F11C7.6	X	+	none available
F11C7.7	F11C7.7	X	+	none available
F11D11.12	F11D11.12	V	-	none available
F11D11.21	F11D11.21	V	-	none available
F11D11.6	F11D11.6	V	-	none available
F11D5.5	F11D5.5	X	+	none available
F11D5.6	F11D5.6	X	-	none available
F11E6.10b	F11E6.10	IV	-	none available
F11F1.4	F11F1.4	III	-	none available
F11F1.5	F11F1.5	III	+	none available
F11G11.13	F11G11.13	II	-	none available
F12A10.6	F12A10.6	II	-	none available
F12A10.7	F12A10.7	II	-	none available
F12D9.2	F12D9.2	X	-	none available
F12E12.2	F12E12.2	II	+	none available
F13A2.3	F13A2.3	V	-	none available
F13A2.5	F13A2.5	V	-	none available
F13A7.1	F13A7.1	V	-	none available
F13A7.7	F13A7.7	V	-	none available
F13B12.7	F13B12.7	IV	+	none available
F13B6.1	F13B6.1	IV	+	none available
F13E9.10	F13E9.10	IV	-	none available
F13E9.16	F13E9.16	IV	-	none available
F13E9.4	F13E9.4	IV	-	none available
F13E9.8	F13E9.8	IV	-	none available
F13H8.6	F13H8.6	II	-	none available
F14D2.19	F14D2.19	II	-	none available
F14D2.7	F14D2.7	II	-	none available
F14D2.8	F14D2.8	II	-	This gene encodes a protein containing an F-box, a motif predicted to mediate protein-protein interactions either with homologs of yeast Skp-1p or with other proteins; this gene s encoded protein also contains an FTH/DUF38 motif, which may also mediate protein-protein interaction.
F14D7.1	F14D7.1	V	-	none available
F14D7.11	F14D7.11	V	-	none available
F14D7.14	F14D7.14	V	+	none available
F14D7.18	F14D7.18	V	-	none available
F14D7.5b	F14D7.5	V	-	none available
F14D7.8	F14D7.8	V	-	none available
F14D7.9	F14D7.9	V	+	none available
F14E5.1	F14E5.1	II	+	none available
F14E5.8	F14E5.8	II	+	none available
F14F7.5a	F14F7.5	III	+	none available
F14F7.7	F14F7.7	III	+	none available
F14F8.14	F14F8.14	V	-	none available
F14F8.8	F14F8.8	V	-	none available
F14F8.9	F14F8.9	V	-	none available
F14H12.2	F14H12.2	X	+	none available
F14H3.14	F14H3.14	V	-	none available
F14H3.9	F14H3.9	V	-	none available
F14H8.4	F14H8.4	V	+	none available
F14H8.5	F14H8.5	V	+	none available
F15A8.1	F15A8.1	X	+	none available
F15D3.9	F15D3.9	I	+	none available
F15E6.4	F15E6.4	IV	+	none available
F15E6.5	F15E6.5	IV	+	none available
F15G9.2	F15G9.2	X	-	none available
F15G9.6	F15G9.6	X	+	none available
F15H10.12	F15H10.12	V	-	none available
F15H10.5	F15H10.5	V	-	none available
F15H9.1	F15H9.1	I	+	none available
F16B12.5	F16B12.5	X	+	none available
F16B12.7	F16B12.7	X	+	none available
F16C3.4	F16C3.4	I	+	none available
F16D3.6	F16D3.6	I	+	none available
F16G10.1	F16G10.1	II	+	none available
F16G10.10	F16G10.10	II	-	none available
F16G10.11	F16G10.11	II	-	none available
F16G10.13	F16G10.13	II	-	none available
F16G10.14	F16G10.14	II	-	none available
F16G10.15	F16G10.15	II	-	none available
F16G10.2	F16G10.2	II	+	none available
F16G10.3	F16G10.3	II	+	none available
F16G10.6	F16G10.6	II	-	none available
F16G10.7	F16G10.7	II	-	none available
F16G10.8	F16G10.8	II	-	none available
F16G10.9	F16G10.9	II	-	none available
F16H6.3	F16H6.3	V	+	none available
F16H6.4a	F16H6.4	V	+	none available
F16H6.8	F16H6.8	V	-	none available
F16H6.9	F16H6.9	V	+	none available
F17A2.4	F17A2.4	X	+	none available
F17B5.10	F17B5.10	I	-	none available
F17B5.1a	F17B5.1	I	+	none available
F17B5.4	F17B5.4	I	+	none available
F17B5.6	F17B5.6	I	+	none available
F17B5.9	F17B5.9	I	-	none available
F17C11.1	F17C11.1	V	+	none available
F17C11.22	F17C11.22	V	-	none available
F17C11.4b	F17C11.4	V	+	none available
F17C11.6.2	F17C11.6	V	+	none available
F17E9.15	F17E9.15	IV	+	none available
F17E9.16	F17E9.16	IV	+	none available
F17E9.18	F17E9.18	IV	-	none available
F17H10.4	F17H10.4	X	-	none available
F18A1.1	F18A1.1	II	+	none available
F18A12.2	F18A12.2	II	+	none available
F18A12.7	F18A12.7	II	-	none available
F18C12.4	F18C12.4	I	-	none available
F18C5.9	F18C5.9	II	+	none available
F18E2.15	F18E2.15	V	-	none available
F18E3.10	F18E3.10	V	-	none available
F18E3.13	F18E3.13	V	+	none available
F18E9.3	F18E9.3	X	+	none available
F18E9.7a	F18E9.7	X	-	none available
F18G5.1	F18G5.1	X	+	none available
F18G5.5	F18G5.5	X	-	none available
F19B10.6	F19B10.6	II	-	none available
F19B6.10	F19B6.10	IV	+	none available
F19C7.6	F19C7.6	IV	+	none available
F19F10.8	F19F10.8	V	-	none available
F19G12.1	F19G12.1	X	+	none available
F19G12.10	F19G12.10	X	+	none available
F19G12.11	F19G12.11	X	-	none available
F19G12.2	F19G12.2	X	+	none available
F19G12.4	F19G12.4	X	+	none available
F19G12.9	F19G12.9	X	+	none available
F19H6.3	F19H6.3	X	-	none available
F19H6.5	F19H6.5	X	-	none available
F19H6.6	F19H6.6	X	+	none available
F20A1.2	F20A1.2	V	+	none available
F20A1.4	F20A1.4	V	-	none available
F20B6.1	F20B6.1	X	+	none available
F20B6.5	F20B6.5	X	-	none available
F20B6.6	F20B6.6	X	-	none available
F20B6.7	F20B6.7	X	-	none available
F20D12.7	F20D12.7	IV	-	none available
F20D6.1	F20D6.1	V	+	none available
F20D6.12	F20D6.12	V	-	none available
F20D6.9	F20D6.9	V	-	none available
F20E11.18a	F20E11.18	V	-	none available
F20E11.5	F20E11.5	V	-	none available
F20E11.7	F20E11.7	V	+	none available
F20G4.2	F20G4.2	I	-	none available
F20H11.4	F20H11.4	III	+	none available
F21A3.4	F21A3.4	V	+	none available
F21A9.1	F21A9.1	I	+	none available
F21C10.1	F21C10.1	V	+	none available
F21C10.5	F21C10.5	V	+	none available
F21C3.6	F21C3.6	I	-	none available
F21D12.2	F21D12.2	II	+	none available
F21D9.2	F21D9.2	V	-	none available
F21D9.3	F21D9.3	V	-	none available
F21D9.8	F21D9.8	V	-	none available
F21E9.2	F21E9.2	X	-	none available
F21E9.6	F21E9.6	X	-	none available
F21F12.1.2	F21F12.1	I	+	none available
F21F3.2	F21F3.2	I	+	none available
F21F3.7	F21F3.7	I	+	none available
F21F8.5	F21F8.5	V	-	none available
F21G4.3	F21G4.3	X	+	none available
F21H12.2	F21H12.2	II	+	none available
F21H12.3	F21H12.3	II	+	none available
F21H12.7	F21H12.7	II	+	none available
F21H7.10.2	F21H7.10	V	-	none available
F22B3.10a	F22B3.10	IV	-	none available
F22B3.5a	F22B3.5	IV	-	none available
F22B3.7	F22B3.7	IV	-	none available
F22B3.8	F22B3.8	IV	-	none available
F22B7.3	F22B7.3	III	+	none available
F22E5.11	F22E5.11	II	-	none available
F22E5.2	F22E5.2	II	+	none available
F22F4.1	F22F4.1	X	+	none available
F22F7.11	F22F7.11	V	+	none available
F22F7.12	F22F7.12	V	-	none available
F22F7.2.2	F22F7.2	V	+	none available
F22F7.4c	F22F7.4	V	-	none available
F22F7.6	F22F7.6	V	-	none available
F22G12.5c	F22G12.5	I	+	none available
F22G12.7	F22G12.7	I	+	none available
F23B12.1	F23B12.1	V	+	none available
F23D12.8	F23D12.8	X	+	none available
F23F1.2	F23F1.2	II	+	none available
F23H11.6	F23H11.6	III	-	none available
F25D1.3	F25D1.3	V	+	none available
F25D1.8	F25D1.8	V	+	none available
F25D7.5	F25D7.5	I	-	none available
F25E5.3	F25E5.3	V	+	none available
F25H2.6.1	F25H2.6	I	+	none available
F25H5.7	F25H5.7	I	+	none available
F26A1.14	F26A1.14	III	-	none available
F26A1.3	F26A1.3	III	+	none available
F26A1.4	F26A1.4	III	+	none available
F26A1.6	F26A1.6	III	-	none available
F26A1.7	F26A1.7	III	-	none available
F26B1.5	F26B1.5	I	+	none available
F26C11.3a	F26C11.3	II	-	none available
F26C11.4	F26C11.4	II	-	none available
F26D11.4	F26D11.4	V	-	none available
F26D2.10	F26D2.10	V	-	none available
F26D2.14	F26D2.14	V	+	none available
F26D2.16	F26D2.16	V	-	none available
F26F2.11a	F26F2.11	V	-	none available
F26F2.13	F26F2.13	V	+	none available
F26G1.10	F26G1.10	II	+	none available
F26G1.11	F26G1.11	II	+	none available
F26G1.9	F26G1.9	II	-	none available
F26H11.8	F26H11.8	II	+	none available
F27B3.8	F27B3.8	III	+	none available
F27C1.13	F27C1.13	I	-	none available
F27C1.3	F27C1.3	I	+	none available
F27C8.5	F27C8.5	IV	-	none available
F27D9.3	F27D9.3	X	+	none available
F27D9.4	F27D9.4	X	-	none available
F27D9.7	F27D9.7	X	-	none available
F27E5.3	F27E5.3	II	-	none available
F27E5.5	F27E5.5	II	-	none available
F27E5.8	F27E5.8	II	-	none available
F28A10.1	F28A10.1	II	+	F28A10.1 encodes a putative small-molecule methyltransferase, belonging to a large nematode-specific expanded family; F28A10.1 inhibits CEP-1- and HUS-1-dependent germline apoptosis, as do BMK-1, RAD-50, and RAD-51; F28A10.1 is expressed in neurons, and F28A10.1 transcripts are enriched in spermatogenesis; although F s obvious homologs are all Caenorhabditis proteins, it has distant similarity to…
F28A10.10	F28A10.10	II	-	none available
F28A10.2	F28A10.2	II	+	none available
F28A10.4	F28A10.4	II	+	none available
F28A10.5	F28A10.5	II	-	none available
F28A10.7	F28A10.7	II	-	none available
F28A10.8	F28A10.8	II	-	none available
F28A10.9	F28A10.9	II	-	none available
F28A12.10	F28A12.10	V	-	none available
F28B1.2	F28B1.2	V	+	none available
F28B1.3	F28B1.3	V	+	none available
F28B1.4	F28B1.4	V	+	none available
F28B1.5	F28B1.5	V	+	none available
F28B1.9	F28B1.9	V	+	none available
F28C10.1	F28C10.1	X	+	none available
F28C6.10	F28C6.10	II	+	none available
F28E10.4	F28E10.4	IV	-	none available
F28E10.5	F28E10.5	IV	+	none available
F28F9.2	F28F9.2	IV	+	none available
F28G4.2	F28G4.2	V	-	none available
F28G4.3	F28G4.3	V	-	none available
F28G4.4	F28G4.4	V	-	none available
F28H1.5	F28H1.5	I	-	none available
F28H6.7	F28H6.7	X	+	none available
F28H7.2	F28H7.2	V	+	none available
F28H7.4	F28H7.4	V	-	none available
F29A7.4	F29A7.4	II	+	none available
F29A7.5	F29A7.5	II	-	none available
F29A7.8	F29A7.8	II	-	none available
F29C12.6	F29C12.6	II	+	none available
F29C4.4.2	F29C4.4	IV	+	none available
F29D10.2	F29D10.2	I	+	none available
F29D10.3	F29D10.3	I	-	none available
F30A10.12	F30A10.12	I	+	none available
F30A10.4	F30A10.4	I	+	none available
F30B5.11	F30B5.11	IV	-	none available
F30H5.5	F30H5.5	III	+	none available
F31B12.4	F31B12.4	X	+	none available
F31B9.2	F31B9.2	X	+	none available
F31B9.4	F31B9.4	X	-	none available
F31D5.1	F31D5.1	II	+	none available
F31E3.6	F31E3.6	III	+	none available
F31F4.11a	F31F4.11	V	-	none available
F31F4.17	F31F4.17	V	-	none available
F31F6.1	F31F6.1	X	-	F31F6.1 encodes a novel protein that is conserved in C. elegans; three other genes related to F31F6.1 are present in tandem on the X chromosome.
F31F6.3	F31F6.3	X	-	F31F6.3 encodes a novel protein that is conserved in C. elegans; three other genes related to F31F6.3 are present in tandem on the X chromosome.
F31F7.3	F31F7.3	V	-	none available
F32B4.1	F32B4.1	I	+	none available
F32B6.10a	F32B6.10	IV	-	none available
F32B6.4.2	F32B6.4	IV	-	none available
F32D8.1	F32D8.1	V	+	none available
F32D8.3	F32D8.3	V	+	F32D8.3 encodes a putative secreted TIL-domain protease inhibitor paralogous to SWM-1, ISL-1, and the products of 11 other C. elegans genes; F32D8.3 and its relatives are collectively similar to other TIL-domain protease inhibitors from nematodes, insects, and vertebrates; F32D8.3 has no obvious function in mass RNAi assays.
F32D8.8	F32D8.8	V	-	none available
F32E10.8	F32E10.8	IV	+	none available
F32F2.4	F32F2.4	V	+	none available
F32G8.2	F32G8.2	V	+	none available
F32H2.11	F32H2.11	I	-	none available
F32H2.12	F32H2.12	I	-	none available
F32H2.7	F32H2.7	I	-	none available
F32H2.8	F32H2.8	I	+	none available
F33C8.2	F33C8.2	X	+	none available
F33D11.2.2	F33D11.2	I	+	none available
F33D11.6	F33D11.6	I	-	none available
F33D11.7	F33D11.7	I	-	none available
F33E2.6	F33E2.6	I	+	none available
F33H1.6	F33H1.6	II	+	none available
F33H12.1	F33H12.1	II	+	none available
F34D6.7	F34D6.7	II	+	none available
F34D6.8	F34D6.8	II	+	none available
F34D6.9	F34D6.9	II	-	none available
F34H10.1	F34H10.1	X	+	none available
F34H10.2	F34H10.2	X	+	none available
F34H10.5	F34H10.5	X	+	none available
F35A5.4	F35A5.4	X	-	none available
F35A5.5	F35A5.5	X	-	none available
F35B3.3	F35B3.3	X	+	none available
F35C5.1	F35C5.1	II	+	none available
F35C5.3	F35C5.3	II	+	none available
F35C5.4	F35C5.4	II	+	none available
F35C8.8	F35C8.8	X	-	none available
F35D2.1	F35D2.1	II	+	none available
F35D2.2	F35D2.2	II	+	none available
F35D2.6	F35D2.6	II	+	none available
F35E2.1	F35E2.1	I	-	none available
F35E2.2	F35E2.2	I	-	This gene encodes a protein containing an F-box, a motif predicted to mediate protein-protein interactions either with homologs of yeast Skp-1p or with other proteins.
F35E2.5	F35E2.5	I	-	none available
F35E8.1	F35E8.1	V	-	none available
F35E8.4	F35E8.4	V	-	none available
F35E8.6	F35E8.6	V	+	none available
F35E8.7	F35E8.7	V	+	none available
F35E8.9	F35E8.9	V	-	none available
F35F10.1	F35F10.1	V	+	none available
F35F10.10	F35F10.10	V	-	none available
F35F10.14	F35F10.14	V	-	none available
F35F10.4	F35F10.4	V	+	none available
F35F10.5	F35F10.5	V	+	none available
F35F10.7	F35F10.7	V	-	none available
F35F11.3	F35F11.3	IV	+	none available
F35G2.5a	F35G2.5	IV	+	none available
F35H12.7	F35H12.7	X	+	none available
F35H8.1	F35H8.1	II	-	none available
F35H8.12	F35H8.12	II	+	none available
F35H8.4	F35H8.4	II	-	none available
F36A2.11	F36A2.11	I	+	none available
F36A4.1	F36A4.1	IV	+	none available
F36A4.11	F36A4.11	IV	-	none available
F36A4.3	F36A4.3	IV	+	none available
F36D1.10	F36D1.10	I	+	none available
F36D1.12	F36D1.12	I	-	none available
F36D1.13	F36D1.13	I	-	none available
F36D1.14	F36D1.14	I	+	none available
F36D1.15	F36D1.15	I	+	none available
F36D1.23	F36D1.23	I	+	none available
F36D1.4	F36D1.4	I	+	none available
F36D1.8	F36D1.8	I	-	none available
F36D3.14	F36D3.14	V	-	none available
F36D3.16	F36D3.16	V	+	none available
F36D3.4	F36D3.4	V	-	none available
F36D3.5	F36D3.5	V	-	none available
F36D3.8	F36D3.8	V	+	none available
F36D4.1	F36D4.1	V	+	none available
F36D4.4	F36D4.4	V	-	none available
F36D4.6	F36D4.6	V	-	none available
F36D4.7	F36D4.7	V	-	none available
F36F12.1b	F36F12.1	V	-	none available
F36F12.2	F36F12.2	V	-	none available
F36F12.3d.	F36F12.3	V	+	none available
F36F12.7	F36F12.7	V	+	none available
F36G9.13	F36G9.13	V	+	none available
F36G9.15.2	F36G9.15	V	-	none available
F36H1.12	F36H1.12	IV	-	none available
F36H1.3	F36H1.3	IV	+	none available
F36H12.10	F36H12.10	IV	-	none available
F36H12.3	F36H12.3	IV	+	none available
F36H12.4	F36H12.4	IV	+	none available
F36H12.5	F36H12.5	IV	+	none available
F36H2.6	F36H2.6	I	+	none available
F36H5.12	F36H5.12	II	+	none available
F36H9.1	F36H9.1	V	+	none available
F36H9.10	F36H9.10	V	+	none available
F36H9.5	F36H9.5	V	-	none available
F37A4.3	F37A4.3	III	+	none available
F37A8.1	F37A8.1	III	+	none available
F37A8.2	F37A8.2	III	-	none available
F37B4.14	F37B4.14	V	-	none available
F37B4.15	F37B4.15	V	+	none available
F37C12.14	F37C12.14	III	-	none available
F37C12.3.2	F37C12.3	III	+	none available
F38A1.11	F38A1.11	IV	+	none available
F38A1.13	F38A1.13	IV	+	none available
F38A1.6	F38A1.6	IV	+	none available
F38A5.6	F38A5.6	IV	-	none available
F38B6.2	F38B6.2	X	+	none available
F38B6.3	F38B6.3	X	+	none available
F38B6.7	F38B6.7	X	-	none available
F38B6.8	F38B6.8	X	-	none available
F38C2.1d	F38C2.1	IV	+	none available
F38C2.4a	F38C2.4	IV	+	none available
F38E1.10	F38E1.10	V	-	none available
F38E1.11	F38E1.11	V	-	none available
F38E1.3	F38E1.3	V	+	none available
F38E11.6b	F38E11.6	IV	-	none available
F38E9.4	F38E9.4	X	+	none available
F38H12.5	F38H12.5	V	-	none available
F38H4.4	F38H4.4	IV	+	none available
F38H4.5	F38H4.5	IV	+	none available
F38H4.6	F38H4.6	IV	-	none available
F39B3.3	F39B3.3	X	-	none available
F39E9.14	F39E9.14	II	-	none available
F39F10.5	F39F10.5	X	-	none available
F39H12.2	F39H12.2	X	+	none available
F40A3.1	F40A3.1	V	+	none available
F40A3.2	F40A3.2	V	+	none available
F40D4.12	F40D4.12	V	+	none available
F40E12.2	F40E12.2	II	+	none available
F40F12.3	F40F12.3	III	-	none available
F40F8.12	F40F8.12	II	+	none available
F40G12.10	F40G12.10	V	+	none available
F40G12.2	F40G12.2	V	-	none available
F40G12.4	F40G12.4	V	-	none available
F40G12.6	F40G12.6	V	-	none available
F40G12.9	F40G12.9	V	+	none available
F40G9.17	F40G9.17	III	+	none available
F40G9.19	F40G9.19	III	+	none available
F40G9.7.1	F40G9.7	III	+	none available
F40G9.8	F40G9.8	III	-	none available
F40H6.2	F40H6.2	III	+	none available
F40H6.5	F40H6.5	III	-	none available
F40H6.6	F40H6.6	III	+	none available
F41B5.12	F41B5.12	V	+	none available
F41C3.7	F41C3.7	II	+	none available
F41C6.2	F41C6.2	X	+	none available
F41C6.3	F41C6.3	X	-	none available
F41C6.4b	F41C6.4	X	-	none available
F41D3.11	F41D3.11	I	-	none available
F41D3.7	F41D3.7	I	+	none available
F41D3.8	F41D3.8	I	-	none available
F41D3.9	F41D3.9	I	-	none available
F41E6.11	F41E6.11	V	-	none available
F41E6.8	F41E6.8	V	-	none available
F41E7.6	F41E7.6	X	-	none available
F41F3.1	F41F3.1	V	+	none available
F41F3.8	F41F3.8	V	+	none available
F41G3.19	F41G3.19	II	-	none available
F41G3.2	F41G3.2	II	+	none available
F41G3.20	F41G3.20	II	-	none available
F41G3.3	F41G3.3	II	+	none available
F41G4.4	F41G4.4	X	-	none available
F41G4.5	F41G4.5	X	-	none available
F41H10.12	F41H10.12	IV	+	none available
F41H10.2	F41H10.2	IV	+	none available
F41H8.1	F41H8.1	V	+	none available
F41H8.2	F41H8.2	V	+	none available
F42A6.2	F42A6.2	IV	+	none available
F42A9.11	F42A9.11	IV	+	none available
F42A9.17	F42A9.17	IV	-	none available
F42A9.9	F42A9.9	IV	-	none available
F42C5.5a	F42C5.5	IV	-	none available
F42E11.3	F42E11.3	X	-	none available
F42E8.1	F42E8.1	V	+	none available
F42F12.11	F42F12.11	X	+	none available
F42F12.14	F42F12.14	X	+	none available
F42G2.7b.1	F42G2.7	II	+	none available
F42G8.8	F42G8.8	IV	+	none available
F43B10.1	F43B10.1	X	-	none available
F43C11.10	F43C11.10	II	-	none available
F43C11.11	F43C11.11	II	-	none available
F43C11.12	F43C11.12	II	-	none available
F43C11.1a	F43C11.1	II	+	none available
F43C11.2	F43C11.2	II	+	none available
F43C11.4	F43C11.4	II	+	none available
F43C9.1	F43C9.1	X	+	This gene encodes a protein containing an F-box, a motif predicted to mediate protein-protein interactions either with homologs of yeast Skp-1p or with other proteins.
F43D9.1	F43D9.1	III	+	none available
F43E12.1	F43E12.1	X	+	none available
F43E2.9	F43E2.9	II	+	none available
F43G6.16	F43G6.16	II	-	none available
F43G9.4	F43G9.4	I	-	none available
F44A2.7	F44A2.7	V	+	none available
F44D12.10	F44D12.10	IV	-	none available
F44D12.16	F44D12.16	IV	+	none available
F44D12.19	F44D12.19	IV	+	none available
F44D12.6	F44D12.6	IV	+	none available
F44D12.8b	F44D12.8	IV	+	none available
F44E5.2	F44E5.2	II	+	none available
F44E5.3	F44E5.3	II	-	none available
F44E7.12	F44E7.12	V	-	none available
F44F1.3	F44F1.3	I	+	none available
F44F4.10	F44F4.10	II	-	F44F4.1 encodes a nematode-specific sperm protein probably required for a normally high ovulation rate; F44F4.1 has no obvious non-nematode homologs, but does have a putative central coiled-coil domain, and is is paralogous to four other C. elegans proteins (B0207.11, F42G4.6, T08G11.2, and Y81G3A.1); F44F4.1(tm332) hermaphrodites show abnormal egg-laying, retaining significantly fewer eggs than …
F44F4.9	F44F4.9	II	-	none available
F44G3.10	F44G3.10	V	-	F44G3.10 encodes a claudin homolog that may be required for normal cohesion of apical junctions in epithelia; F44G3.10 is worm-specific, with obvious homologs only in C. elegans; F44G3.10 has no obvious function in mass RNAi assays; claudins are integral membrane proteins with four transmembrane sequences that are found in mammalian tight junctions (TJs), induce TJs when transgenically expressed …
F44G4.5	F44G4.5	II	-	none available
F45B8.3	F45B8.3	X	-	none available
F45C12.9	F45C12.9	II	+	none available
F45D11.1.1	F45D11.1	II	+	none available
F45E1.2	F45E1.2	X	+	none available
F45E1.5	F45E1.5	X	+	F45E1.5 encodes a protein containing a region of similarity to carboxypeptidase A and a C-terminal coiled-coil region; phylogenetic analyses suggest that the product of F45E1.5 is a unique C. elegans EFhd (EF-hand) isoform that diverged from an efhd/aif1 precursor gene present in Bilateria.
F46A8.3	F46A8.3	I	-	none available
F46A8.4	F46A8.4	I	-	none available
F46A8.5	F46A8.5	I	-	none available
F46A8.6	F46A8.6	I	-	none available
F46A8.7	F46A8.7	I	-	none available
F46A8.8	F46A8.8	I	-	none available
F46A9.2	F46A9.2	I	+	none available
F46B3.1	F46B3.1	V	-	none available
F46B3.14c	F46B3.14	V	-	none available
F46B3.15	F46B3.15	V	-	none available
F46B3.16	F46B3.16	V	+	none available
F46B3.23	F46B3.23	V	-	none available
F46B3.8	F46B3.8	V	-	none available
F46B3.9	F46B3.9	V	-	none available
F46B6.10	F46B6.10	V	-	none available
F46B6.13	F46B6.13	V	-	none available
F46B6.9	F46B6.9	V	+	none available
F46C3.7	F46C3.7	X	+	none available
F46C5.4	F46C5.4	II	+	none available
F46C5.7	F46C5.7	II	+	none available
F46C8.1	F46C8.1	X	+	none available
F46E10.18	F46E10.18	V	+	none available
F46E10.3	F46E10.3	V	+	none available
F46F11.11	F46F11.11	I	-	none available
F46F3.3a	F46F3.3	V	+	none available
F46F5.1	F46F5.1	II	-	none available
F46F5.10	F46F5.10	II	+	none available
F46F5.11	F46F5.11	II	+	none available
F46F5.13	F46F5.13	II	+	none available
F46F5.14	F46F5.14	II	+	none available
F46F5.16	F46F5.16	II	+	none available
F46F5.5	F46F5.5	II	-	none available
F46F5.6	F46F5.6	II	-	none available
F46F5.7	F46F5.7	II	-	none available
F46F5.8	F46F5.8	II	-	none available
F46F5.9	F46F5.9	II	-	none available
F46G11.6	F46G11.6	X	+	none available
F46H5.5	F46H5.5	X	-	none available
F47B10.3	F47B10.3	X	+	none available
F47B10.4	F47B10.4	X	+	none available
F47B10.6	F47B10.6	X	+	none available
F47B10.8b	F47B10.8	X	-	none available
F47B3.1	F47B3.1	I	+	none available
F47B3.2	F47B3.2	I	+	none available
F47B3.3	F47B3.3	I	+	none available
F47B3.5	F47B3.5	I	-	none available
F47B3.6	F47B3.6	I	-	none available
F47B3.7	F47B3.7	I	-	none available
F47B7.3	F47B7.3	X	-	none available
F47B7.4	F47B7.4	X	-	none available
F47B7.5	F47B7.5	X	-	none available
F47B8.10	F47B8.10	V	+	F47B8.10 is orthologous to the human gene GLUCOSE-6-PHOSPHATE TRANSPORTER 1 (G6PT1; OMIM:602671), which when mutated leads to type Ib glycogen storage disease.
F47B8.13	F47B8.13	V	-	none available
F47B8.14	F47B8.14	V	+	none available
F47B8.18	F47B8.18	V	-	none available
F47C12.13	F47C12.13	IV	-	none available
F47C12.6	F47C12.6	IV	-	none available
F47C12.7	F47C12.7	IV	-	none available
F47D2.11	F47D2.11	V	-	none available
F47E1.1	F47E1.1	X	+	none available
F47E1.2	F47E1.2	X	+	none available
F47E1.3	F47E1.3	X	+	none available
F47E1.5	F47E1.5	X	+	none available
F47F2.2	F47F2.2	X	-	none available
F47F6.4	F47F6.4	II	+	none available
F47F6.9	F47F6.9	II	+	none available
F47G3.4	F47G3.4	X	+	none available
F47G4.5	F47G4.5	I	-	F47G4.5 encodes a paralog of MEI-2 that, like MEI-2, binds MEI-1 in vitro; F47G4.5 might thus be an alternative ligand of MEI-1 in vivo.
F47G9.6	F47G9.6	V	+	none available
F48B9.1	F48B9.1	X	+	none available
F48B9.3	F48B9.3	X	+	none available
F48C1.3	F48C1.3	I	+	none available
F48F7.3	F48F7.3	X	+	none available
F48G7.12b	F48G7.12	V	-	none available
F48G7.7	F48G7.7	V	-	none available
F48G7.8	F48G7.8	V	-	none available
F49B2.3	F49B2.3	I	+	none available
F49B2.6	F49B2.6	I	+	none available
F49C12.1	F49C12.1	IV	-	none available
F49C12.10	F49C12.10	IV	-	none available
F49C12.2	F49C12.2	IV	-	none available
F49C12.5	F49C12.5	IV	+	none available
F49C5.10	F49C5.10	II	+	none available
F49C5.4	F49C5.4	II	+	none available
F49C5.5	F49C5.5	II	-	none available
F49C5.7	F49C5.7	II	+	none available
F49C5.9	F49C5.9	II	-	none available
F49D11.11	F49D11.11	I	-	none available
F49D11.14	F49D11.14	I	-	none available
F49D11.2	F49D11.2	I	+	none available
F49D11.3a	F49D11.3	I	+	none available
F49D11.4	F49D11.4	I	+	none available
F49D11.6	F49D11.6	I	-	none available
F49D11.7	F49D11.7	I	-	none available
F49E11.7	F49E11.7	IV	+	none available
F49E11.8	F49E11.8	IV	-	none available
F49E12.12	F49E12.12	II	+	none available
F49E12.7	F49E12.7	II	-	none available
F49F1.10	F49F1.10	IV	-	none available
F49F1.11	F49F1.11	IV	-	none available
F49F1.12	F49F1.12	IV	-	none available
F49F1.14	F49F1.14	IV	-	none available
F49F1.15	F49F1.15	IV	-	none available
F49F1.18	F49F1.18	IV	-	none available
F49F1.2	F49F1.2	IV	+	none available
F49F1.4	F49F1.4	IV	-	none available
F49F1.5a	F49F1.5	IV	-	none available
F49F1.9	F49F1.9	IV	-	none available
F49H6.12	F49H6.12	V	-	none available
F49H6.15	F49H6.15	V	-	none available
F49H6.17	F49H6.17	V	+	none available
F49H6.8	F49H6.8	V	-	none available
F52C6.13	F52C6.13	II	-	none available
F52C6.14	F52C6.14	II	-	none available
F52D10.4	F52D10.4	X	+	none available
F52D2.6	F52D2.6	X	+	none available
F52E10.2	F52E10.2	X	-	none available
F52F10.2	F52F10.2	V	+	none available
F52G3.3	F52G3.3	X	-	none available
F52G3.4	F52G3.4	X	-	none available
F53A2.11	F53A2.11	III	-	none available
F53B1.9	F53B1.9	X	-	none available
F53B2.5	F53B2.5	IV	-	none available
F53C3.3	F53C3.3	II	+	none available
F53E10.3	F53E10.3	V	+	none available
F53E4.2	F53E4.2	V	+	none available
F53F4.1	F53F4.1	V	+	none available
F53F4.15	F53F4.15	V	+	none available
F53F4.18	F53F4.18	V	+	none available
F53F4.2	F53F4.2	V	-	none available
F53F4.4c	F53F4.4	V	+	none available
F53F4.7	F53F4.7	V	-	none available
F53G2.3	F53G2.3	II	+	none available
F53G2.8	F53G2.8	II	-	none available
F54B11.11	F54B11.11	X	+	none available
F54B11.8	F54B11.8	X	-	none available
F54B11.9	F54B11.9	X	+	none available
F54B3.4	F54B3.4	II	-	none available
F54C1.1	F54C1.1	I	+	none available
F54C1.6	F54C1.6	I	-	none available
F54C1.8	F54C1.8	I	-	none available
F54D1.1	F54D1.1	IV	+	none available
F54D10.8	F54D10.8	II	-	none available
F54D10.9	F54D10.9	II	-	none available
F54D12.1	F54D12.1	II	+	none available
F54D12.11	F54D12.11	II	-	none available
F54D12.2	F54D12.2	II	+	none available
F54D12.4	F54D12.4	II	-	none available
F54D12.7	F54D12.7	II	-	none available
F54D12.8	F54D12.8	II	-	none available
F54D12.9	F54D12.9	II	-	none available
F54D5.23	F54D5.23	II	-	none available
F54E7.6	F54E7.6	III	-	none available
F54F12.1	F54F12.1	III	-	none available
F54F2.6	F54F2.6	III	-	none available
F54F7.10	F54F7.10	X	+	none available
F54F7.8	F54F7.8	X	-	none available
F54H12.8	F54H12.8	III	-	none available
F54H5.2a	F54H5.2	II	+	none available
F54H5.3	F54H5.3	II	+	none available
F54H5.5	F54H5.5	II	-	none available
F55A3.6	F55A3.6	I	-	none available
F55A4.7	F55A4.7	X	-	none available
F55B11.3	F55B11.3	IV	+	none available
F55B11.7a	F55B11.7	IV	-	none available
F55B12.2	F55B12.2	V	-	none available
F55C10.4	F55C10.4	V	+	none available
F55C12.2	F55C12.2	II	+	none available
F55C12.6	F55C12.6	II	-	none available
F55C7.2	F55C7.2	I	+	none available
F55C9.11	F55C9.11	V	-	This gene encodes a protein containing an F-box, a motif predicted to mediate protein-protein interactions either with homologs of yeast Skp-1p or with other proteins.
F55C9.3.1	F55C9.3	V	-	none available
F55D1.2	F55D1.2	X	+	none available
F55E10.1	F55E10.1	X	+	none available
F55E10.2	F55E10.2	X	+	none available
F55E10.4	F55E10.4	X	-	none available
F55E10.5	F55E10.5	X	-	none available
F55F1.2	F55F1.2	X	-	none available
F55F10.3	F55F10.3	IV	+	none available
F55F8.8	F55F8.8	I	-	none available
F55G11.1	F55G11.1	IV	-	none available
F55G11.10	F55G11.10	IV	+	none available
F55G11.6	F55G11.6	IV	+	none available
F55G11.7.2	F55G11.7	IV	+	none available
F55G7.3	F55G7.3	X	-	none available
F55G7.4	F55G7.4	X	+	none available
F55G7.5	F55G7.5	X	-	none available
F56A11.6	F56A11.6	IV	-	none available
F56A11.7	F56A11.7	IV	+	none available
F56A4.10	F56A4.10	V	-	none available
F56A4.11	F56A4.11	V	-	none available
F56A4.5	F56A4.5	V	+	none available
F56A4.6	F56A4.6	V	-	none available
F56A6.8	F56A6.8	I	+	none available
F56A8.8	F56A8.8	III	+	none available
F56B3.6	F56B3.6	IV	+	none available
F56B3.9	F56B3.9	IV	+	none available
F56B6.6	F56B6.6	X	-	none available
F56C3.1	F56C3.1	X	+	none available
F56C3.10	F56C3.10	X	-	none available
F56C3.4	F56C3.4	X	-	none available
F56C3.5	F56C3.5	X	-	none available
F56C3.7	F56C3.7	X	-	none available
F56D5.2	F56D5.2	IV	-	none available
F56D5.9	F56D5.9	IV	-	none available
F56D6.11	F56D6.11	IV	-	none available
F56D6.12	F56D6.12	IV	+	none available
F56D6.13	F56D6.13	IV	+	none available
F56D6.18	F56D6.18	IV	-	none available
F56D6.19	F56D6.19	IV	+	none available
F56D6.20	F56D6.20	IV	+	none available
F56D6.21	F56D6.21	IV	+	none available
F56D6.22	F56D6.22	IV	-	none available
F56D6.23	F56D6.23	IV	+	none available
F56D6.6	F56D6.6	IV	+	none available
F56F4.4	F56F4.4	I	+	none available
F56G4.7	F56G4.7	I	-	none available
F56H1.10	F56H1.10	I	+	none available
F56H1.3	F56H1.3	I	-	none available
F56H11.6	F56H11.6	IV	-	none available
F56H6.1	F56H6.1	I	+	none available
F56H6.13	F56H6.13	I	+	none available
F56H6.2	F56H6.2	I	+	none available
F56H6.3	F56H6.3	I	-	none available
F56H6.4	F56H6.4	I	+	none available
F56H6.6	F56H6.6	I	-	none available
F56H6.7	F56H6.7	I	+	none available
F56H6.9	F56H6.9	I	+	none available
F56H9.6	F56H9.6	V	-	none available
F56H9.8a	F56H9.8	V	+	none available
F57A8.6	F57A8.6	V	-	none available
F57A8.7	F57A8.7	V	+	none available
F57B1.1	F57B1.1	V	-	none available
F57B1.8b	F57B1.8	V	-	none available
F57E7.2	F57E7.2	V	-	none available
F57E7.4	F57E7.4	V	-	none available
F57F4.1	F57F4.1	V	+	none available
F57F4.2	F57F4.2	V	-	none available
F57G12.2b	F57G12.2	X	-	none available
F57G4.10	F57G4.10	V	+	none available
F57G8.7	F57G8.7	V	+	none available
F57G9.7	F57G9.7	II	-	none available
F58A4.1	F58A4.1	III	+	none available
F58A6.5	F58A6.5	II	-	none available
F58B4.2	F58B4.2	V	-	none available
F58B4.7	F58B4.7	V	-	none available
F58D12.3	F58D12.3	V	+	none available
F58D12.5	F58D12.5	V	-	none available
F58D2.2	F58D2.2	IV	+	none available
F58D5.6	F58D5.6	I	+	none available
F58D5.8	F58D5.8	I	-	none available
F58E2.2	F58E2.2	IV	+	none available
F58E2.5	F58E2.5	IV	+	none available
F58E6.4	F58E6.4	V	-	none available
F58E6.5	F58E6.5	V	-	none available
F58E6.6	F58E6.6	V	-	none available
F58E6.8	F58E6.8	V	-	none available
F58F12.3	F58F12.3	II	-	none available
F58F6.3	F58F6.3	IV	-	none available
F58F6.5	F58F6.5	IV	+	none available
F58F9.1a	F58F9.1	IV	+	none available
F58F9.6b	F58F9.6	IV	-	none available
F58F9.9b	F58F9.9	IV	+	none available
F58G1.8	F58G1.8	II	-	none available
F58G4.3	F58G4.3	V	+	none available
F58G6.8	F58G6.8	IV	+	none available
F58H1.8	F58H1.8	V	+	none available
F59A1.11a	F59A1.11	V	-	none available
F59A1.12	F59A1.12	V	-	none available
F59A1.15	F59A1.15	V	-	none available
F59A1.16	F59A1.16	V	-	none available
F59A1.18	F59A1.18	V	-	none available
F59A1.6	F59A1.6	V	+	none available
F59A2.2b	F59A2.2	III	+	none available
F59A3.10	F59A3.10	I	-	none available
F59A3.13	F59A3.13	I	+	none available
F59A6.11	F59A6.11	II	-	none available
F59A6.2	F59A6.2	II	+	none available
F59A6.3	F59A6.3	II	+	none available
F59A6.4	F59A6.4	II	+	none available
F59A7.12	F59A7.12	V	+	none available
F59A7.14	F59A7.14	V	+	none available
F59B1.4	F59B1.4	V	-	none available
F59B1.6	F59B1.6	V	-	none available
F59B10.2	F59B10.2	II	-	none available
F59B10.6	F59B10.6	II	-	none available
F59B2.12	F59B2.12	III	+	none available
F59B2.15	F59B2.15	III	-	none available
F59C6.3	F59C6.3	I	+	none available
F59D12.3	F59D12.3	X	-	none available
F59E11.6	F59E11.6	V	+	none available
[truncated: 3,555 more rows]
